# Supplementary material for: Rh(iii)-Catalyzed three-component cascade annulation to produce the N-oxopropyl chain of isoquinolone derivatives
Source: Royal Society of Chemistry journal article supplement (doi:10.1039/d0ob02389b), 2020-12-18

## Supporting Information

# Rh(III)-Catalyzed Three-Component Cascade Annulation to Produce *N*-oxopropyl Chain of Isoquinolone Derivatives

Yuan He, Xian-Zhang Liao, and Lin Dong\*

*Key Laboratory of Drug-Targeting and Drug Delivery System of the Education Ministry, Sichuan Research Center for Drug Precision Industrial Technology, West China School of Pharmacy, Sichuan University, Chengdu 610041, China*

*dongl@scu.edu.cn*

### Table of Contents

|                                                                                  |           |
|----------------------------------------------------------------------------------|-----------|
| <b>1. General Information.....</b>                                               | <b>2</b>  |
| <b>2. Material.....</b>                                                          | <b>2</b>  |
| <b>3. General Procedure for the Synthesis of Isoquinolone Derivatives...3</b>    | <b>3</b>  |
| <b>4. Optimization of the Reaction Conditions .....</b>                          | <b>3</b>  |
| <b>5. Synthetic Applications .....</b>                                           | <b>5</b>  |
| <b>6. Mechanism Study.....</b>                                                   | <b>7</b>  |
| <b>7. References.....</b>                                                        | <b>10</b> |
| <b>8. Characterization Data and NMR Spectra of Isoquinolone Derivatives.....</b> | <b>10</b> |
| <b>9. <sup>1</sup>H, <sup>13</sup>C and <sup>19</sup>F NMR spectra .....</b>     | <b>27</b> |

## 1. General Information

All reactions were carried out in high-pressure reaction tube. Column chromatography was performed with silica gel (200–300 mesh). High-resolution mass spectra (HRMS) were obtained with a Waters-Q-TOF-Premier (ESI).  $^1\text{H}$  NMR and  $^{13}\text{C}$  NMR spectra were recorded on a Bruker 400 MHz and 100MHz instrument. Spectra were reported relative to  $\text{Me}_4\text{Si}$  ( $\delta$  0.0 ppm),  $\text{CDCl}_3$  ( $\delta$  7.26 ppm).  $^{13}\text{C}$  NMR were reported relative to  $\text{CDCl}_3$  ( $\delta$  77.16 ppm). Splitting patterns are designated as follows: s, singlet; d, doublet; t, triplet; q, quartet; m, multiplet. Compounds were characterized by  $^1\text{H}$  NMR,  $^{13}\text{C}$  NMR,  $^{19}\text{F}$  NMR and HRMS.

## 2. Material

Unless otherwise noted, all reagents were obtained from commercial suppliers and used without further purification. Solvents were dried over sodium (for THF and ether) by refluxing for overnight and freshly distilled prior to use. Unless otherwise noted, all methanol was obtained from commercial suppliers and used without further purification. Methanol was dried and distilled from magnesium powder under nitrogen atmosphere. 2,5-diphenyloxazole,<sup>[1]</sup> 5-(*tert*-butyl)-2-phenyloxazole,<sup>[1]</sup> 2-phenyl-5-(*p*-tolyl)oxazole,<sup>[2]</sup> 5-(4-methoxyphenyl)-2-phenyloxazole<sup>[2]</sup>, 2-phenyl-5-(*m*-tolyl)oxazole,<sup>[2]</sup> 5-(3-methoxyphenyl)-2-phenyloxazole<sup>[2]</sup> were all prepared following literature procedures.

### Preparation of 2-aryloxazoline

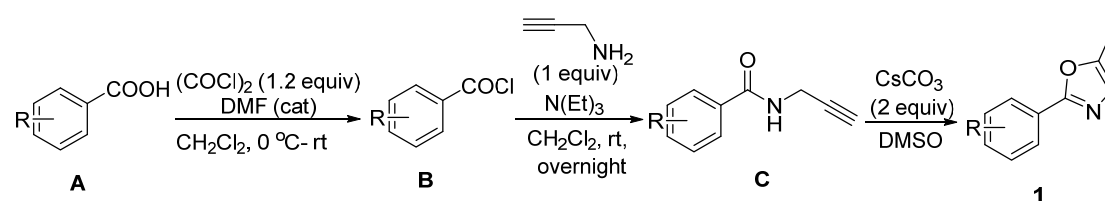

A 100 mL oven-dried round bottom flask with a stir bar was purged with argon and charged with benzoic acid **A** (5 mmol) in anhydrous  $\text{CH}_2\text{Cl}_2$  (15 mL), which was added DMF (3 drop) at 0 °C and  $(\text{COCl})_2$  (1.2 equiv) was subsequently added dropwise by syringe. After 15 min, the reaction mixture was allowed to warm to room temperature overnight. After removal of the volatiles under vacuum, the crude product **B** was used directly without any further purification.<sup>[3]</sup>

To a solution of the propargylic amine (5.0 mmol) in anhydrous  $\text{CH}_2\text{Cl}_2$  (15 mL) at 0 °C,  $\text{Et}_3\text{N}$  (1.5 equiv) and DMAP (2 mol%) were added, and the acid chloride (1.0 equiv) was added dropwise at 0 °C. After 15 min, the mixture was stirred overnight at room temperature overnight. After the reaction was completed, the mixture was quenched with water and extracted with  $\text{CH}_2\text{Cl}_2$  ( $3 \times 20$  mL), the combined organic layer was washed with brine and then the combined organic layers were dried ( $\text{MgSO}_4$ ), filtered, and concentrated in vacuo. Purification of the residue by column chromatography (petroleum ether/ethyl acetate = 3/1, v/v) afforded the product **C**.<sup>[4]</sup>

A mixture of propargylamides **C**,  $\text{Cs}_2\text{CO}_3$  (2 equiv), DMSO (10 mL), was heated at 100 °C for 2 h and cooled to room temperature. The mixture was quenched with water and extracted with  $\text{EtOAc}$  ( $3 \times 20$  mL), the combined organic layer was washed with brine and then the combined organic layers were dried ( $\text{MgSO}_4$ ), filtered, and concentrated in vacuo. Purification of the residue by column chromatography (petroleum ether/ethyl acetate = 10/1, v/v) afforded the product **1**.<sup>[5]</sup>

## Preparation of diphenylacetylene derivatives

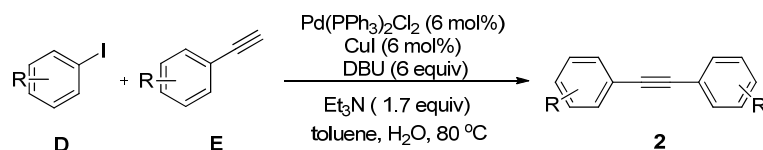

To a solution of the Pd(PPh<sub>3</sub>)<sub>2</sub>Cl<sub>2</sub> (6 mol%), CuI (6 mol%), DBU (6 equiv), Et<sub>3</sub>N (1.7 equiv) in toluene (30 mL) and H<sub>2</sub>O (0.4 equiv), iodide derivatives **D** (6 mmol, 1 equiv) and alkyne derivatives **E** (1.1 equiv) were added and stirred at 80 °C for 18 h. The mixture was quenched with water and extracted with EtOAc (3 × 20 mL), the combined organic layer was washed with brine and then the combined organic layers were dried (MgSO<sub>4</sub>), filtered, and concentrated in vacuo. Purification of the residue by column chromatography (petroleum ether) afforded the product **2**.<sup>[6]</sup>

## 3. General Procedure for the Synthesis of Isoquinolone Derivatives

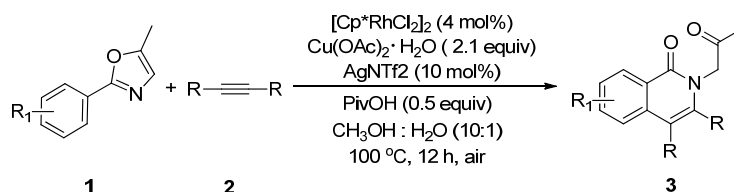

A mixture of 2-phenyloxazole **1** (0.05 mmol), acetylene derivatives **2** (1.5 equiv), [Cp\*RhCl<sub>2</sub>]<sub>2</sub> (4 mol%), Cu(OAc)<sub>2</sub>·H<sub>2</sub>O (2.1 equiv), AgNTf<sub>2</sub> (10 mol%) and PivOH (0.5 equiv) were added to an oven dried high pressure tube under air atmosphere. MeOH (0.5 mL) and H<sub>2</sub>O (50 μL) were then added by syringe. The reaction mixture was stirred at 100 °C for 12 h. After removal of the volatiles under vacuum, the crude product was purified by column chromatography on silica gel afforded the pure product **3**.

## 4. Optimization of the Reaction Conditions

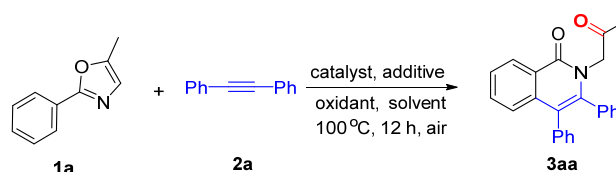

**Table S1. The effect of catalysts on the reaction<sup>a</sup>**

| Entry | Catalyst                                                          | Oxidant                                | Solvent            | Yield <sup>b</sup> /% |
|-------|-------------------------------------------------------------------|----------------------------------------|--------------------|-----------------------|
| 1     | [RhCl(C <sub>2</sub> H <sub>4</sub> ) <sub>2</sub> ] <sub>2</sub> | Cu(OAc) <sub>2</sub> ·H <sub>2</sub> O | CH <sub>3</sub> OH | ND                    |
| 2     | [Rh(OAc) <sub>2</sub> ] <sub>2</sub>                              | Cu(OAc) <sub>2</sub> ·H <sub>2</sub> O | CH <sub>3</sub> OH | ND                    |
| 3     | [Rh(COD)Cl] <sub>2</sub>                                          | Cu(OAc) <sub>2</sub> ·H <sub>2</sub> O | CH <sub>3</sub> OH | ND                    |
| 4     | [Rh(COD) <sub>2</sub> BF <sub>4</sub> ]                           | Cu(OAc) <sub>2</sub> ·H <sub>2</sub> O | CH <sub>3</sub> OH | ND                    |
| 5     | Cp*Rh(OAc) <sub>2</sub> ·H <sub>2</sub> O                         | Cu(OAc) <sub>2</sub> ·H <sub>2</sub> O | CH <sub>3</sub> OH | 18                    |

|   |                                                                         |                                        |                    |    |
|---|-------------------------------------------------------------------------|----------------------------------------|--------------------|----|
| 6 | Cp*Rh(CH <sub>3</sub> CN) <sub>3</sub> (SbF <sub>6</sub> ) <sub>2</sub> | Cu(OAc) <sub>2</sub> ·H <sub>2</sub> O | CH <sub>3</sub> OH | 44 |
| 7 | [Cp*RhCl <sub>2</sub> ] <sub>2</sub>                                    | Cu(OAc) <sub>2</sub> ·H <sub>2</sub> O | CH <sub>3</sub> OH | 57 |

<sup>a</sup>Reaction conditions: **1a** (0.05 mmol), **2a** (2.0 equiv), Catalyst (5 mol%), Cu(OAc)<sub>2</sub>·H<sub>2</sub>O (2.1 equiv), AgNTf<sub>2</sub> (20 mol%), CH<sub>3</sub>OH (0.5 mL), 100 °C, 12 h under air. <sup>b</sup>Isolated yields.

**Table S2. The effect of oxidants and additives on the reaction<sup>a</sup>**

| Entry           | Oxidant                                | Additive                                                              | Yield <sup>b</sup> /% |
|-----------------|----------------------------------------|-----------------------------------------------------------------------|-----------------------|
| 1               | Cu(acac) <sub>2</sub>                  | AgNTf <sub>2</sub>                                                    | ND                    |
| 2               | Cu(OTf) <sub>2</sub>                   | AgNTf <sub>2</sub>                                                    | ND                    |
| 3               | AgCO <sub>3</sub>                      | AgNTf <sub>2</sub>                                                    | ND                    |
| 4               | AgOAc                                  | AgNTf <sub>2</sub>                                                    | ND                    |
| 5               | Cu(OAc) <sub>2</sub>                   | AgNTf <sub>2</sub>                                                    | Trace                 |
| 6               | Cu(OAc) <sub>2</sub> ·H <sub>2</sub> O | AgNTf <sub>2</sub>                                                    | 57                    |
| 7               | Cu(OAc) <sub>2</sub> ·H <sub>2</sub> O | AgSbF <sub>6</sub>                                                    | 52                    |
| 8               | Cu(OAc) <sub>2</sub> ·H <sub>2</sub> O | AgOTf                                                                 | 14                    |
| 9               | Cu(OAc) <sub>2</sub> ·H <sub>2</sub> O | AgSO <sub>3</sub> CH <sub>3</sub>                                     | 40                    |
| 10              | Cu(OAc) <sub>2</sub> ·H <sub>2</sub> O | AgBF <sub>4</sub>                                                     | 51                    |
| 11              | Cu(OAc) <sub>2</sub> ·H <sub>2</sub> O | AgNTf <sub>2</sub> /H <sub>2</sub> O                                  | 65                    |
| 12              | Cu(OAc) <sub>2</sub> ·H <sub>2</sub> O | AgNTf <sub>2</sub> /PhSO <sub>3</sub> H/H <sub>2</sub> O              | ND                    |
| 13              | Cu(OAc) <sub>2</sub> ·H <sub>2</sub> O | AgNTf <sub>2</sub> /AcOH/H <sub>2</sub> O                             | 42                    |
| 14              | Cu(OAc) <sub>2</sub> ·H <sub>2</sub> O | AgNTf <sub>2</sub> /PhCOOH/H <sub>2</sub> O                           | 65                    |
| 15              | Cu(OAc) <sub>2</sub> ·H <sub>2</sub> O | AgNTf <sub>2</sub> /TFA/H <sub>2</sub> O                              | 40                    |
| 16              | Cu(OAc) <sub>2</sub> ·H <sub>2</sub> O | AgNTf <sub>2</sub> /PhOCH <sub>2</sub> COOH/H <sub>2</sub> O          | 64                    |
| 17              | Cu(OAc) <sub>2</sub> ·H <sub>2</sub> O | AgNTf <sub>2</sub> /1-AdCOOH/H <sub>2</sub> O                         | 66                    |
| 18              | Cu(OAc) <sub>2</sub> ·H <sub>2</sub> O | AgNTf <sub>2</sub> /PivOH/H <sub>2</sub> O                            | 74                    |
| 19 <sup>c</sup> | Cu(OAc) <sub>2</sub> ·H <sub>2</sub> O | AgNTf <sub>2</sub> /PivOH/H <sub>2</sub> O                            | 53                    |
| 20 <sup>d</sup> | Cu(OAc) <sub>2</sub> ·H <sub>2</sub> O | AgNTf <sub>2</sub> /PivOH/H <sub>2</sub> O                            | 52                    |
| 21              | Cu(OAc) <sub>2</sub> ·H <sub>2</sub> O | AgNTf <sub>2</sub> /K <sub>3</sub> PO <sub>4</sub> /H <sub>2</sub> O  | 67                    |
| 22              | Cu(OAc) <sub>2</sub> ·H <sub>2</sub> O | AgNTf <sub>2</sub> /Na <sub>2</sub> CO <sub>3</sub> /H <sub>2</sub> O | 40                    |
| 23              | Cu(OAc) <sub>2</sub> ·H <sub>2</sub> O | AgNTf <sub>2</sub> /NaHCO <sub>3</sub> /H <sub>2</sub> O              | 54                    |

<sup>a</sup>Reaction conditions: **1a** (0.05 mmol), **2a** (2.0 equiv), [Cp\*RhCl<sub>2</sub>]<sub>2</sub> (5 mol%), Oxidant (2.1 equiv), silver salt (20 mol%)/Additive (1 equiv)/ H<sub>2</sub>O (50 μL), CH<sub>3</sub>OH (0.5 mL), 100 °C, 12 h under air. <sup>b</sup>Isolated yields. <sup>c</sup>80 °C. <sup>d</sup>120 °C.

**Table S3. The effect of solvents on the reaction<sup>a</sup>**

| Entry | Solvent            | Yield <sup>b</sup> /% |
|-------|--------------------|-----------------------|
| 1     | THF                | 56                    |
| 2     | DCE                | 41                    |
| 3     | CH <sub>3</sub> CN | 57                    |
| 4     | Toluene            | Trace                 |
| 5     | 1,4-Dioxane        | 42                    |
| 6     | EtOH               | 64                    |

|                 |                    |    |
|-----------------|--------------------|----|
| 7               | H <sub>2</sub> O   | ND |
| 8 <sup>c</sup>  | CH <sub>3</sub> OH | 60 |
| 9               | CH <sub>3</sub> OH | 74 |
| 10 <sup>d</sup> | CH <sub>3</sub> OH | 46 |

<sup>a</sup>Reaction conditions: **1a** (0.05 mmol), **2a** (2.0 equiv), [Cp\*RhCl<sub>2</sub>]<sub>2</sub> (5 mol%), Cu(OAc)<sub>2</sub>·H<sub>2</sub>O (2.1 equiv), AgNTf<sub>2</sub> (20 mol%), PivOH (1 equiv), Solvent (0.5 mL), H<sub>2</sub>O (50 μL), 100 °C, 12 h under air. <sup>b</sup>Isolated yields. <sup>c</sup>30 μL H<sub>2</sub>O. <sup>d</sup>70 μL H<sub>2</sub>O.

**Table S4. The effect of equivalent on the reaction<sup>a</sup>**

| Entry | <b>2a</b> /equiv | Catalyst/mol%                           | Oxidant/equiv                              | AgNTf <sub>2</sub> /mol% | PivOH/equiv | Yield <sup>b</sup> /% |
|-------|------------------|-----------------------------------------|--------------------------------------------|--------------------------|-------------|-----------------------|
| 1     | 2                | [Cp*RhCl <sub>2</sub> ] <sub>2</sub> /2 | Cu(OAc) <sub>2</sub> ·H <sub>2</sub> O/2.1 | AgNTf <sub>2</sub> /20   | PivOH/1     | 70                    |
| 2     | 2                | [Cp*RhCl <sub>2</sub> ] <sub>2</sub> /3 | Cu(OAc) <sub>2</sub> ·H <sub>2</sub> O/2.1 | AgNTf <sub>2</sub> /20   | PivOH/1     | 72                    |
| 3     | 2                | [Cp*RhCl <sub>2</sub> ] <sub>2</sub> /4 | Cu(OAc) <sub>2</sub> ·H <sub>2</sub> O/2.1 | AgNTf <sub>2</sub> /20   | PivOH/1     | 80                    |
| 4     | 2                | [Cp*RhCl <sub>2</sub> ] <sub>2</sub> /5 | Cu(OAc) <sub>2</sub> ·H <sub>2</sub> O/2.1 | AgNTf <sub>2</sub> /20   | PivOH/1     | 74                    |
| 5     | 1.2              | [Cp*RhCl <sub>2</sub> ] <sub>2</sub> /4 | Cu(OAc) <sub>2</sub> ·H <sub>2</sub> O/2.1 | AgNTf <sub>2</sub> /20   | PivOH/1     | 75                    |
| 6     | 1.5              | [Cp*RhCl <sub>2</sub> ] <sub>2</sub> /4 | Cu(OAc) <sub>2</sub> ·H <sub>2</sub> O/2.1 | AgNTf <sub>2</sub> /20   | PivOH/1     | 82                    |
| 7     | 1.8              | [Cp*RhCl <sub>2</sub> ] <sub>2</sub> /4 | Cu(OAc) <sub>2</sub> ·H <sub>2</sub> O/2.1 | AgNTf <sub>2</sub> /20   | PivOH/1     | 80                    |
| 8     | 1.5              | [Cp*RhCl <sub>2</sub> ] <sub>2</sub> /4 | Cu(OAc) <sub>2</sub> ·H <sub>2</sub> O/1.5 | AgNTf <sub>2</sub> /20   | PivOH/1     | 62                    |
| 9     | 1.5              | [Cp*RhCl <sub>2</sub> ] <sub>2</sub> /4 | Cu(OAc) <sub>2</sub> ·H <sub>2</sub> O/2.5 | AgNTf <sub>2</sub> /20   | PivOH/1     | 66                    |
| 10    | 1.5              | [Cp*RhCl <sub>2</sub> ] <sub>2</sub> /4 | Cu(OAc) <sub>2</sub> ·H <sub>2</sub> O/2.1 | AgNTf <sub>2</sub> /20   | PivOH/1.5   | 75                    |
| 11    | 1.5              | [Cp*RhCl <sub>2</sub> ] <sub>2</sub> /4 | Cu(OAc) <sub>2</sub> ·H <sub>2</sub> O/2.1 | AgNTf <sub>2</sub> /20   | PivOH/0.5   | 82                    |
| 12    | 1.5              | [Cp*RhCl <sub>2</sub> ] <sub>2</sub> /4 | Cu(OAc) <sub>2</sub> ·H <sub>2</sub> O/2.1 | AgNTf <sub>2</sub> /30   | PivOH/0.5   | 73                    |
| 13    | 1.5              | [Cp*RhCl <sub>2</sub> ] <sub>2</sub> /4 | Cu(OAc) <sub>2</sub> ·H <sub>2</sub> O/2.1 | AgNTf <sub>2</sub> /10   | PivOH/0.5   | 86                    |

<sup>a</sup>Reaction conditions: **1a** (0.05 mmol), **2a** (x equiv), [Cp\*RhCl<sub>2</sub>]<sub>2</sub> (x mol%), Cu(OAc)<sub>2</sub>·H<sub>2</sub>O (x equiv), AgNTf<sub>2</sub> (x mol%), PivOH (x equiv), CH<sub>3</sub>OH (0.5 mL), 50 μL H<sub>2</sub>O, 100 °C, 12 h under air. <sup>b</sup>Isolated yields.

**Table S5. The effect of methanol on the reaction<sup>a</sup>**

| Entry | Catalyst/mol%                           | Oxidant/equiv                              | AgNTf <sub>2</sub> /mol% | Solvent           | Yield <sup>b</sup> /% |
|-------|-----------------------------------------|--------------------------------------------|--------------------------|-------------------|-----------------------|
| 1     | [Cp*RhCl <sub>2</sub> ] <sub>2</sub> /4 | Cu(OAc) <sub>2</sub> ·H <sub>2</sub> O/2.1 | AgNTf <sub>2</sub> /10   | MeOH              | 40                    |
| 2     | [Cp*RhCl <sub>2</sub> ] <sub>2</sub> /4 | Cu(OAc) <sub>2</sub> /2.1                  | AgNTf <sub>2</sub> /10   | MeOH              | 9                     |
| 3     | [Cp*RhCl <sub>2</sub> ] <sub>2</sub> /4 | Cu(OAc) <sub>2</sub> /2.1                  | AgNTf <sub>2</sub> /10   | MeOH <sup>c</sup> | 33%                   |

<sup>a</sup>Reaction conditions: **1a** (0.05 mmol), **2a** (1.5 equiv), [Cp\*RhCl<sub>2</sub>]<sub>2</sub> (4 mol%), Oxidant (2.1 equiv), AgNTf<sub>2</sub> (10mol%), treated anhydrous CH<sub>3</sub>OH (0.5 mL), 100 °C, 12 h under air. <sup>b</sup>Isolated yields. <sup>c</sup>untreated MeOH.

## 5. Synthetic Applications

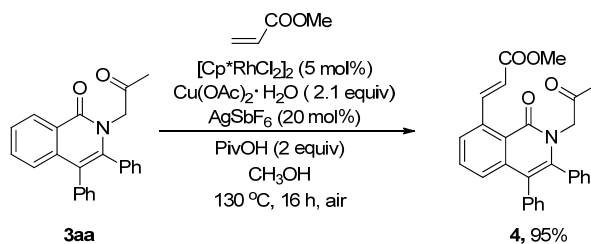

### Synthesis of 4

A mixture of **3aa** (0.05 mmol), methyl acrylate (3 equiv), [Cp\*RhCl<sub>2</sub>]<sub>2</sub> (5 mol%), Cu(OAc)<sub>2</sub>·H<sub>2</sub>O (2.1 equiv), AgSbF<sub>6</sub> (20 mol%) and PivOH (2 equiv) were added to an oven dried high pressure tube under air atmosphere. MeOH (0.5 mL) was then added by syringe. The reaction mixture was stirred at 130 °C for 16 h. After removal of the solvent, the crude product was separated by column chromatography (petroleum ether/ethyl acetate = 4/1, v/v) to afford the product **4** as a white solid (95% yield). Melting point: 178.3 – 181.7 °C; <sup>1</sup>H NMR (400 MHz, CDCl<sub>3</sub>): δ = 9.04 (d, *J* = 15.8 Hz, 1H), 7.53 – 7.42 (m, 2H), 7.21–7.13 (m, 7H), 7.11–7.04 (m, 4H), 6.17 (d, *J* = 15.9 Hz, 1H), 4.61 (s, 2H), 3.81 (s, 3H), 2.04 (s, 3H); <sup>13</sup>C NMR (100 MHz, CDCl<sub>3</sub>): δ = 201.8, 167.3, 162.1, 147.8, 141.4, 139.1, 138.5, 136.5, 134.4, 132.0, 131.6, 129.9, 128.7, 128.3, 128.2, 127.4, 127.3, 127.1, 122.5, 119.7, 118.9, 55.7, 51.8, 27.4. HRMS (ESI): *m/z* calcd for C<sub>28</sub>H<sub>23</sub>O<sub>4</sub>NNa [M+Na]<sup>+</sup> : 460.1525, found: 460.1527.

### Synthesis of 6

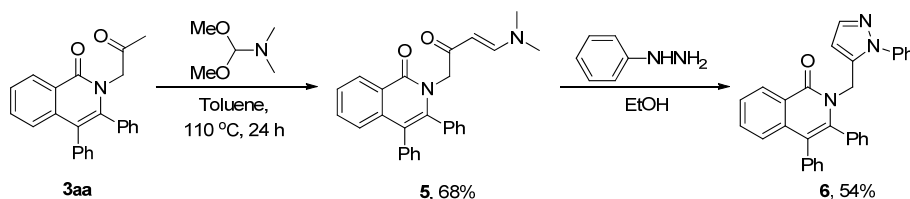

To a stirred solution of **3aa** (0.05 mmol, 1.0 equiv) in toluene (0.5 mL), 1,1-dimethoxy-N,N-dimethylmethanamine (3 equiv) was added, and the mixture was stirred at 110 °C. After completion of the reaction (monitored by TLC), The reaction mixture was allowed to cool to room temperature. The resulting solid was filtered off, washed with toluene, the crude product **5** was used directly without any further purification.<sup>[7]</sup>

A mixture of **5** (0.04 mmol) and phenylhydrazine (0.05 mL) in ethanol (0.5 mL) was refluxed at 110 °C overnight. After removal of the solvent, the crude product was separated by column chromatography on silica gel (petroleum ether/ethyl acetate = 8/1, v/v) to afford the pure product **6** as a white solid (54% yield).<sup>[8]</sup> Melting point: 162.1 – 163.3 °C; <sup>1</sup>H NMR (400 MHz, CDCl<sub>3</sub>): δ = 8.61 (d, *J* = 5.6 Hz, 1H), 7.79 (d, *J* = 2.4 Hz, 1H), 7.64 – 7.46 (m, 4H), 7.40 (t, *J* = 7.8 Hz, 2H), 7.26 – 7.11 (m, 10H), 7.11 – 7.05 (m, 2H), 6.37 (d, *J* = 2.4 Hz, 1H), 5.24 (s, 2H); <sup>13</sup>C NMR (100 MHz, CDCl<sub>3</sub>): δ = 162.6, 150.9, 141.6, 140.2, 137.6, 136.7, 134.5, 132.4, 131.7, 130.8, 129.4, 128.4, 128.2, 128.0, 127.8, 127.3, 126.9, 126.7, 126.2, 125.6, 125.3, 119.4, 118.9, 107.3, 44.3. HRMS (ESI): *m/z* calcd for C<sub>31</sub>H<sub>23</sub>ON<sub>3</sub>Na [M+Na]<sup>+</sup> : 476.1739, found: 476.1736.

### Synthesis of 8

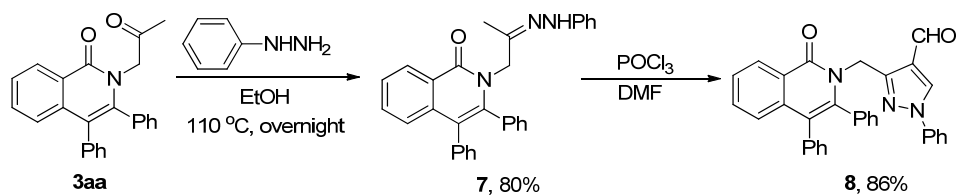

A mixture of **3aa** (0.1 mmol), AcOH (3drop) and phenylhydrazine (0.05 mL) in ethanol (0.5 mL) was refluxed at 110 °C overnight. The reaction mixture was refluxed overnight, and allowed to cool at room temperature. The solid product formed was collected by filtration and recrystallized from ethanol to afford the product **7**.

POCl<sub>3</sub> (0.1 mol) was added dropwise to DMF (2 mL) at 0 °C. After 1 h, a solution of **7** (0.05 mol) in DMF (1 mL) was added dropwise at 0 °C. The mixture was stirred at 0 °C for 1 h and at 80 °C for 1 h, then cooled to room temperature and 100 g ice was added. The solid product formed was collected by filtration to give the crude product, the crude product was separated by column chromatography on silica gel (petroleum ether/ethyl acetate =2/1, v/v) afforded the pure products **8** as a white solid (86% yield).<sup>[9]</sup> Melting point: 201.1 – 203.7 °C; <sup>1</sup>H NMR (400 MHz, CDCl<sub>3</sub>): δ = 9.85 (s, 1H), 8.56 (dd, *J* = 7.9, 1.5 Hz, 1H), 8.29 (s, 1H), 7.63 – 7.47 (m, 4H), 7.43 (t, *J* = 7.8 Hz, 2H), 7.32 (t, *J* = 7.4 Hz, 1H), 7.23 – 7.06 (m, 11H), 5.47 (s, 2H); <sup>13</sup>C NMR (100 MHz, CDCl<sub>3</sub>): δ = 184.0, 162.5, 151.5, 141.5, 139.1, 137.7, 136.7, 134.8, 132.4, 131.9, 131.7, 130.5, 129.7, 128.4, 128.3, 128.0, 127.9, 127.7, 126.9, 126.7, 125.6, 125.2, 122.5, 119.6, 119.3, 43.5. HRMS (ESI): *m/z* calcd for C<sub>32</sub>H<sub>23</sub>O<sub>2</sub>N<sub>3</sub>Na [M+Na]<sup>+</sup> : 504.1688, found: 504.1690.

## 6. Mechanism Study

Deuterium-labeling experiments were carried out to study the mechanism of this reaction. **1a** (0.2 mmol), [Cp\**Rh*Cl<sub>2</sub>]<sub>2</sub> (4 mol%), Cu(OAc)<sub>2</sub> (2.1 equiv), AgNTf<sub>2</sub> (10 mol%) were stirred in CH<sub>3</sub>OD (1 mL) under air atmosphere at 100 °C for 12 h. After completion, the crude product was separated by column chromatography (petroleum ether/ethyl acetate =10/1, v/v) to afford the product **1a**+**[D<sub>2</sub>]-1a**. The deuterium rate (90%) was obtained from <sup>1</sup>H NMR. Deuterium was observed at both *ortho*-positions, which indicated the possibility of the reaction pathway via *ortho* C–H activation.

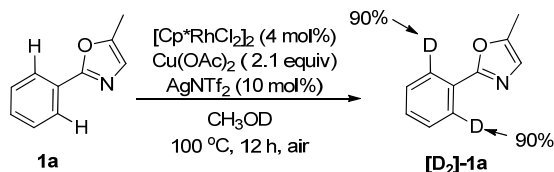

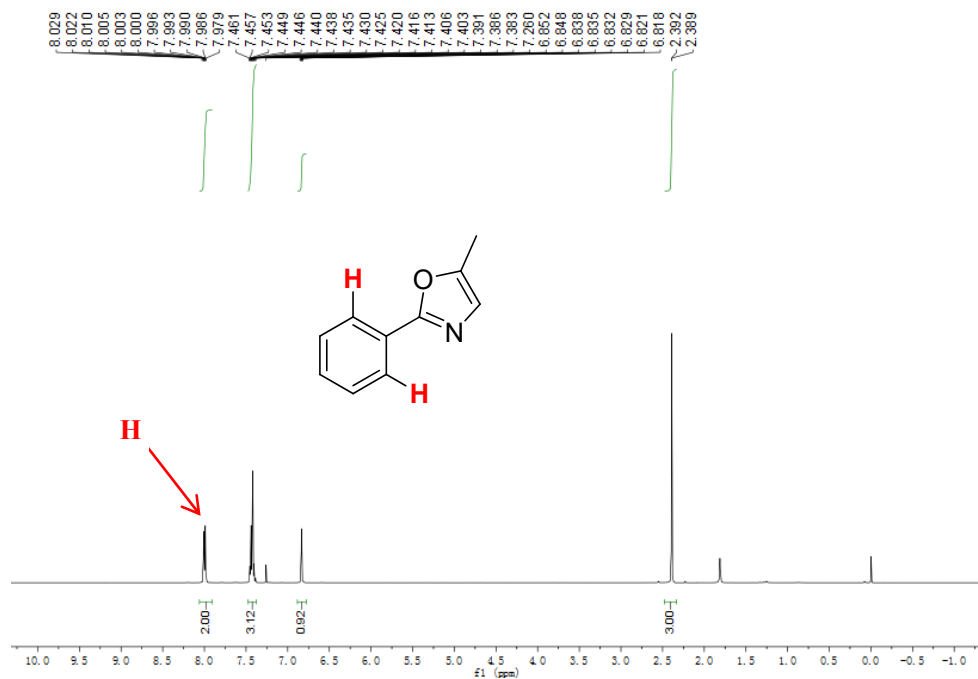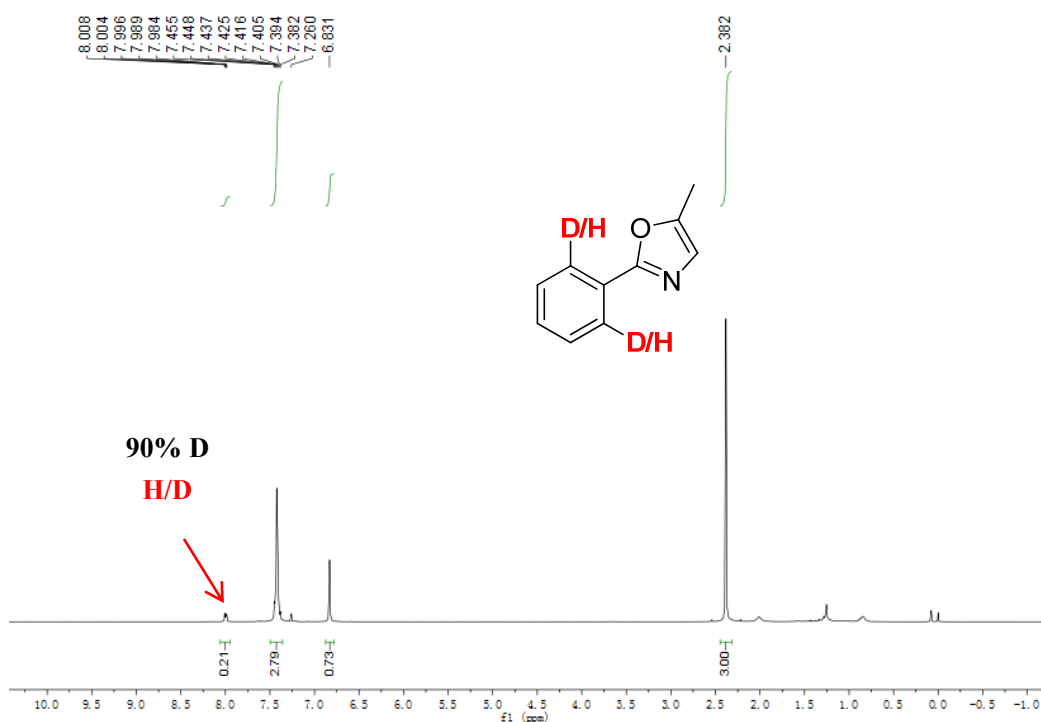

In addition, the kinetic isotope effect (KIE) study was conducted. **1a** (0.05 mmol), [**D**<sub>2</sub>]-**1a** (0.05 mmol, 90% D), and diphenylacetylene **2a** (3 equiv) were stirred at 100 °C for 4 h under standard conditions. After completion, the reaction mixture was purified by flash chromatography eluting with ethyl acetate and petroleum ether (1:3) to give **3aa** + [**D**]-**3aa**. The ratio of two products was determined by <sup>1</sup>H NMR integration method to give kinetic isotopic effect (KIE)  $k_H/k_D = 1.3$ , thus indicating that the first C-H bond cleavage might be not involved in the product determining step.



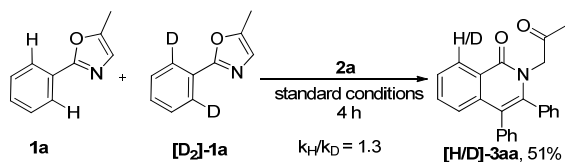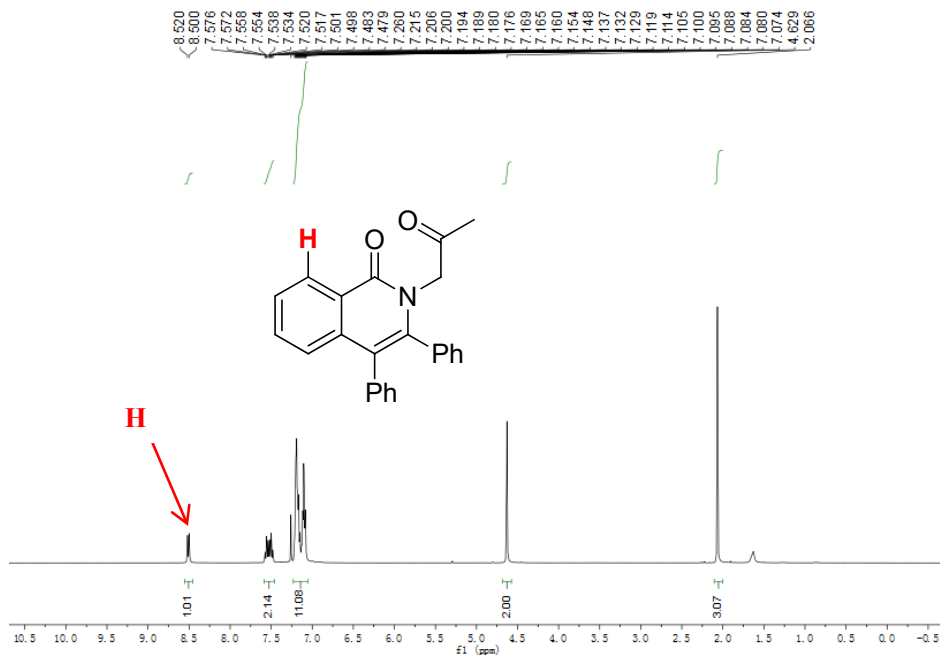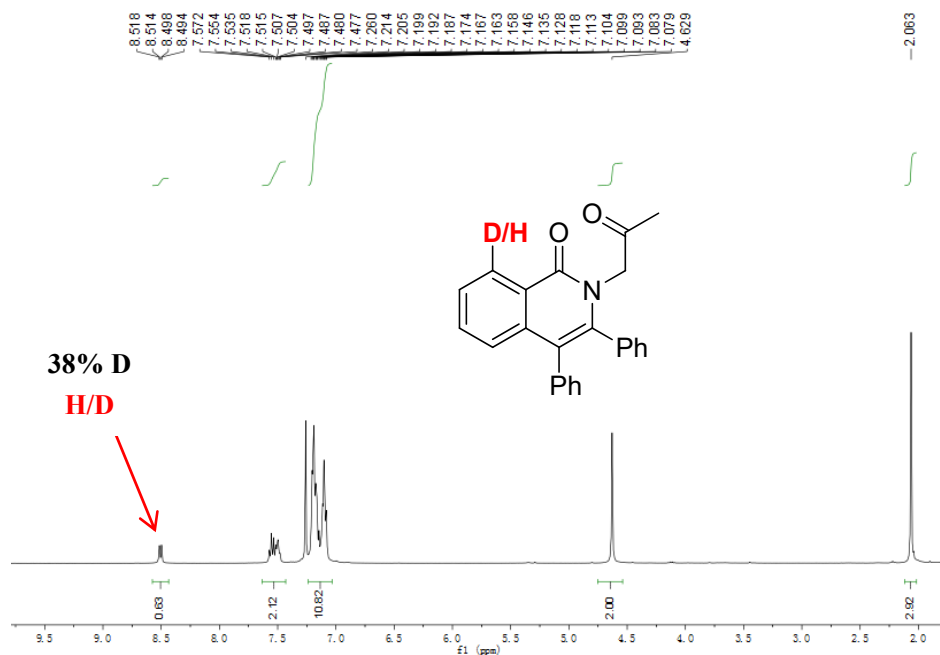

<sup>18</sup>O labeling experiments were carried out to study the mechanism of this reaction. **1a** (0.05 mmol), [Cp\*RhCl<sub>2</sub>]<sub>2</sub> (4 mol%), Cu(OAc)<sub>2</sub> (2.1 equiv), AgNTf<sub>2</sub> (10 mol%) were stirred in treated anhydrous CH<sub>3</sub>OH (0.5 mL) under Ar atmosphere at 100 °C for 16 h. After completion, the crude product was separated by column chromatography (petroleum ether/ethyl acetate =10/1, v/v) to afford the product **3aa'**.

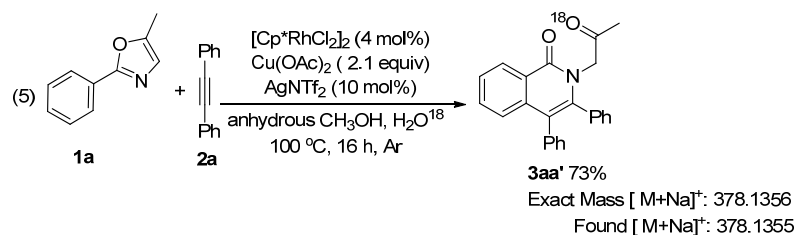

## 7. References

- (1) Gao, W. C.; Wang, R. L. *Org. Biomol. Chem.*, **2013**, *11*, 7123–7128.
- (2) Zhang, F.; Wang, J. *ChemistrySelect*. **2017**, *2*, 8717–8720.
- (3) Kou, X.; Kou, K. G. M. *ACS Catal.* **2020**, *10*, 3103–3109.
- (4) Ma, J. W.; Wang, Q. *J. Org. Chem.* **2018**, *83*, 13296–13307.
- (5) Zhang, L.; Xiao, K. *Eur. J. Org. Chem.* **2018**, 6913–6918.
- (6) Li, T.; Liu, C. *Org. Biomol. Chem.* **2019**, *17*, 7679–7683.
- (7) Jiang, Y.; Khong, V. Z. *Chem. Commun.* **2012**, *48*, 3133–3135.
- (8) Hasui, T.; Ohyabu, N. *Bioorg. Med. Chem.* **2014**, *22*, 5428–5445.
- (9) Ivonin, S. P.; Kurpil', B. B. *Monatsh Chem.* **2014**, *145*, 2011–2017

## 8. Characterization Data and NMR Spectra of isoquinolone derivatives

### 2-(2-oxopropyl)-3,4-diphenylisoquinolin-1(2H)-one (**3aa**)

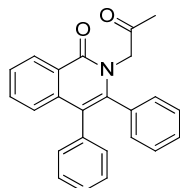

The general procedure was applied to **1a** (0.05 mmol), **2a** (1.5 equiv), [Cp\*RhCl<sub>2</sub>]<sub>2</sub> (4 mol%), Cu(OAc)<sub>2</sub>•H<sub>2</sub>O (2.1 equiv), AgNTf<sub>2</sub> (10 mol%), PivOH (0.5 equiv) and H<sub>2</sub>O (50 μL) in MeOH (0.5 mL) at 100 °C for 12 h under air. Purification by column chromatography on silica gel (petroleum ether/ethyl acetate = 3/1, v/v) afforded **3aa** as a white solid (86% yield). Melting point: 183.6 – 184.4 °C; <sup>1</sup>H NMR (400 MHz, CDCl<sub>3</sub>): δ = 8.51 (d, *J* = 7.9 Hz, 1H), 7.53 (m, 2H), 7.23 – 7.05 (m, 11H), 4.63 (s, 2H), 2.07 (s, 3H); <sup>13</sup>C NMR (100 MHz, CDCl<sub>3</sub>): δ = 201.9, 162.3, 140.6, 137.6, 136.4, 134.7, 132.6, 131.6, 130.1, 128.7, 128.3, 128.1, 128.0, 127.0, 126.9, 125.7, 124.8, 119.2, 55.7, 27.4. HRMS (ESI): *m/z* calcd for C<sub>24</sub>H<sub>19</sub>O<sub>2</sub>NNa [M+Na]<sup>+</sup>: 376.1313, found: 376.1315.

### 6-methyl-2-(2-oxopropyl)-3,4-diphenylisoquinolin-1(2H)-one (**3ba**)

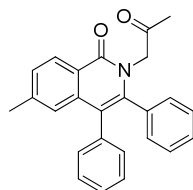

The general procedure was applied to **1b** (0.05 mmol), **2a** (1.2 equiv), [Cp\*RhCl<sub>2</sub>]<sub>2</sub> (4 mol%), Cu(OAc)<sub>2</sub>•H<sub>2</sub>O (2.1 equiv), AgNTf<sub>2</sub> (10 mol%), PivOH (0.5 equiv) and H<sub>2</sub>O (50 μL) in MeOH

(0.5 mL) at 100 °C for 12 h under air. Purification by column chromatography on silica gel (petroleum ether/ethyl acetate = 3/1, v/v) afforded **3ba** as a white solid (75% yield). Melting point: 185.5 – 187.6 °C; <sup>1</sup>H NMR (400 MHz, CDCl<sub>3</sub>): δ = 8.39 (d, *J* = 8.2 Hz, 1H), 7.32 (dd, *J* = 8.2, 1.6 Hz, 1H), 7.24 – 7.14 (m, 6H), 7.13 – 7.05 (m, 4H), 6.94 (s, 1H), 4.61 (s, 2H), 2.35 (s, 3H), 2.06 (s, 3H); <sup>13</sup>C NMR (100 MHz, CDCl<sub>3</sub>): δ = 202.1, 162.3, 143.2, 140.7, 137.7, 136.6, 134.8, 131.6, 130.2, 128.6, 128.5, 128.3, 128.1, 128.0, 126.9, 125.3, 122.7, 119.1, 55.6, 27.4, 22.2. HRMS (ESI): *m/z* calcd for C<sub>25</sub>H<sub>21</sub>O<sub>2</sub>NNa [M+Na]<sup>+</sup> : 390.1470, found: 390.1474.

6-methoxy-2-(2-oxopropyl)-3,4-diphenylisoquinolin-1(2*H*)-one (**3ca**)

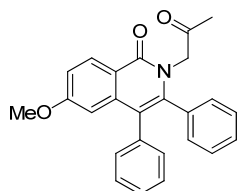

The general procedure was applied to **1c** (0.05 mmol), **2a** (1.5 equiv), [Cp\**Rh*Cl<sub>2</sub>]<sub>2</sub> (4 mol%), Cu(OAc)<sub>2</sub>•H<sub>2</sub>O ( 2.1 equiv), AgNTf<sub>2</sub> (10 mol%), PivOH (0.5 equiv) and H<sub>2</sub>O (50 μL) in MeOH (0.5 mL) at 100 °C for 10 h under air. Purification by column chromatography on silica gel (petroleum ether/ethyl acetate = 3/1, v/v) afforded **3ca** as a white solid (93% yield). Melting point: 180.1 – 181.7 °C; <sup>1</sup>H NMR (400 MHz, CDCl<sub>3</sub>): δ = 8.42 (d, *J* = 8.9 Hz, 1H), 7.23 – 7.12 (m, 6H), 7.12 – 7.04 (m, 5H), 6.52 (d, *J* = 2.5 Hz, 1H), 4.59 (s, 2H), 3.69 (s, 3H), 2.05 (s, 3H); <sup>13</sup>C NMR (100 MHz, CDCl<sub>3</sub>): δ = 202.1, 163.0, 161.9, 141.3, 139.8, 136.4, 134.8, 131.5, 130.2, 130.0, 128.6, 128.3, 128.1, 127.0, 118.9, 118.8, 115.7, 107.4, 55.5, 55.4 (d, *J* = 8.1 Hz), 27.4. HRMS (ESI): *m/z* calcd for C<sub>25</sub>H<sub>21</sub>O<sub>3</sub>NNa [M+Na]<sup>+</sup> : 406.1419, found: 406.1420.

6-ethoxy-2-(2-oxopropyl)-3,4-diphenylisoquinolin-1(2*H*)-one (**3da**)

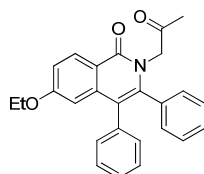

The general procedure was applied to **1d** (0.05 mmol), **2a** (1.2 equiv), [Cp\**Rh*Cl<sub>2</sub>]<sub>2</sub> (4 mol%), Cu(OAc)<sub>2</sub>•H<sub>2</sub>O ( 2.1 equiv), AgNTf<sub>2</sub> (10 mol%), PivOH (0.5 equiv) and H<sub>2</sub>O (50 μL) in MeOH (0.5 mL) at 100 °C for 10 h under air. Purification by column chromatography on silica gel (petroleum ether/ethyl acetate = 3/1, v/v) afforded **3da** as a white solid (82% yield). Melting point: 195.9 – 198.6 °C; <sup>1</sup>H NMR (400 MHz, CDCl<sub>3</sub>): δ = 8.41 (d, *J* = 8.9 Hz, 1H), 7.22 – 7.11 (m, 6H), 7.10 – 7.00(m, 5H), 6.51 (s, 1H), 4.59 (s, 2H), 3.90 (q, *J* = 7.0 Hz, 2H), 2.04 (s, 3H), 1.32 (t, *J* = 7.0 Hz, 3H); <sup>13</sup>C NMR (100 MHz, CDCl<sub>3</sub>): δ = 202.0, 162.4, 161.9, 141.2, 139.7, 136.5, 134.8, 131.5, 130.1, 130.0, 128.5, 128.2, 128.0, 126.9, 118.9, 118.6, 115.9, 108.1, 63.6, 55.4, 27.3, 14.6. HRMS (ESI): *m/z* calcd for C<sub>26</sub>H<sub>23</sub>O<sub>3</sub>NNa [M+Na]<sup>+</sup> : 420.1576, found: 420.1578.

6-isopropyl-2-(2-oxopropyl)-3,4-diphenylisoquinolin-1(2*H*)-one (**3ea**)

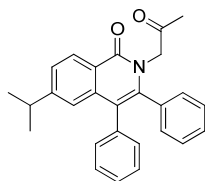

The general procedure was applied to **1e** (0.05 mmol), **2a** (1.2 equiv), [Cp\**RhCl*<sub>2</sub>]<sub>2</sub> (4 mol%), Cu(OAc)<sub>2</sub>•H<sub>2</sub>O (2.1 equiv), AgNTf<sub>2</sub> (10 mol%), PivOH (0.5 equiv) and H<sub>2</sub>O (50 μL) in MeOH (0.5 mL) at 100 °C for 10 h under air. Purification by column chromatography on silica gel (petroleum ether/ethyl acetate = 3/1, v/v) afforded **3ea** as a white solid (83% yield). Melting point: 158.8 – 160.1 °C; <sup>1</sup>H NMR (400 MHz, CDCl<sub>3</sub>): δ = 8.44 (d, *J* = 8.3 Hz, 1H), 7.40 (dd, *J* = 8.3, 1.8 Hz, 1H), 7.22 – 7.14 (m, 6H), 7.13 – 7.06 (m, 4H), 6.99 (s, 1H), 4.61 (s, 2H), 2.88 (m, 1H), 2.05 (s, 3H), 1.17 (d, *J* = 6.9 Hz, 6H); <sup>13</sup>C NMR (100 MHz, CDCl<sub>3</sub>): δ = 202.0, 162.2, 153.9, 140.6, 137.8, 136.5, 134.8, 131.6, 130.2, 128.6, 128.3, 128.2, 128.0, 126.9, 125.6, 123.1, 123.0, 119.3, 55.6, 34.6, 27.4, 23.8. HRMS (ESI): *m/z* calcd for C<sub>27</sub>H<sub>25</sub>O<sub>2</sub>NNa [M+Na]<sup>+</sup> : 418.1783, found: 418.1780.

6-(*tert*-butyl)-2-(2-oxopropyl)-3,4-diphenylisoquinolin-1(2*H*)-one (**3fa**)

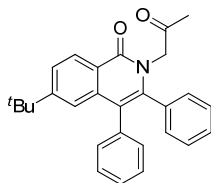

The general procedure was applied to **1f** (0.05 mmol), **2a** (1.2 equiv), [Cp\**RhCl*<sub>2</sub>]<sub>2</sub> (4 mol%), Cu(OAc)<sub>2</sub>•H<sub>2</sub>O (2.1 equiv), AgNTf<sub>2</sub> (10 mol%), PivOH (0.5 equiv) and H<sub>2</sub>O (50 μL) in MeOH (0.5 mL) at 100 °C for 10 h under air. Purification by column chromatography on silica gel (petroleum ether/ethyl acetate = 3/1, v/v) afforded **3fa** as a white solid (73% yield). Melting point: 167.2 – 169.4 °C; <sup>1</sup>H NMR (400 MHz, CDCl<sub>3</sub>): δ = 8.43 (d, *J* = 8.5 Hz, 1H), 7.57 (dd, *J* = 8.5, 1.9 Hz, 1H), 7.24 – 7.13 (m, 7H), 7.13 – 7.07 (m, 4H), 4.61 (s, 2H), 2.06 (s, 3H), 1.22 (s, 9H); <sup>13</sup>C NMR (100 MHz, CDCl<sub>3</sub>): δ = 202.0, 162.2, 156.1, 140.5, 137.5, 136.5, 134.9, 131.6, 130.2, 128.6, 128.3, 128.0, 127.8, 126.9, 125.0, 122.6, 121.7, 119.5, 55.6, 35.4, 31.1, 27.4. HRMS (ESI): *m/z* calcd for C<sub>28</sub>H<sub>27</sub>O<sub>2</sub>NNa [M+Na]<sup>+</sup> : 432.1939, found: 432.1934.

2-(2-oxopropyl)-3,4-diphenyl-6-(trifluoromethyl)isoquinolin-1(2*H*)-one (**3ga**)

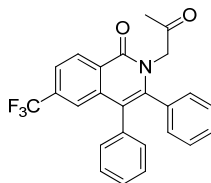

The general procedure was applied to **1g** (0.05 mmol), **2a** (1.5 equiv), [Cp\**RhCl*<sub>2</sub>]<sub>2</sub> (4 mol%), Cu(OAc)<sub>2</sub>•H<sub>2</sub>O (2.1 equiv), AgNTf<sub>2</sub> (10 mol%), PivOH (0.5 equiv) and H<sub>2</sub>O (50 μL) in MeOH (0.5 mL) at 100 °C for 12 h under air. Purification by column chromatography on silica gel (petroleum ether/ethyl acetate = 3/1, v/v) afforded **3ga** as a white solid (74% yield). Melting point: 163.9 – 165.4 °C; <sup>1</sup>H NMR (400 MHz, CDCl<sub>3</sub>): δ = 8.61 (d, *J* = 8.4 Hz, 1H), 7.69 (dd, *J* = 8.4, 1.7 Hz, 1H), 7.45 (s, 1H), 7.25 – 7.16 (m, 6H), 7.13 – 7.03 (m, 4H), 4.65 (s, 2H), 2.06 (s, 3H); <sup>13</sup>C NMR (100 MHz, CDCl<sub>3</sub>): δ = 201.4, 161.5, 142.3, 137.7, 135.3, 134.2, 134.1 (q, *J* = 32.3 Hz),

131.4, 129.9, 129.2, 129.0, 128.5, 128.4, 127.5, 126.9, 123.8 (q,  $J = 271.2$  Hz), 122.9 (d,  $J = 11.3$  Hz), 122.9 (d,  $J = 3.8$  Hz), 118.9, 55.8, 27.4.  $^{19}\text{F}$  NMR (376 MHz,  $\text{CDCl}_3$ ):  $\delta = -63.00$ . HRMS (ESI):  $m/z$  calcd for  $\text{C}_{25}\text{H}_{18}\text{F}_3\text{O}_2\text{NNa}$   $[\text{M}+\text{Na}]^+$  : 444.1187, found: 444.1189.

#### 6-fluoro-2-(2-oxopropyl)-3,4-diphenylisoquinolin-1(2*H*)-one (**3ha**)

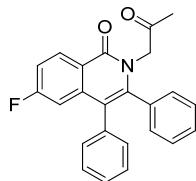

The general procedure was applied to **1h** (0.05 mmol), **2a** (1.5 equiv),  $[\text{Cp}^*\text{RhCl}_2]_2$  (4 mol%),  $\text{Cu}(\text{OAc})_2 \cdot \text{H}_2\text{O}$  (2.1 equiv),  $\text{AgNTf}_2$  (10 mol%),  $\text{PivOH}$  (0.5 equiv) and  $\text{H}_2\text{O}$  (50  $\mu\text{L}$ ) in  $\text{MeOH}$  (0.5 mL) at 100  $^\circ\text{C}$  for 12 h under air. Purification by column chromatography on silica gel (petroleum ether/ethyl acetate = 3/1, v/v) afforded **3ha** as a white solid (35% yield). Melting point: 169.8 – 171.1  $^\circ\text{C}$ ;  $^1\text{H}$  NMR (400 MHz,  $\text{CDCl}_3$ ):  $\delta = 8.51$  (dd,  $J = 8.9, 5.9$  Hz, 1H), 7.24 – 7.16 (m, 7H), 7.12 – 7.06 (m, 4H), 6.80 (dd,  $J = 10.4, 2.5$  Hz, 1H), 4.61 (s, 2H), 2.06 (s, 3H);  $^{13}\text{C}$  NMR (100 MHz,  $\text{CDCl}_3$ ):  $\delta = 201.8, 165.6$  (d,  $J = 250.5$  Hz), 161.6, 142.0, 140.2 (d,  $J = 9.9$  Hz), 135.9, 134.4, 131.4, 131.3 (d,  $J = 9.9$  Hz), 129.9, 128.9, 128.4, 128.3, 127.3, 121.5 (d,  $J = 1.7$  Hz), 118.7 (d,  $J = 3.3$  Hz), 115.5 (d,  $J = 23.5$  Hz), 110.8 (d,  $J = 23.2$  Hz), 55.6, 27.4.  $^{19}\text{F}$  NMR (376 MHz,  $\text{CDCl}_3$ ):  $\delta = -105.39$ . HRMS (ESI):  $m/z$  calcd for  $\text{C}_{24}\text{H}_{19}\text{O}_2\text{NF}$   $[\text{M}+\text{H}]^+$  : 372.1400, found: 372.1404.

#### 6-chloro-2-(2-oxopropyl)-3,4-diphenylisoquinolin-1(2*H*)-one (**3ia**)

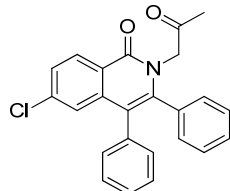

The general procedure was applied to **1i** (0.05 mmol), **2a** (1.5 equiv),  $[\text{Cp}^*\text{RhCl}_2]_2$  (4 mol%),  $\text{Cu}(\text{OAc})_2 \cdot \text{H}_2\text{O}$  (2.1 equiv),  $\text{AgNTf}_2$  (10 mol%),  $\text{PivOH}$  (0.5 equiv) and  $\text{H}_2\text{O}$  (50  $\mu\text{L}$ ) in  $\text{MeOH}$  (0.5 mL) at 100  $^\circ\text{C}$  for 12 h under air. Purification by column chromatography on silica gel (petroleum ether/ethyl acetate = 3/1, v/v) afforded **3ia** as a white solid (41 % yield). Melting point: 175.1 – 177.1  $^\circ\text{C}$ ;  $^1\text{H}$  NMR (400 MHz,  $\text{CDCl}_3$ ):  $\delta = 8.43$  (d,  $J = 8.6$  Hz, 1H), 7.44 (dd,  $J = 8.6, 2.0$  Hz, 1H), 7.24 – 7.15 (m, 6H), 7.14 (d,  $J = 2.0$  Hz, 1H), 7.12 – 7.04 (m, 4H), 4.61 (s, 2H), 2.06 (s, 3H);  $^{13}\text{C}$  NMR (100 MHz,  $\text{CDCl}_3$ ):  $\delta = 201.6, 161.7, 142.1, 139.3, 139.0, 135.7, 134.4, 131.5, 129.9, 128.9, 128.4, 128.3, 127.5, 127.3, 125.0, 123.2, 118.4, 55.7, 27.4$ . HRMS (ESI):  $m/z$  calcd for  $\text{C}_{24}\text{H}_{19}\text{ClO}_2\text{N}$   $[\text{M}+\text{H}]^+$  : 388.1104, found: 388.1104.

#### 1-oxo-2-(2-oxopropyl)-3,4-diphenyl-1,2-dihydroisoquinoline-6-carbonitrile (**3ja**)

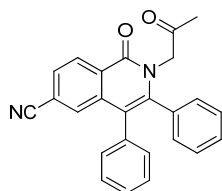

The general procedure was applied to **1j** (0.05 mmol), **2a** (1.5 equiv), [Cp\*RhCl<sub>2</sub>]<sub>2</sub> (4 mol%), Cu(OAc)<sub>2</sub>•H<sub>2</sub>O (2.1 equiv), AgNTf<sub>2</sub> (10 mol%), PivOH (0.5 equiv) and H<sub>2</sub>O (50 μL) in MeOH (0.5 mL) at 100 °C for 12 h under air. Purification by column chromatography on silica gel (petroleum ether/ethyl acetate = 3/1, v/v) afforded **3ja** as a white solid (51 % yield). Melting point: 131.5 – 133.4 °C; <sup>1</sup>H NMR (400 MHz, CDCl<sub>3</sub>): δ = 8.58 (d, *J* = 8.3 Hz, 1H), 7.68 (dd, *J* = 8.3, 1.6 Hz, 1H), 7.50 (d, *J* = 1.5 Hz, 1H), 7.25 – 7.17 (m, 6H), 7.13 – 7.02 (m, 4H), 4.64 (s, 2H), 2.06 (s, 3H); <sup>13</sup>C NMR (100 MHz, CDCl<sub>3</sub>): δ = 201.2, 161.3, 142.9, 137.8, 135.0, 133.9, 131.4, 130.7, 129.8, 129.3, 129.1, 128.6, 128.5, 127.7, 127.1, 118.4, 118.3, 116.1, 55.8, 27.4. HRMS (ESI): *m/z* calcd for C<sub>25</sub>H<sub>19</sub>O<sub>2</sub>N<sub>2</sub> [M+H]<sup>+</sup> : 379.1447, found: 379.1446.

8-methyl-2-(2-oxopropyl)-3,4-diphenylisoquinolin-1(2*H*)-one (**3ka**)

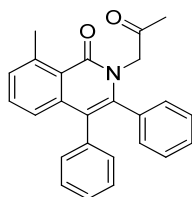

The general procedure was applied to **1k** (0.05 mmol), **2a** (1.5 equiv), [Cp\*RhCl<sub>2</sub>]<sub>2</sub> (4 mol%), Cu(OAc)<sub>2</sub>•H<sub>2</sub>O (2.1 equiv), AgNTf<sub>2</sub> (10 mol%), PivOH (0.5 equiv) and H<sub>2</sub>O (50 μL) in MeOH (0.5 mL) at 100 °C for 12 h under air. Purification by column chromatography on silica gel (petroleum ether/ethyl acetate = 4/1, v/v) afforded **3ka** as a white solid (51% yield). Melting point: 140.1 – 141.1 °C; <sup>1</sup>H NMR (400 MHz, CDCl<sub>3</sub>): δ = 7.36 (t, *J* = 7.7 Hz, 1H), 7.24 (d, *J* = 7.4 Hz, 1H), 7.22 – 7.12 (m, 6H), 7.12 – 7.04 (m, 4H), 6.99 (d, *J* = 8.1 Hz, 1H), 4.57 (s, 2H), 2.97 (s, 3H), 2.07 (s, 3H); <sup>13</sup>C NMR (100 MHz, CDCl<sub>3</sub>): δ = 202.3, 162.9, 142.0, 140.7, 139.4, 137.1, 134.9, 131.7, 130.1, 130.0, 128.5, 128.3, 128.0, 126.9, 124.1, 123.5, 119.1, 55.7, 27.4, 24.4. HRMS (ESI): *m/z* calcd for C<sub>25</sub>H<sub>21</sub>O<sub>2</sub>NNa [M+Na]<sup>+</sup> : 390.1470, found: 390.1469.

2-(2-oxopropyl)-3,4,8-triphenylisoquinolin-1(2*H*)-one (**3la**)

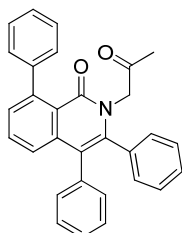

The general procedure was applied to **1l** (0.05 mmol), **2a** (1.5 equiv), [Cp\*RhCl<sub>2</sub>]<sub>2</sub> (4 mol%), Cu(OAc)<sub>2</sub>•H<sub>2</sub>O (2.1 equiv), AgNTf<sub>2</sub> (10 mol%), PivOH (0.5 equiv) and H<sub>2</sub>O (50 μL) in MeOH (0.5 mL) at 100 °C for 12 h under air. Purification by column chromatography on silica gel (petroleum ether/ethyl acetate = 3/1, v/v) afforded **3la** as a white solid (21% yield). Melting point: 221.5 – 224.1 °C; <sup>1</sup>H NMR (400 MHz, CDCl<sub>3</sub>): δ = 7.55 – 7.47 (m, 1H), 7.44 – 7.33 (m, 5H), 7.29 – 7.25 (m, 1H), 7.25 – 7.11 (m, 9H), 7.11 – 7.06 (m, 2H), 4.56 (s, 2H), 1.89 (s, 3H); <sup>13</sup>C NMR (100 MHz, CDCl<sub>3</sub>): δ = 202.0, 161.4, 144.7, 143.9, 141.2, 139.2, 137.0, 134.9, 131.8, 131.2, 130.6, 130.0, 128.6, 128.5, 128.3, 128.1, 127.5, 127.0, 126.6, 125.6, 122.1, 118.8, 55.4, 27.2. HRMS (ESI): *m/z* calcd for C<sub>30</sub>H<sub>23</sub>O<sub>2</sub>NNa [M+Na]<sup>+</sup> : 452.1626, found: 452.1629.

8-fluoro-2-(2-oxopropyl)-3,4-diphenylisoquinolin-1(2*H*)-one (**3ma**)

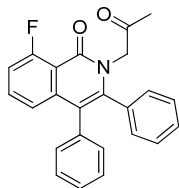

The general procedure was applied to **1m** (0.05 mmol), **2a** (1.5 equiv), [Cp\**RhCl*<sub>2</sub>]<sub>2</sub> (4 mol%), Cu(OAc)<sub>2</sub>•H<sub>2</sub>O (2.1 equiv), AgNTf<sub>2</sub> (10 mol%), PivOH (0.5 equiv) and H<sub>2</sub>O (50 μL) in MeOH (0.5 mL) at 100 °C for 12 h under air. Purification by column chromatography on silica gel (petroleum ether/ethyl acetate = 4/1, v/v) afforded **3ma** as a white solid (50% yield). Melting point: 191.9 – 192.5 °C; <sup>1</sup>H NMR (400 MHz, CDCl<sub>3</sub>): δ = 7.44 (td, *J* = 8.1, 4.9 Hz, 1H), 7.24 – 7.12 (m, 6H), 7.12 – 7.03 (m, 5H), 6.91 (d, *J* = 8.2 Hz, 1H), 4.55 (s, 2H), 2.08 (s, 3H); <sup>13</sup>C NMR (100 MHz, CDCl<sub>3</sub>): δ = 201.8, 162.7 (d, *J* = 262.7 Hz), 159.4 (d, *J* = 4.7 Hz), 142.1, 140.4, 136.3, 134.4, 133.2 (d, *J* = 10 Hz), 131.5, 129.8, 128.8, 128.3, 128.1, 127.1, 121.6 (d, *J* = 4.4 Hz), 118.3 (d, *J* = 2.5 Hz), 114.0 (d, *J* = 4.9 Hz), 113.6 (d, *J* = 21.6 Hz), 55.4, 27.5. <sup>19</sup>F NMR (376 MHz, CDCl<sub>3</sub>): δ = -110.67. HRMS (ESI): *m/z* calcd for C<sub>24</sub>H<sub>19</sub>O<sub>2</sub>FNH [M+H]<sup>+</sup> : 372.1400, found: 372.1396.

7-methyl-2-(2-oxopropyl)-3,4-diphenylisoquinolin-1(2H)-one (**3na**)

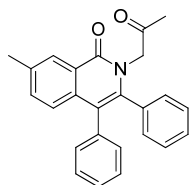

The general procedure was applied to **1n** (0.05 mmol), **2a** (1.2 equiv), [Cp\**RhCl*<sub>2</sub>]<sub>2</sub> (4 mol%), Cu(OAc)<sub>2</sub>•H<sub>2</sub>O (2.1 equiv), AgNTf<sub>2</sub> (10 mol%), PivOH (0.5 equiv) and H<sub>2</sub>O (50 μL) in MeOH (0.5 mL) at 100 °C for 10 h under air. Purification by column chromatography on silica gel (petroleum ether/ethyl acetate = 3/1, v/v) afforded **3na** as a white solid (84% yield). Melting point: 138.8 – 140.4 °C; <sup>1</sup>H NMR (400 MHz, CDCl<sub>3</sub>): δ = 8.31 (s, 1H), 7.35 (dd, *J* = 8.3, 1.9 Hz, 1H), 7.22 – 7.11 (m, 6H), 7.08 (m, 5H), 4.62 (s, 2H), 2.47 (s, 3H), 2.04 (s, 3H); <sup>13</sup>C NMR (100 MHz, CDCl<sub>3</sub>): δ = 201.9, 162.1, 139.6, 136.8, 136.4, 135.2, 134.6, 133.9, 131.4, 130.1, 128.5, 128.2, 127.9, 127.5, 126.8, 125.5, 124.6, 119.0, 55.5, 27.3, 21.4. HRMS (ESI): *m/z* calcd for C<sub>25</sub>H<sub>21</sub>O<sub>2</sub>NNa [M+Na]<sup>+</sup> : 390.1470, found: 390.1470.

7-chloro-2-(2-oxopropyl)-3,4-diphenylisoquinolin-1(2H)-one (**3oa**)

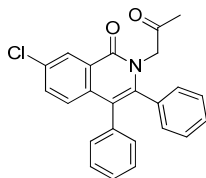

The general procedure was applied to **1o** (0.05 mmol), **2a** (1.5 equiv), [Cp\**RhCl*<sub>2</sub>]<sub>2</sub> (4 mol%), Cu(OAc)<sub>2</sub>•H<sub>2</sub>O (2.1 equiv), AgNTf<sub>2</sub> (10 mol%), PivOH (0.5 equiv) and H<sub>2</sub>O (50 μL) in MeOH (0.5 mL) at 100 °C for 12 h under air. Purification by column chromatography on silica gel (petroleum ether/ethyl acetate = 3/1, v/v) afforded **3oa** as a white solid (49% yield). Melting point: 157.8 – 159.5 °C; <sup>1</sup>H NMR (400 MHz, CDCl<sub>3</sub>): δ = 8.46 (d, *J* = 2.3 Hz, 1H), 7.47 (dd, *J* = 8.7, 2.3 Hz, 1H), 7.18 (m, 6H), 7.14 – 7.04 (m, 5H), 4.62 (s, 2H), 2.05 (s, 3H); <sup>13</sup>C NMR (100 MHz,

CDCl<sub>3</sub>):  $\delta$  = 201.6, 161.3, 141.0, 136.0, 135.9, 134.3, 133.0, 132.9, 131.5, 130.0, 128.8, 128.4, 128.2, 127.5, 127.4, 127.2, 125.9, 118.7, 55.7, 27.4. HRMS (ESI):  $m/z$  calcd for C<sub>24</sub>H<sub>18</sub>O<sub>2</sub>CINNa [M+Na]<sup>+</sup> : 410.0924, found: 410.0925.

### 2-(2-oxopropyl)-3,4-diphenylbenzo[*h*]isoquinolin-1(2*H*)-one (**3pa**)

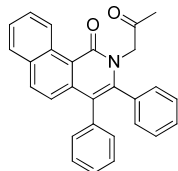

The general procedure was applied to **1p** (0.05 mmol), **2a** (1.5 equiv), [Cp\**Rh*Cl<sub>2</sub>]<sub>2</sub> (4 mol%), Cu(OAc)<sub>2</sub>•H<sub>2</sub>O (2.1 equiv), AgNTf<sub>2</sub> (10 mol%), PivOH (0.5 equiv) and H<sub>2</sub>O (50  $\mu$ L) in MeOH (0.5 mL) at 100 °C for 12 h under air. Purification by column chromatography on silica gel (petroleum ether/ethyl acetate = 3/1, v/v) afforded **3pa** as a white solid (66% yield). Melting point: 161.3 – 162.6 °C; <sup>1</sup>H NMR (400 MHz, CDCl<sub>3</sub>):  $\delta$  = 10.23 (d,  $J$  = 8.7 Hz, 1H), 7.89 (t,  $J$  = 9.2 Hz, 2H), 7.74 (t,  $J$  = 7.1 Hz, 1H), 7.61 (t,  $J$  = 7.4 Hz, 1H), 7.25 – 7.17 (m, 7H), 7.17 – 7.11 (m, 4H), 4.73 (s, 2H), 2.16 (s, 3H); <sup>13</sup>C NMR (100 MHz, CDCl<sub>3</sub>):  $\delta$  = 202.0, 162.4, 142.6, 139.0, 137.0, 134.9, 133.9, 132.3, 132.0, 131.9, 129.9, 128.7, 128.6, 128.4, 128.3, 128.2, 127.8, 127.1, 126.6, 123.6, 119.5, 118.4, 56.3, 27.6. HRMS (ESI):  $m/z$  calcd for C<sub>28</sub>H<sub>21</sub>O<sub>2</sub>NNa [M+Na]<sup>+</sup> : 426.1470, found: 426.1470.

### 6,7-dimethoxy-2-(2-oxopropyl)-3,4-diphenylisoquinolin-1(2*H*)-one (**3qa**)

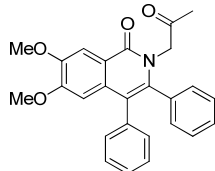

The general procedure was applied to **1q** (0.05 mmol), **2a** (1.5 equiv), [Cp\**Rh*Cl<sub>2</sub>]<sub>2</sub> (4 mol%), Cu(OAc)<sub>2</sub>•H<sub>2</sub>O (2.1 equiv), AgNTf<sub>2</sub> (10 mol%), PivOH (0.5 equiv) and H<sub>2</sub>O (50  $\mu$ L) in MeOH (0.5 mL) at 100 °C for 12 h under air. Purification by column chromatography on silica gel (petroleum ether/ethyl acetate = 3/1, v/v) afforded **3qa** as a white solid (50% yield). Melting point: 252.2 – 253.7 °C; <sup>1</sup>H NMR (400 MHz, CDCl<sub>3</sub>):  $\delta$  = 7.88 (s, 1H), 7.22 – 7.13 (m, 6H), 7.13 – 7.06 (m, 4H), 6.52 (s, 1H), 4.61 (s, 2H), 4.01 (s, 3H), 3.69 (s, 3H), 2.07 (s, 3H); <sup>13</sup>C NMR (100 MHz, CDCl<sub>3</sub>):  $\delta$  = 202.1, 161.5, 153.6, 149.3, 139.4, 136.7, 134.8, 133.2, 131.5, 130.3, 128.6, 128.3, 128.1, 127.0, 118.9, 118.8, 107.9, 106.0, 56.3 (d,  $J$  = 2.6 Hz), 55.9 (d,  $J$  = 2.3 Hz), 55.8, 27.5. HRMS (ESI):  $m/z$  calcd for C<sub>26</sub>H<sub>24</sub>O<sub>4</sub>N [M+H]<sup>+</sup> : 414.1705, found: 414.1699.

### 2-(2-oxo-2-phenylethyl)-3,4-diphenylisoquinolin-1(2*H*)-one (**3ra**)

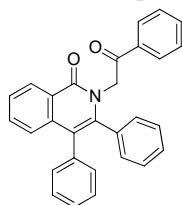



The general procedure was applied to **1r** (0.05 mmol), **2a** (1.5 equiv), [Cp\**RhCl*<sub>2</sub>]<sub>2</sub> (4 mol%), Cu(OAc)<sub>2</sub>•H<sub>2</sub>O (2.1 equiv), AgNTf<sub>2</sub> (10 mol%), PivOH (0.5 equiv) and H<sub>2</sub>O (50 μL) in MeOH (0.5 mL) at 100 °C for 12 h under air. Purification by column chromatography on silica gel (petroleum ether/ethyl acetate = 4/1, v/v) afforded **3ra** as a white solid (62% yield). Melting point: 224.3 – 225.8 °C; <sup>1</sup>H NMR (400 MHz, CDCl<sub>3</sub>): δ = 8.54 (d, *J* = 7.9 Hz, 1H), 7.82 (d, *J* = 7.5 Hz, 2H), 7.60 – 7.47 (m, 3H), 7.40 (t, *J* = 7.7 Hz, 2H), 7.24 – 7.07 (m, 11H), 5.27 (s, 2H); <sup>13</sup>C NMR (100 MHz, CDCl<sub>3</sub>): δ = 193.6, 162.4, 141.0, 137.7, 136.5, 135.2, 134.7, 133.6, 132.5, 131.6, 130.1, 128.7, 128.6, 128.3, 128.1, 128.0, 128.0, 126.9, 126.8, 125.6, 124.9, 119.2, 52.6. HRMS (ESI): *m/z* calcd for C<sub>29</sub>H<sub>21</sub>O<sub>2</sub>NNa [M+Na]<sup>+</sup> : 438.1470, found: 438.1472.

2-(2-oxo-2-phenylethyl)-3,4-diphenylisoquinolin-1(2*H*)-one (**3sa**)

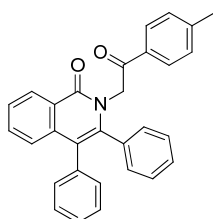

The general procedure was applied to **1s** (0.05 mmol), **2a** (1.5 equiv), [Cp\**RhCl*<sub>2</sub>]<sub>2</sub> (4 mol%), Cu(OAc)<sub>2</sub>•H<sub>2</sub>O (2.1 equiv), AgNTf<sub>2</sub> (10 mol%), PivOH (0.5 equiv) and H<sub>2</sub>O (50 μL) in MeOH (0.5 mL) at 100 °C for 12 h under air. Purification by column chromatography on silica gel (petroleum ether/ethyl acetate = 4/1, v/v) afforded **3sa** as a white solid (29% yield). Melting point: 239.3 – 241.5 °C; <sup>1</sup>H NMR (400 MHz, CDCl<sub>3</sub>): δ = 8.53 (d, *J* = 8, 1H), 7.71 (d, *J* = 8.1 Hz, 2H), 7.60 – 7.47 (m, 2H), 7.23 – 7.08 (m, 13H), 5.24 (s, 2H), 2.38 (s, 3H); <sup>13</sup>C NMR (100 MHz, CDCl<sub>3</sub>): 193.2, 162.5, 144.5, 141.0, 137.7, 136.6, 134.8, 132.8, 132.5, 131.7, 130.2, 129.4, 128.6, 128.3, 128.2, 128.1, 128.1, 127.0, 126.8, 125.7, 125.0, 119.2, 52.5, 21.8. HRMS (ESI): *m/z* calcd for C<sub>30</sub>H<sub>23</sub>O<sub>2</sub>NNa [M+Na]<sup>+</sup> : 452.1626, found: 452.1627.

2-(2-(4-methoxyphenyl)-2-oxoethyl)-3,4-diphenylisoquinolin-1(2*H*)-one (**3ta**)

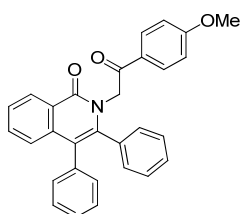

The general procedure was applied to **1t** (0.05 mmol), **2a** (1.5 equiv), [Cp\**RhCl*<sub>2</sub>]<sub>2</sub> (4 mol%), Cu(OAc)<sub>2</sub>•H<sub>2</sub>O (2.1 equiv), AgNTf<sub>2</sub> (10 mol%), PivOH (0.5 equiv) and H<sub>2</sub>O (50 μL) in MeOH (0.5 mL) at 100 °C for 12 h under air. Purification by column chromatography on silica gel (petroleum ether/ethyl acetate = 4/1, v/v) afforded **3ta** as a white solid (42% yield). Melting point: 247.5 – 248.7 °C ; <sup>1</sup>H NMR (400 MHz, CDCl<sub>3</sub>): δ = 8.53 (d, *J* = 7.8 Hz, 1H), 7.81 (d, *J* = 8.6 Hz, 2H), 7.53 (dt, *J* = 26.0, 7.3 Hz, 2H), 7.23 – 7.08 (m, 11H), 6.87 (d, *J* = 8.6 Hz, 2H), 5.23 (s, 2H), 3.84 (s, 3H); <sup>13</sup>C NMR (100 MHz, CDCl<sub>3</sub>): δ = 192.0, 163.9, 162.5, 141.1, 137.7, 136.6, 134.8, 132.5, 131.7, 130.3, 130.2, 128.6, 128.3, 128.2, 128.1, 127.0, 126.8, 125.7, 125.0, 119.2, 113.9, 55.6, 52.3. HRMS (ESI): *m/z* calcd for C<sub>30</sub>H<sub>23</sub>O<sub>3</sub>NNa [M+Na]<sup>+</sup> : 468.1576, found: 468.1576.

2-(2-oxo-2-phenylethyl)-3,4-diphenylisoquinolin-1(2*H*)-one (**3ua**)

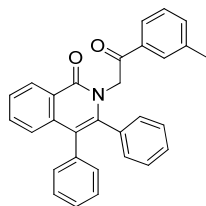

The general procedure was applied to **1u** (0.05 mmol), **2a** (1.5 equiv), [Cp\**RhCl*<sub>2</sub>]<sub>2</sub> (4 mol%), Cu(OAc)<sub>2</sub>•H<sub>2</sub>O (2.1 equiv), AgNTf<sub>2</sub> (10 mol%), PivOH (0.5 equiv) and H<sub>2</sub>O (50 μL) in MeOH (0.5 mL) at 100 °C for 12 h under air. Purification by column chromatography on silica gel (petroleum ether/ethyl acetate = 4/1, v/v) afforded **3ua** as a white solid (20% yield). Melting point: 219.1 – 222.8 °C; <sup>1</sup>H NMR (400 MHz, CDCl<sub>3</sub>): δ = 8.53 (d, *J* = 7.5 Hz, 1H), 7.67 – 7.46 (m, 4H), 7.32 (dd, *J* = 22.5, 7.6 Hz, 2H), 7.24 – 7.09 (m, 11H), 5.24 (s, 2H), 2.36 (s, 3H); <sup>13</sup>C NMR (100 MHz, CDCl<sub>3</sub>): δ = 193.9, 162.4, 141.1, 138.6, 137.7, 136.6, 135.3, 134.8, 134.4, 132.5, 131.7, 130.2, 128.6, 128.6, 128.3, 128.2, 128.1, 127.0, 126.8, 125.7, 125.2, 125.0, 119.3, 52.7, 21.4. HRMS (ESI): *m/z* calcd for C<sub>30</sub>H<sub>23</sub>O<sub>2</sub>NNa [M+Na]<sup>+</sup> : 452.1626, found: 452.1624.

2-(2-(3-methoxyphenyl)-2-oxoethyl)-3,4-diphenylisoquinolin-1(2*H*)-one (**3va**)

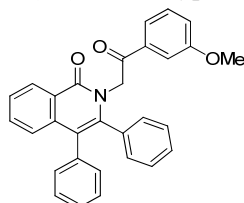

The general procedure was applied to **1v** (0.05 mmol), **2a** (1.5 equiv), [Cp\**RhCl*<sub>2</sub>]<sub>2</sub> (4 mol%), Cu(OAc)<sub>2</sub>•H<sub>2</sub>O (2.1 equiv), AgNTf<sub>2</sub> (10 mol%), PivOH (0.5 equiv) and H<sub>2</sub>O (50 μL) in MeOH (0.5 mL) at 100 °C for 12 h under air. Purification by column chromatography on silica gel (petroleum ether/ethyl acetate = 4/1, v/v) afforded **3va** as a white solid (27% yield). Melting point: 262.7 – 265.4 °C; <sup>1</sup>H NMR (400 MHz, CDCl<sub>3</sub>): δ = 8.53 (d, *J* = 7.9 Hz, 1H), 7.61 – 7.47 (m, 2H), 7.35 (dt, *J* = 5.9, 1.7 Hz, 2H), 7.30 (t, *J* = 8.1 Hz, 1H), 7.25 – 7.05 (m, 12H), 5.24 (s, 2H), 3.82 (s, 3H); <sup>13</sup>C NMR (100 MHz, CDCl<sub>3</sub>): δ = 193.5, 162.4, 159.9, 141.0, 137.7, 136.6, 134.7, 132.6, 131.7, 130.2, 129.8, 128.7, 128.3, 128.2, 128.1, 127.0, 126.9, 125.7, 124.9, 120.5, 120.2, 119.3, 112.3, 55.6, 52.8. HRMS (ESI): *m/z* calcd for C<sub>30</sub>H<sub>23</sub>O<sub>3</sub>NNa [M+Na]<sup>+</sup> : 468.1576, found: 468.1576.

2-(3,3-dimethyl-2-oxobutyl)-3,4-diphenylisoquinolin-1(2*H*)-one (**3wa**)

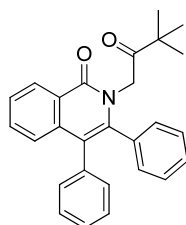

The general procedure was applied to **1w** (0.05 mmol), **2a** (1.5 equiv), [Cp\**RhCl*<sub>2</sub>]<sub>2</sub> (4 mol%), Cu(OAc)<sub>2</sub>•H<sub>2</sub>O (2.1 equiv), AgNTf<sub>2</sub> (10 mol%), PivOH (0.5 equiv), and H<sub>2</sub>O (50 μL) in MeOH (0.5 mL) at 100 °C for 12 h under air. Purification by column chromatography on silica gel (petroleum ether/ethyl acetate = 3/1, v/v) afforded **3wa** as a white solid (60% yield). Melting point:

226.9 – 229.8 °C; <sup>1</sup>H NMR (400 MHz, CDCl<sub>3</sub>): δ = 8.51 (d, *J* = 6.4 Hz, 1H), 7.50 (dt, *J* = 21.9, 6.4 Hz, 2H), 7.23 – 7.03 (m, 11H), 4.89 (s, 2H), 1.01 (s, 9H); <sup>13</sup>C NMR (100 MHz, CDCl<sub>3</sub>): δ = 208.5, 162.3, 140.8, 137.6, 136.5, 134.7, 132.4, 131.6, 130.2, 128.6, 128.1, 128.0, 126.9, 126.7, 125.6, 124.9, 119.1, 51.1, 43.2, 26.4. HRMS (ESI): *m/z* calcd for C<sub>27</sub>H<sub>25</sub>O<sub>2</sub>NNa [M+Na]<sup>+</sup> : 418.1783, found: 418.1783.

1-(2-oxopropyl)-4,5,6-triphenylpyridin-2(1*H*)-one (**3xa**)

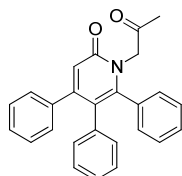

The general procedure was applied to **1x** (0.05 mmol), **2a** (1.5 equiv), [Cp\**Rh*Cl<sub>2</sub>]<sub>2</sub> (4 mol%), Cu(OAc)<sub>2</sub>•H<sub>2</sub>O ( 2.1 equiv), AgNTf<sub>2</sub> (10 mol%), PivOH (0.5 equiv) and H<sub>2</sub>O (50 μL) in MeOH (0.5 mL) at 100 °C for 12 h under air. Purification by column chromatography on silica gel (petroleum ether/ethyl acetate = 2/1, v/v) afforded **3xa** as a white solid (26% yield). Melting point: 160.7 – 161.6 °C; <sup>1</sup>H NMR (400 MHz, CDCl<sub>3</sub>): δ = 7.24 – 7.17 (m, 3H), 7.17 – 7.10 (m, 3H), 7.10 – 6.99 (m, 4H), 6.95 – 6.81 (m, 3H), 6.77 – 6.66 (m, 3H), 4.61 (s, 2H), 2.07 (s, 3H); <sup>13</sup>C NMR (100 MHz, CDCl<sub>3</sub>): δ = 201.4, 161.9, 154.2, 147.3, 138.8, 136.7, 134.4, 131.7, 129.7, 128.9, 128.4, 127.8, 127.4, 126.3, 120.8, 119.0, 55.7, 27.6. HRMS (ESI): *m/z* calcd for C<sub>26</sub>H<sub>21</sub>O<sub>2</sub>NNa [M+Na]<sup>+</sup> : 402.1470, found: 402.1465.

3-methyl-1-(2-oxopropyl)-4,5,6-triphenylpyridin-2(1*H*)-one (**3ya**)

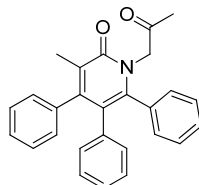

The general procedure was applied to **1y** (0.05 mmol), **2a** (1.5 equiv), [Cp\**Rh*Cl<sub>2</sub>]<sub>2</sub> (4 mol%), Cu(OAc)<sub>2</sub>•H<sub>2</sub>O ( 2.1 equiv), AgNTf<sub>2</sub> (10 mol%), PivOH (0.5 equiv) and H<sub>2</sub>O (50 μL) in MeOH (0.5 mL) at 100 °C for 12 h under air. Purification by column chromatography on silica gel (petroleum ether/ethyl acetate = 2/1, v/v) afforded **3ya** as a white solid (48% yield). Melting point: 188.3 – 193.8 °C; <sup>1</sup>H NMR (400 MHz, CDCl<sub>3</sub>): δ = 7.23 – 7.04 (m, 8H), 6.98 – 6.93 (m, 2H), 6.83 – 6.74 (m, 3H), 6.73 – 6.64 (m, 2H), 4.59 (s, 2H), 2.12 (s, 3H), 2.00 (s, 3H); <sup>13</sup>C NMR (100 MHz, CDCl<sub>3</sub>): δ = 201.7, 162.4, 150.8, 143.6, 138.4, 137.3, 134.5, 131.6, 129.9, 128.9, 128.7, 128.3, 127.7, 127.0, 126.9, 125.8, 125.6, 121.5, 56.2, 27.7, 15.0. HRMS (ESI): *m/z* calcd for C<sub>27</sub>H<sub>23</sub>O<sub>2</sub>NNa [M+Na]<sup>+</sup> : 416.1626, found: 416.1624.

1-(2-oxopropyl)-5,6-diphenyl-4-(*p*-tolyl)pyridin-2(1*H*)-one (**3za**)

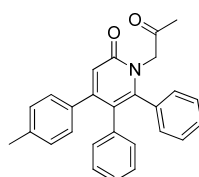

The general procedure was applied to **1z** (0.05 mmol), **2a** (1.5 equiv), [Cp\**RhCl*<sub>2</sub>]<sub>2</sub> (4 mol%), Cu(OAc)<sub>2</sub>•H<sub>2</sub>O (2.1 equiv), AgNTf<sub>2</sub> (10 mol%), PivOH (0.5 equiv) and H<sub>2</sub>O (50 μL) in MeOH (0.5 mL) at 100 °C for 12 h under air. Purification by column chromatography on silica gel (petroleum ether/ethyl acetate = 2/1, v/v) afforded **3za** as a white solid (47% yield). Melting point: 162.3 – 163.9 °C; <sup>1</sup>H NMR (400 MHz, CDCl<sub>3</sub>): δ = 7.23 – 7.15 (m, 3H), 7.11 – 7.04 (m, 2H), 6.94 (s, 4H), 6.92 – 6.86 (m, 3H), 6.78 – 6.72 (m, 2H), 6.70 (s, 1H), 4.60 (s, 2H), 2.24 (s, 3H), 2.07 (s, 3H); <sup>13</sup>C NMR (100 MHz, CDCl<sub>3</sub>): δ = 201.5, 162.0, 154.1, 147.3, 137.7, 136.8, 135.8, 134.5, 131.7, 129.7, 128.9, 128.6, 128.4, 127.4, 126.2, 120.9, 118.9, 55.7, 27.6, 21.3. HRMS (ESI): *m/z* calcd for C<sub>27</sub>H<sub>23</sub>O<sub>2</sub>NNa [M+Na]<sup>+</sup> : 416.1626, found: 416.1626.

2-(2-oxopropyl)-3,4-di-*p*-tolylisoquinolin-1(2*H*)-one (**3ab**)

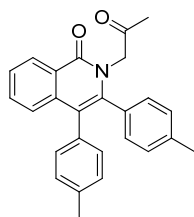

The general procedure was applied to **1a** (0.05 mmol), **2b** (1.5 equiv), [Cp\**RhCl*<sub>2</sub>]<sub>2</sub> (4 mol%), Cu(OAc)<sub>2</sub>•H<sub>2</sub>O (2.1 equiv), AgNTf<sub>2</sub> (10 mol%), PivOH (0.5 equiv) and H<sub>2</sub>O (50 μL) in MeOH (0.5 mL) at 100 °C for 12 h under air. Purification by column chromatography on silica gel (petroleum ether/ethyl acetate = 3/1, v/v) afforded **3ab** as a white solid (75% yield). Melting point: 145.1 – 148.3 °C; <sup>1</sup>H NMR (400 MHz, CDCl<sub>3</sub>): δ = 8.49 (d, *J* = 6.4 Hz, 1H), 7.50 (dt, *J* = 21.1, 7.0 Hz, 2H), 7.17 (d, *J* = 7.5 Hz, 1H), 7.03 – 6.95 (m, 8H), 4.61 (s, 2H), 2.27 (d, *J* = 2.9 Hz, 6H), 2.07 (s, 3H); <sup>13</sup>C NMR (100 MHz, CDCl<sub>3</sub>): δ = 202.0, 162.4, 140.7, 138.4, 137.9, 136.4, 133.4, 132.4, 131.8, 131.4, 129.9, 129.0, 128.8, 127.9, 126.7, 125.7, 124.8, 119.2, 55.7, 27.4, 21.4 (d, *J* = 1.9 Hz), 21.3 (d, *J* = 1.7 Hz). HRMS (ESI): *m/z* calcd for C<sub>26</sub>H<sub>24</sub>O<sub>2</sub>N [M+H]<sup>+</sup> : 382.1807, found: 382.1813.

3,4-bis(4-isopropylphenyl)-2-(2-oxopropyl)isoquinolin-1(2*H*)-one (**3ac**)

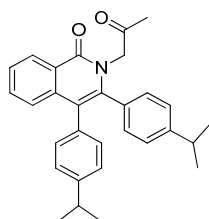

The general procedure was applied to **1a** (0.05 mmol), **2c** (1.5 equiv), [Cp\**RhCl*<sub>2</sub>]<sub>2</sub> (4 mol%), Cu(OAc)<sub>2</sub>•H<sub>2</sub>O (2.1 equiv), AgNTf<sub>2</sub> (10 mol%), PivOH (0.5 equiv) and H<sub>2</sub>O (50 μL) in MeOH (0.5 mL) at 100 °C for 12 h under air. Purification by column chromatography on silica gel (petroleum ether/ethyl acetate = 3/1, v/v) afforded **3ac** as a white solid (63% yield). Melting point: 132 – 137 °C; <sup>1</sup>H NMR (400 MHz, CDCl<sub>3</sub>): δ = 8.51 (d, *J* = 6.4 Hz, 1H), 7.59 – 7.45 (m, 2H), 7.28 (s, 1H), 7.07 – 6.95 (m, 8H), 4.68 (s, 2H), 2.88 – 2.74 (m, 2H), 2.09 (s, 3H), 1.16 (t, *J* = 7.2 Hz, 12H); <sup>13</sup>C NMR (100 MHz, CDCl<sub>3</sub>): δ = 202.1, 162.3, 149.2, 147.3, 140.9, 137.8, 133.7, 132.4, 132.1, 131.4, 130.1, 127.9, 126.7, 126.1, 125.9, 125.8, 124.7, 119.4, 55.7, 33.9, 33.8, 27.5, 24.0, 23.8. HRMS (ESI): *m/z* calcd for C<sub>30</sub>H<sub>32</sub>O<sub>2</sub>N [M+H]<sup>+</sup> : 438.2433, found: 438.2428.

3,4-bis(4-methoxyphenyl)-2-(2-oxopropyl)isoquinolin-1(2*H*)-one (**3ad**)

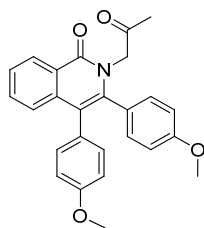

The general procedure was applied to **1a** (0.05 mmol), **2d** (1.2 equiv), [Cp\**RhCl*<sub>2</sub>]<sub>2</sub> (4 mol%), Cu(OAc)<sub>2</sub>•H<sub>2</sub>O (2.1 equiv), AgNTf<sub>2</sub> (10 mol%), PivOH (0.5 equiv) and H<sub>2</sub>O (50 μL) in MeOH (0.5 mL) at 100 °C for 12 h under air. Purification by column chromatography on silica gel (petroleum ether/ethyl acetate = 3/1, v/v) afforded **3ad** as a white solid (76% yield). Melting point: 204.7 – 206.5 °C; <sup>1</sup>H NMR (400 MHz, CDCl<sub>3</sub>): δ = 8.48 (d, *J* = 6.4, 1H), 7.58 – 7.42 (m, 2H), 7.19 (d, *J* = 9.2 Hz, 1H), 7.04 – 6.95 (m, 4H), 6.80 – 6.67 (m, 4H), 4.63 (s, 2H), 3.74 (d, *J* = 4.4 Hz, 6H), 2.08 (s, 3H); <sup>13</sup>C NMR (100 MHz, CDCl<sub>3</sub>): δ = 202.1, 162.4, 159.4, 158.3, 140.7, 138.0, 132.6, 132.5, 131.3, 128.8, 128.0, 127.2, 126.7, 125.7, 124.8, 119.2, 113.7, 113.5, 55.7, 55.3 (d, *J* = 2.7), 55.2 (d, *J* = 2.6), 27.5. HRMS (ESI): *m/z* calcd for C<sub>26</sub>H<sub>23</sub>O<sub>4</sub>NNa [M+Na]<sup>+</sup>: 436.1525, found: 436.1530.

3,4-bis(4-fluorophenyl)-2-(2-oxopropyl)isoquinolin-1(2*H*)-one (**3ae**)

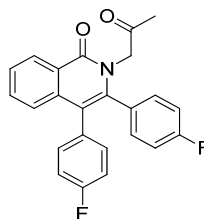

The general procedure was applied to **1a** (0.05 mmol), **2e** (1.2 equiv), [Cp\**RhCl*<sub>2</sub>]<sub>2</sub> (4 mol%), Cu(OAc)<sub>2</sub>•H<sub>2</sub>O (2.1 equiv), AgNTf<sub>2</sub> (10 mol%), PivOH (0.5 equiv) and H<sub>2</sub>O (50 μL) in MeOH (0.5 mL) at 100 °C for 10 h under air. Purification by column chromatography on silica gel (petroleum ether/ethyl acetate = 3/1, v/v) afforded **3ae** as a white solid (71% yield). Melting point: 172.5 – 173.8 °C; <sup>1</sup>H NMR (400 MHz, CDCl<sub>3</sub>): δ = 8.48 (d, *J* = 7.5 Hz, 1H), 7.53 (dt, *J* = 24.6, 7.4 Hz, 2H), 7.18 – 6.98 (m, 5H), 6.90 (t, *J* = 8.5 Hz, 4H), 4.61 (s, 2H), 2.08 (s, 3H); <sup>13</sup>C NMR (100 MHz, CDCl<sub>3</sub>): δ = 201.8, 162.5 (d, *J* = 248.3 Hz), 162.1, 161.8 (d, *J* = 245.2 Hz), 139.9, 137.4, 133.1 (d, *J* = 7.9 Hz), 132.7, 132.2 (d, *J* = 3.4 Hz), 132.0 (d, *J* = 8.1 Hz), 130.5 (d, *J* = 3.7 Hz), 128.1, 127.1, 125.4, 124.9, 118.5, 115.6 (d, *J* = 21.5 Hz), 115.3 (d, *J* = 21.4 Hz), 55.5, 27.5. <sup>19</sup>F NMR (376 MHz, CDCl<sub>3</sub>): δ = -111.32, -114.74. HRMS (ESI): *m/z* calcd for C<sub>24</sub>H<sub>17</sub>O<sub>2</sub>F<sub>2</sub>NNa [M+Na]<sup>+</sup>: 412.1125, found: 412.1127.

3,4-bis(4-chlorophenyl)-2-(2-oxopropyl)isoquinolin-1(2*H*)-one (**3af**)

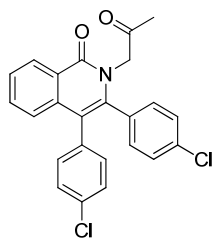

The general procedure was applied to **1a** (0.05 mmol), **2f** (1.2 equiv), [Cp\*RhCl<sub>2</sub>]<sub>2</sub> (4 mol%), Cu(OAc)<sub>2</sub>•H<sub>2</sub>O (2.1 equiv), AgNTf<sub>2</sub> (10 mol%), PivOH (0.5 equiv) and H<sub>2</sub>O (50 μL) in MeOH (0.5 mL) at 100 °C for 12 h under air. Purification by column chromatography on silica gel (petroleum ether/ethyl acetate = 3/1, v/v) afforded **3af** as a white solid (58% yield). Melting point: 197.3 – 200.6 °C; <sup>1</sup>H NMR (400 MHz, CDCl<sub>3</sub>): δ = 8.48 (d, *J* = 6.4 Hz, 1H), 7.61 – 7.47 (m, 2H), 7.20 (d, *J* = 7.5 Hz, 4H), 7.11 (d, *J* = 7.3 Hz, 1H), 7.03 (dd, *J* = 14.2, 8.4 Hz, 4H), 4.59 (s, 2H), 2.10 (s, 3H); <sup>13</sup>C NMR (100 MHz, CDCl<sub>3</sub>): δ = 201.8, 162.1, 139.6, 137.1, 135.1, 134.6, 133.3, 132.8, 131.4, 128.9, 128.6, 128.2, 127.3, 125.4, 124.9, 118.2, 55.6, 27.6. HRMS (ESI): *m/z* calcd for C<sub>24</sub>H<sub>17</sub>Cl<sub>2</sub>O<sub>2</sub>NNa [M+Na]<sup>+</sup>: 444.0534, found: 444.0528.

### 3,4-bis(4-bromophenyl)-2-(2-oxopropyl)isoquinolin-1(2H)-one (**3ag**)

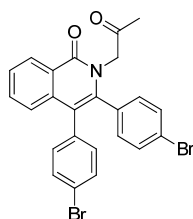

The general procedure was applied to **1a** (0.05 mmol), **2g** (1.5 equiv), [Cp\*RhCl<sub>2</sub>]<sub>2</sub> (4 mol%), Cu(OAc)<sub>2</sub>•H<sub>2</sub>O (2.1 equiv), AgNTf<sub>2</sub> (10 mol%), PivOH (0.5 equiv) and H<sub>2</sub>O (50 μL) in MeOH (0.5 mL) at 100 °C for 12 h under air. Purification by column chromatography on silica gel (petroleum ether/ethyl acetate = 3/1, v/v) afforded **3ag** as a white solid (62% yield). Melting point: 219.3 – 220.7 °C; <sup>1</sup>H NMR (400 MHz, CDCl<sub>3</sub>): δ = 8.48 (d, *J* = 7.8 Hz, 1H), 7.63 – 7.47 (m, 2H), 7.36 (dd, *J* = 8.4, 2.6 Hz, 4H), 7.11 (d, *J* = 8.7 Hz, 1H), 6.97 (dd, *J* = 12.8, 8.4 Hz, 4H), 4.58 (s, 2H), 2.10 (s, 3H); <sup>13</sup>C NMR (100 MHz, CDCl<sub>3</sub>): δ = 201.8, 162.1, 139.6, 137.0, 135.1, 133.2, 133.1, 132.8, 131.8, 131.6, 131.6, 128.1, 127.3, 125.4, 124.9, 123.4, 121.6, 118.1, 55.6, 27.6. HRMS (ESI): *m/z* calcd for C<sub>24</sub>H<sub>17</sub>O<sub>2</sub>NBr<sub>2</sub>Na [M+Na]<sup>+</sup>: 531.9524, found: 531.9526.

### 2-(2-oxopropyl)-3,4-bis(4-(trifluoromethyl)phenyl)isoquinolin-1(2H)-one (**3ah**)

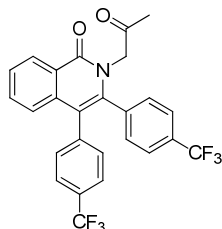

The general procedure was applied to **1a** (0.05 mmol), **2h** (1.5 equiv), [Cp\*RhCl<sub>2</sub>]<sub>2</sub> (4 mol%), Cu(OAc)<sub>2</sub>•H<sub>2</sub>O (2.1 equiv), AgNTf<sub>2</sub> (10 mol%), PivOH (0.5 equiv) and H<sub>2</sub>O (50 μL) in MeOH (0.5 mL) at 100 °C for 12 h under air. Purification by column chromatography on silica gel (petroleum ether/ethyl acetate = 3/1, v/v) afforded **3ah** as a white solid (39% yield). Melting point:

210.7 – 213.1 °C; <sup>1</sup>H NMR (400 MHz, CDCl<sub>3</sub>): δ = 8.49 (d, *J* = 7.8 Hz, 1H), 7.60 – 7.50 (m, 2H), 7.50 – 7.44 (m, 4H), 7.22 (dd, *J* = 19.7, 8.1 Hz, 4H), 7.05 (d, *J* = 8.4 Hz, 1H), 4.55 (s, 2H), 2.09 (s, 3H); <sup>13</sup>C NMR (100 MHz, CDCl<sub>3</sub>): δ = 201.7, 162.1, 139.9, 139.4, 137.8, 136.8, 133.1, 131.9, 131.3 (d, *J* = 33.0 Hz), 130.6, 129.7 (d, *J* = 32.4 Hz), 129.6, 128.3, 127.7, 125.6 (d, *J* = 10.7 Hz), 125.6 (d, *J* = 3.7 Hz), 125.4 (d, *J* = 11 Hz), 125.4 (d, *J* = 3.9 Hz), 125.0, 124.0 (q, *J* = 271.0 Hz), 123.6 (q, *J* = 271.0 Hz), 118.2, 55.6, 27.6. <sup>19</sup>F NMR (376 MHz, CDCl<sub>3</sub>): δ = -62.72, -62.99. HRMS (ESI): *m/z* calcd for C<sub>26</sub>H<sub>17</sub>O<sub>2</sub>F<sub>6</sub>NNa [M+Na]<sup>+</sup> :512.1061, found:512.1060.

### 2-(2-oxopropyl)-3,4-di-*m*-tolylisoquinolin-1(2*H*)-one (**3ai**)

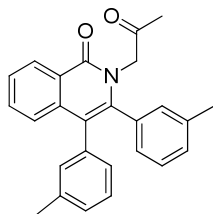

The general procedure was applied to **1a** (0.05 mmol), **2i** (1.2 equiv), [Cp\**RhCl*<sub>2</sub>]<sub>2</sub> (4 mol%), Cu(OAc)<sub>2</sub>•H<sub>2</sub>O (2.1 equiv), AgNTf<sub>2</sub> (10 mol%), PivOH (0.5 equiv) and H<sub>2</sub>O (50 μL) in MeOH (0.5 mL) at 100 °C for 10 h under air. Purification by column chromatography on silica gel (petroleum ether/ethyl acetate = 3/1, v/v) afforded **3ai** as a white solid (75% yield). Melting point: 152.9 – 154.4 °C; <sup>1</sup>H NMR (400 MHz, CDCl<sub>3</sub>): δ = 8.50 (d, *J* = 7.5 Hz, 1H), 7.51 (dt, *J* = 25.2, 7.0 Hz, 2H), 7.19 (d, *J* = 8.0 Hz, 1H), 7.12 – 7.04 (m, 2H), 7.00 (d, *J* = 7.7 Hz, 1H), 6.98 – 6.86 (m, 5H), 4.70 – 4.53 (m, 2H), 2.22 (s, 6H), 2.07 (s, 3H); <sup>13</sup>C NMR (100 MHz, CDCl<sub>3</sub>): δ = 201.9, 162.3, 140.7, 137.9 (d, *J* = 7.2 Hz), 137.7, 137.4 (d, *J* = 6.9 Hz), 136.3, 134.6, 132.5, 132.3 (d, *J* = 6.5 Hz), 130.7 (d, *J* = 7.2 Hz), 129.3 (d, *J* = 2.1 Hz), 128.6, 128.1 (d, *J* = 7.7 Hz), 128.0, 127.8 (d, *J* = 6 Hz), 127.7 (d, *J* = 1.5 Hz), 127.1 (d, *J* = 3.6 Hz), 126.8, 125.7, 124.8, 119.2, 55.7, 27.4, 21.4 (d, *J* = 1.1 Hz), 21.3 (d, *J* = 2.4 Hz). HRMS (ESI): *m/z* calcd for C<sub>26</sub>H<sub>23</sub>O<sub>2</sub>NNa [M+Na]<sup>+</sup> : 404.1626, found: 404.1630.

### 3,4-bis(3-methoxyphenyl)-2-(2-oxopropyl)isoquinolin-1(2*H*)-one (**3aj**)

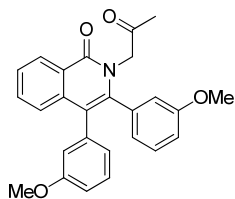

The general procedure was applied to **1a** (0.05 mmol), **2j** (1.2 equiv), [Cp\**RhCl*<sub>2</sub>]<sub>2</sub> (4 mol%), Cu(OAc)<sub>2</sub>•H<sub>2</sub>O (2.1 equiv), AgNTf<sub>2</sub> (10 mol%), PivOH (0.5 equiv) and H<sub>2</sub>O (50 μL) in MeOH (0.5 mL) at 100 °C for 10 h under air. Purification by column chromatography on silica gel (petroleum ether/ethyl acetate = 3/1, v/v) afforded **3aj** as a white solid (78% yield). Melting point: 174.2 – 175.6 °C; <sup>1</sup>H NMR (400 MHz, CDCl<sub>3</sub>): δ = 8.49 (d, *J* = 7.9 Hz, 1H), 7.60 – 7.45 (m, 2H), 7.22 (dd, *J* = 8.6, 4.2 Hz, 1H), 7.12 (qd, *J* = 8.1, 2.1 Hz, 2H), 6.81 – 6.67 (m, 5H), 6.63 (s, 1H), 4.73 – 4.53 (m, 2H), 3.68 (d, *J* = 3.8 Hz, 3H), 3.65 (d, *J* = 2.6 Hz, 3H), 2.10 (s, 3H); <sup>13</sup>C NMR (100 MHz, CDCl<sub>3</sub>): δ = 202.0 (d, *J* = 1.5 Hz), 202.0, 162.3, 159.3 (d, *J* = 6.2 Hz), 140.3, 137.7 (d, *J* = 2.1 Hz), 137.5 (d, *J* = 2.1 Hz), 135.8 (d, *J* = 2.4 Hz), 132.6, 129.5 (d, *J* = 9.5 Hz), 129.0 (d, *J* = 7.4 Hz), 128.0, 126.9, 125.7, 124.8, 124.1 (d, *J* = 8.8 Hz), 122.4 (d, *J* = 12.2 Hz), 118.9, 116.9 (d,

$J = 7.2$  Hz), 115.3 (d,  $J = 14.6$  Hz), 114.9, 113.0, 55.7 (d,  $J = 2.7$  Hz), 55.4, 55.3, 27.5. HRMS (ESI):  $m/z$  calcd for  $C_{26}H_{24}O_4N$   $[M+H]^+$  : 414.1705, found: 414.1704.

### 3,4-bis(3-chlorophenyl)-2-(2-oxopropyl)isoquinolin-1(2*H*)-one (**3ak**)

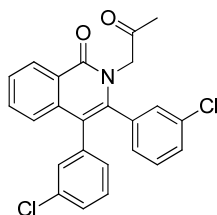

The general procedure was applied to **1a** (0.05 mmol), **2k** (1.2 equiv),  $[Cp^*RhCl_2]_2$  (4 mol%),  $Cu(OAc)_2 \cdot H_2O$  (2.1 equiv),  $AgNTf_2$  (10 mol%),  $PivOH$  (0.5 equiv) and  $H_2O$  (50  $\mu$ L) in MeOH (0.5 mL) at 100 °C for 12 h under air. Purification by column chromatography on silica gel (petroleum ether/ethyl acetate = 3/1, v/v) afforded **3ak** as a white solid (37% yield). Melting point: 154.1 – 155.9 °C;  $^1H$  NMR (400 MHz,  $CDCl_3$ ):  $\delta = 8.49$  (d,  $J = 7.9$  Hz, 1H), 7.70 – 7.46 (m, 2H), 7.25 – 7.08 (m, 7H), 7.08 – 6.94 (m, 2H), 4.80 – 4.46 (m, 2H), 2.11 (s, 3H);  $^{13}C$  NMR (100 MHz,  $CDCl_3$ ):  $\delta = 201.7$  (d,  $J = 1.8$  Hz), 162.1, 139.4, 137.9 (d,  $J = 2.0$  Hz), 136.9, 135.9, 134.5 (d,  $J = 14.9$  Hz), 134.1 (d,  $J = 13$  Hz), 132.9, 131.5 (d,  $J = 10.3$  Hz), 130.0 (d,  $J = 8.9$  Hz), 129.8, 129.6 (d,  $J = 8.6$  Hz), 129.3, 128.3 (d,  $J = 8$  Hz), 128.2, 127.6, 127.4, 125.5, 124.9, 118.1, 55.6, 27.5. HRMS (ESI):  $m/z$  calcd for  $C_{24}H_{17}O_2NCl_2Na$   $[M+Na]^+$  : 444.0534, found: 444.0534.

### 3,4-dibutyl-2-(2-oxopropyl)isoquinolin-1(2*H*)-one (**3al**)

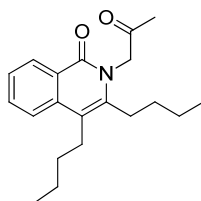

The general procedure was applied to **1a** (0.05 mmol), **2l** (1.2 equiv),  $[Cp^*RhCl_2]_2$  (4 mol%),  $Cu(OAc)_2 \cdot H_2O$  (2.1 equiv),  $AgNTf_2$  (10 mol%),  $PivOH$  (0.5 equiv) and  $H_2O$  (50  $\mu$ L) in MeOH (0.5 mL) at 100 °C for 10 h under air. Purification by column chromatography on silica gel (petroleum ether/ethyl acetate = 3/1, v/v) afforded **3al** as a white solid (81% yield). Melting point: 107.6 – 110.3 °C;  $^1H$  NMR (400 MHz,  $CDCl_3$ ):  $\delta = 8.40$  (d,  $J = 8.0$  Hz, 1H), 7.66 (d,  $J = 3.8$  Hz, 2H), 7.46 – 7.39 (m, 1H), 4.91 (s, 2H), 2.72 (t,  $J = 7.2$  Hz, 2H), 2.54 (t,  $J = 7.2$  Hz, 2H), 2.28 (s, 3H), 1.52 (m, 8H), 1.03 – 0.93 (q,  $J = 6.8$  Hz, 6H);  $^{13}C$  NMR (100 MHz,  $CDCl_3$ ):  $\delta = 202.8$ , 162.7, 139.0, 137.0, 132.5, 128.5, 126.0, 124.7, 122.9, 114.5, 53.9, 32.6, 31.5, 29.7, 27.6, 27.6 (d,  $J = 1.6$  Hz), 23.2, 23.0, 14.1, 13.8. HRMS (ESI):  $m/z$  calcd for  $C_{20}H_{27}O_2NNa$   $[M+Na]^+$  : 336.1939, found: 336.1938.

### 3,4-diethyl-2-(2-oxopropyl)isoquinolin-1(2*H*)-one (**3am**)

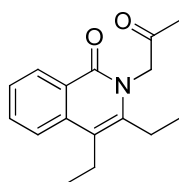



The general procedure was applied to **1a** (0.05 mmol), **2m** (2 equiv), [Cp\*RhCl<sub>2</sub>]<sub>2</sub> (4 mol%), Cu(OAc)<sub>2</sub>•H<sub>2</sub>O (3 equiv), AgNTf<sub>2</sub> (10 mol%), PivOH (0.5 equiv) and H<sub>2</sub>O (50 μL) in MeOH (0.5 mL) at 100 °C for 12 h under air. Purification by column chromatography on silica gel (petroleum ether/ethyl acetate = 3/1, v/v) afforded **3am** as a white solid (95% yield). Melting point: 105.3 – 106.8 °C; <sup>1</sup>H NMR (400 MHz, CDCl<sub>3</sub>): δ = 8.40 (d, *J* = 7.5 Hz, 1H), 7.73 – 7.61 (m, 2H), 7.42 (t, *J* = 7.3 Hz, 1H), 4.92 (s, 2H), 2.78 (q, *J* = 7.5 Hz, 2H), 2.61 (q, *J* = 7.6 Hz, 2H), 2.29 (s, 3H), 1.22 (dt, *J* = 12.2, 7.5 Hz, 6H); <sup>13</sup>C NMR (100 MHz, CDCl<sub>3</sub>): δ = 202.7, 162.7, 139.9, 136.8, 132.6, 128.5, 126.0, 124.8, 122.8, 115.4, 53.7, 27.6, 22.9, 20.8, 14.9, 13.8. HRMS (ESI): *m/z* calcd for C<sub>16</sub>H<sub>19</sub>O<sub>2</sub>NNa [M+Na]<sup>+</sup> : 280.1313, found: 280.1314.

#### 2-(2-oxopropyl)-3,4-di(thiophen-2-yl)isoquinolin-1(2*H*)-one (**3an**)

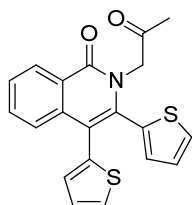

The general procedure was applied to **1a** (0.05 mmol), **2n** (1.5 equiv), [Cp\*RhCl<sub>2</sub>]<sub>2</sub> (4 mol%), Cu(OAc)<sub>2</sub>•H<sub>2</sub>O (2.1 equiv), AgNTf<sub>2</sub> (10 mol%), PivOH (0.5 equiv) and H<sub>2</sub>O (50 μL) in MeOH (0.5 mL) at 100 °C for 12 h under air. Purification by column chromatography on silica gel (petroleum ether/ethyl acetate = 3/1, v/v) afforded **3an** as a white solid (52% yield). Melting point: 164.3 – 167.9 °C; <sup>1</sup>H NMR (400 MHz, CDCl<sub>3</sub>): 8.47 (d, *J* = 6.4 Hz, 1H), 7.60 (t, *J* = 7.6 Hz, 1H), 7.52 (t, *J* = 7.5 Hz, 1H), 7.38 (d, *J* = 8.1 Hz, 1H), 7.31 (t, *J* = 2.8 Hz, 1H), 7.28 – 7.23 (m, 1H), 6.96 – 6.87 (m, 3H), 6.85 (d, *J* = 2.9 Hz, 1H), 4.72 (s, 2H), 2.13 (s, 3H); <sup>13</sup>C NMR (100 MHz, CDCl<sub>3</sub>): δ = 201.8, 162.2, 137.5, 136.8, 135.6, 134.4, 132.9, 130.9, 130.2, 129.9, 128.4, 128.0, 127.7, 126.9, 126.7, 126.6, 125.8, 125.1, 114.8, 55.8, 27.4. HRMS (ESI): *m/z* calcd for C<sub>20</sub>H<sub>15</sub>O<sub>2</sub>NS<sub>2</sub>Na [M+Na]<sup>+</sup> : 388.0442, found: 388.0445.

#### 4-methyl-2-(2-oxopropyl)-3-phenylisoquinolin-1(2*H*)-one (**3ao**)

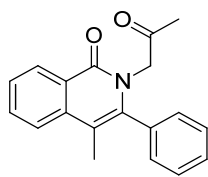

The general procedure was applied to **1a** (0.05 mmol), **2o** (1.5 equiv), [Cp\*RhCl<sub>2</sub>]<sub>2</sub> (4 mol%), Cu(OAc)<sub>2</sub>•H<sub>2</sub>O (2.1 equiv), AgNTf<sub>2</sub> (10 mol%), PivOH (0.5 equiv) and H<sub>2</sub>O (50 μL) in MeOH (0.5 mL) at 100 °C for 10 h under air. Purification by column chromatography on silica gel (petroleum ether/ethyl acetate = 3/1, v/v) afforded **3ao** as a white solid (91% yield). Melting point: 153.2 – 154.1 °C; <sup>1</sup>H NMR (400 MHz, CDCl<sub>3</sub>): δ = 8.48 (d, *J* = 8.0 Hz, 1H), 7.75 – 7.67 (m, 2H), 7.55 – 7.49 (m, 1H), 7.47 – 7.43 (m, 3H), 7.25 – 7.20 (m, 2H), 4.54 (s, 2H), 2.01 (d, *J* = 2.2 Hz, 6H); <sup>13</sup>C NMR (100 MHz, CDCl<sub>3</sub>): δ = 202.0, 162.2, 139.5, 137.5, 135.4, 132.7, 129.9, 129.6, 129.2, 129.1, 128.3, 126.7, 125.2, 123.5, 115.4, 110.8, 55.6, 27.3, 14.9. HRMS (ESI): *m/z* calcd for C<sub>19</sub>H<sub>17</sub>O<sub>2</sub>NNa [M+Na]<sup>+</sup> : 314.1157, found: 314.1158.

#### 1-oxo-2-(2-oxopropyl)-3-phenyl-1,2-dihydroisoquinoline-4-carbaldehyde (**3ap**)

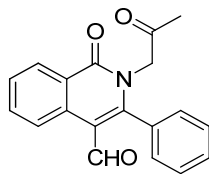

The general procedure was applied to **1a** (0.05 mmol), **2p** (1.2 equiv), [Cp\*RhCl<sub>2</sub>]<sub>2</sub> (4 mol%), Cu(OAc)<sub>2</sub>•H<sub>2</sub>O (2.1 equiv), AgNTf<sub>2</sub> (10 mol%), PivOH (0.5 equiv) and H<sub>2</sub>O (50 μL) in MeOH (0.5 mL) at 100 °C for 12 h under air. Purification by column chromatography on silica gel (petroleum ether/ethyl acetate = 3/1, v/v) afforded **3ap** as a white solid (64% yield). Melting point: 188.5 – 190.7 °C; <sup>1</sup>H NMR (400 MHz, CDCl<sub>3</sub>): δ = 9.44 (s, 1H), 9.18 (d, *J* = 8.4 Hz, 1H), 8.42 (d, *J* = 8.1 Hz, 1H), 7.78 (t, *J* = 7.7 Hz, 1H), 7.63 – 7.46 (m, 4H), 7.34 (d, *J* = 7.3 Hz, 2H), 4.58 (s, 2H), 2.06 (s, 3H); <sup>13</sup>C NMR (100 MHz, CDCl<sub>3</sub>): δ = 200.7, 191.3, 162.1, 156.6, 134.2, 133.4, 131.4, 130.5, 129.5, 129.2, 128.0, 127.9, 125.6, 124.3, 113.8, 55.0, 27.4. HRMS (ESI): *m/z* calcd for C<sub>19</sub>H<sub>15</sub>O<sub>3</sub>NNa [M+Na]<sup>+</sup> : 328.0950, found: 328.0948.

#### 4-(1-hydroxyethyl)-2-(2-oxopropyl)-3-phenylisoquinolin-1(2H)-one (**3aq**)

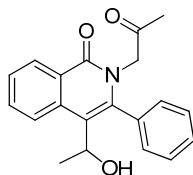

The general procedure was applied to **1a** (0.05 mmol), **2q** (1.2 equiv), [Cp\*RhCl<sub>2</sub>]<sub>2</sub> (4 mol%), Cu(OAc)<sub>2</sub>•H<sub>2</sub>O (2.1 equiv), AgNTf<sub>2</sub> (10 mol%), PivOH (0.5 equiv) and H<sub>2</sub>O (50 μL) in MeOH (0.5 mL) at 100 °C for 12 h under air. Purification by column chromatography on silica gel (petroleum ether/ethyl acetate = 3/1, v/v) afforded **3aq** as a white solid (60% yield). Melting point: 167.9 – 169.2 °C; <sup>1</sup>H NMR (400 MHz, CDCl<sub>3</sub>): δ = 8.55 (d, *J* = 8.4 Hz, 1H), 8.46 (d, *J* = 8.0 Hz, 1H), 7.68 (t, *J* = 7.7 Hz, 1H), 7.52 – 7.37 (m, 4H), 7.13 (d, *J* = 6.6 Hz, 2H), 4.64 (q, *J* = 6.7 Hz, 1H), 4.49 – 4.22 (m, 2H), 2.38 (s, 1H), 1.94 (s, 3H), 1.54 (d, *J* = 6.7 Hz, 3H); <sup>13</sup>C NMR (100 MHz, CDCl<sub>3</sub>): δ = 201.9, 162.1, 139.6, 135.1, 134.5, 132.1, 129.5, 129.4, 129.1, 128.7, 128.5, 126.8, 126.5, 126.0, 117.8, 68.5, 55.3, 27.3, 22.7. HRMS (ESI): *m/z* calcd for C<sub>20</sub>H<sub>19</sub>O<sub>3</sub>NNa [M+Na]<sup>+</sup> : 344.1263, found: 344.1263.

#### 4-(2-methylallyl)-2-(2-oxopropyl)-3-phenylisoquinolin-1(2H)-one (**3ar**)

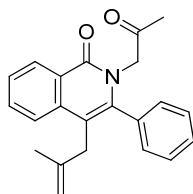

The general procedure was applied to **1a** (0.05 mmol), **2r** (1.2 equiv), [Cp\*RhCl<sub>2</sub>]<sub>2</sub> (4 mol%), Cu(OAc)<sub>2</sub>•H<sub>2</sub>O (2.1 equiv), AgNTf<sub>2</sub> (10 mol%), PivOH (0.5 equiv) and H<sub>2</sub>O (50 μL) in MeOH (0.5 mL) at 100 °C for 12 h under air. Purification by column chromatography on silica gel (petroleum ether/ethyl acetate = 3/1, v/v) afforded **3ar** as a white solid (88% yield). Melting point: 153.2 – 154.9 °C; <sup>1</sup>H NMR (400 MHz, CDCl<sub>3</sub>): δ = 8.47 (d, *J* = 6.8 Hz, 1H), 7.66 (ddd, *J* = 8.3, 6.9, 1.5 Hz, 1H), 7.59 (d, *J* = 7.0 Hz, 1H), 7.49 (ddd, *J* = 8.1, 6.9, 1.2 Hz, 1H), 7.46 – 7.39 (m, 3H),

7.26 – 7.22 (m, 2H), 4.80-4.75 (m, 1H), 4.55 (s, 2H), 4.51 (s, 1H), 3.04 (s, 2H), 2.02 (s, 3H), 1.65 (s, 3H);  $^{13}\text{C}$  NMR (100 MHz,  $\text{CDCl}_3$ ):  $\delta$  = 201.9, 162.3, 144.0, 140.9, 137.1, 134.9, 132.5, 129.3, 129.1, 128.9, 128.3, 126.7, 125.3, 124.4, 112.9, 111.8, 55.7, 36.8, 27.3, 23.4. HRMS (ESI):  $m/z$  calcd for  $\text{C}_{22}\text{H}_{21}\text{O}_2\text{NNa}$   $[\text{M}+\text{Na}]^+$  : 354.1470, found: 354.1474.

## 9. $^1\text{H}$ , $^{13}\text{C}$ and $^{19}\text{F}$ NMR spectra

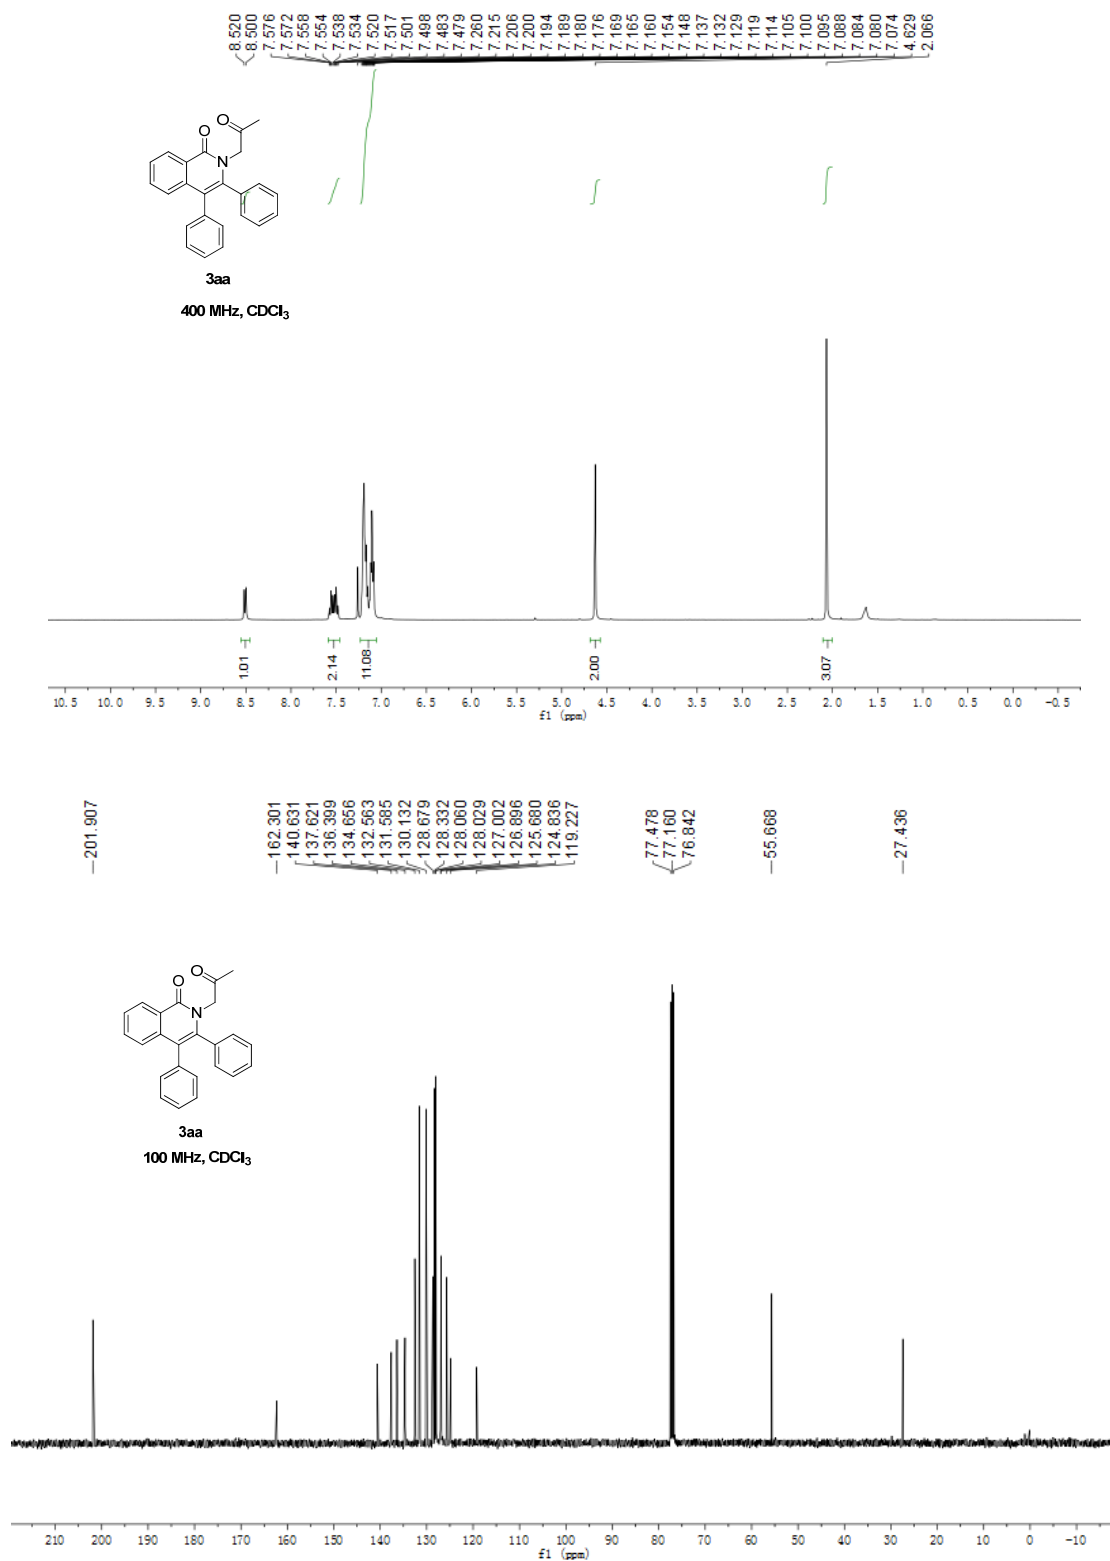

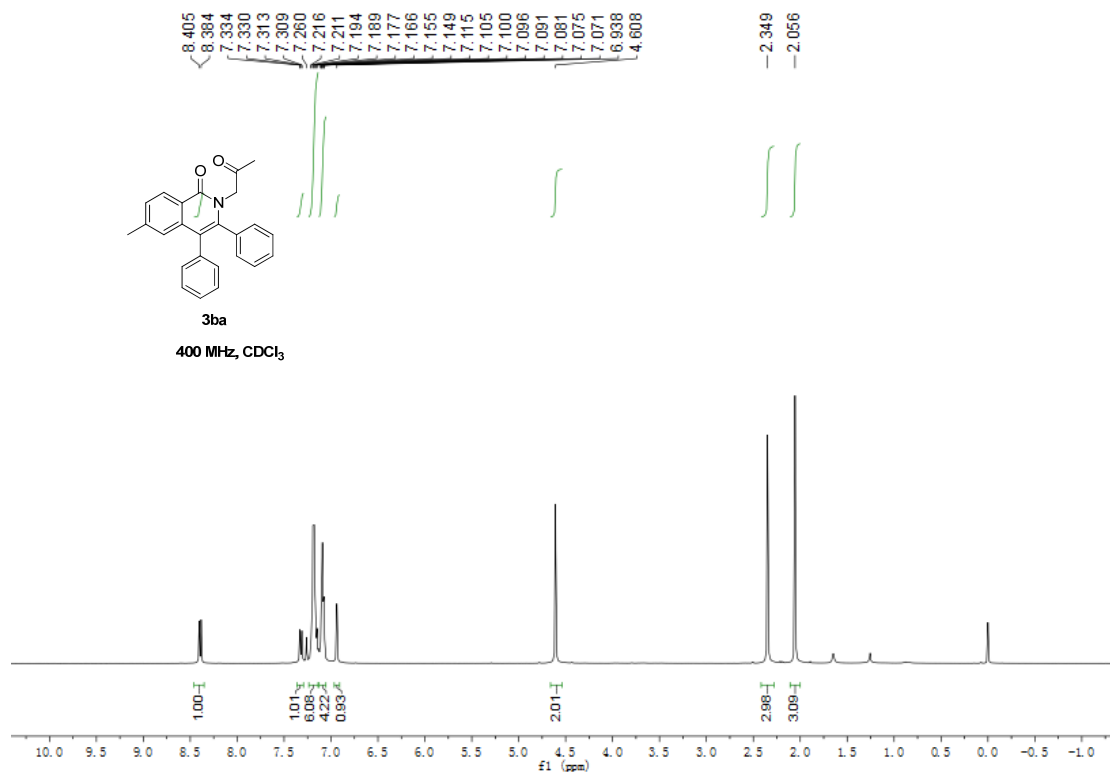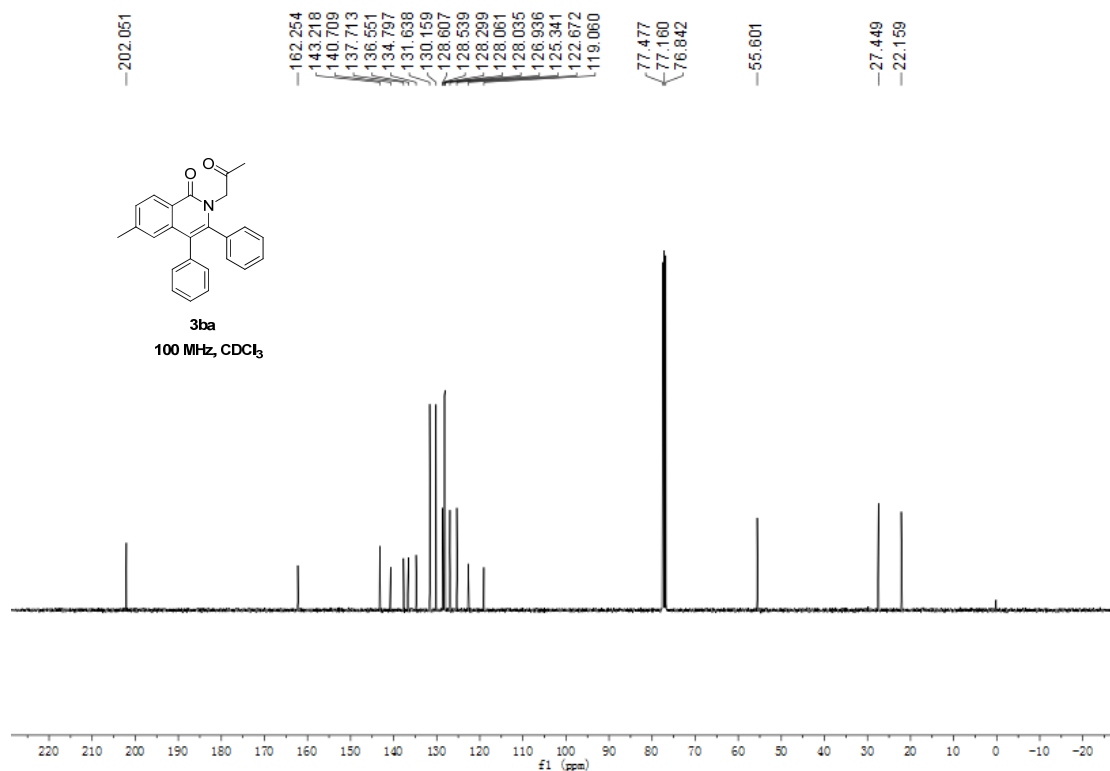

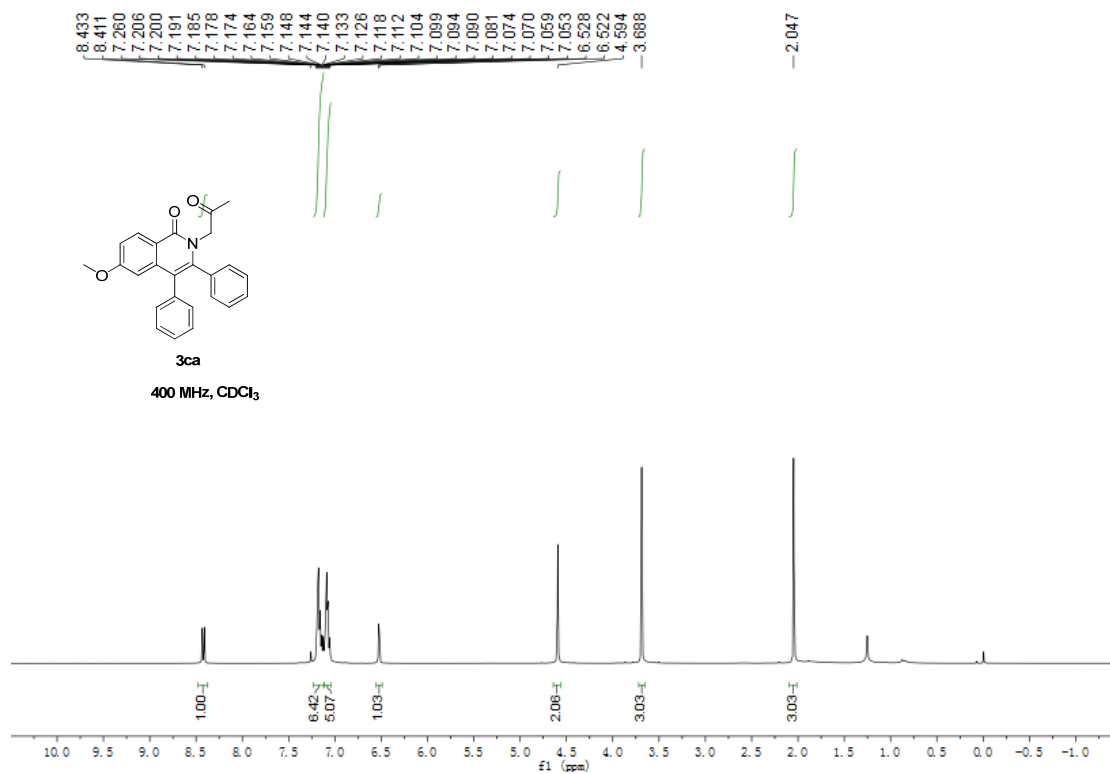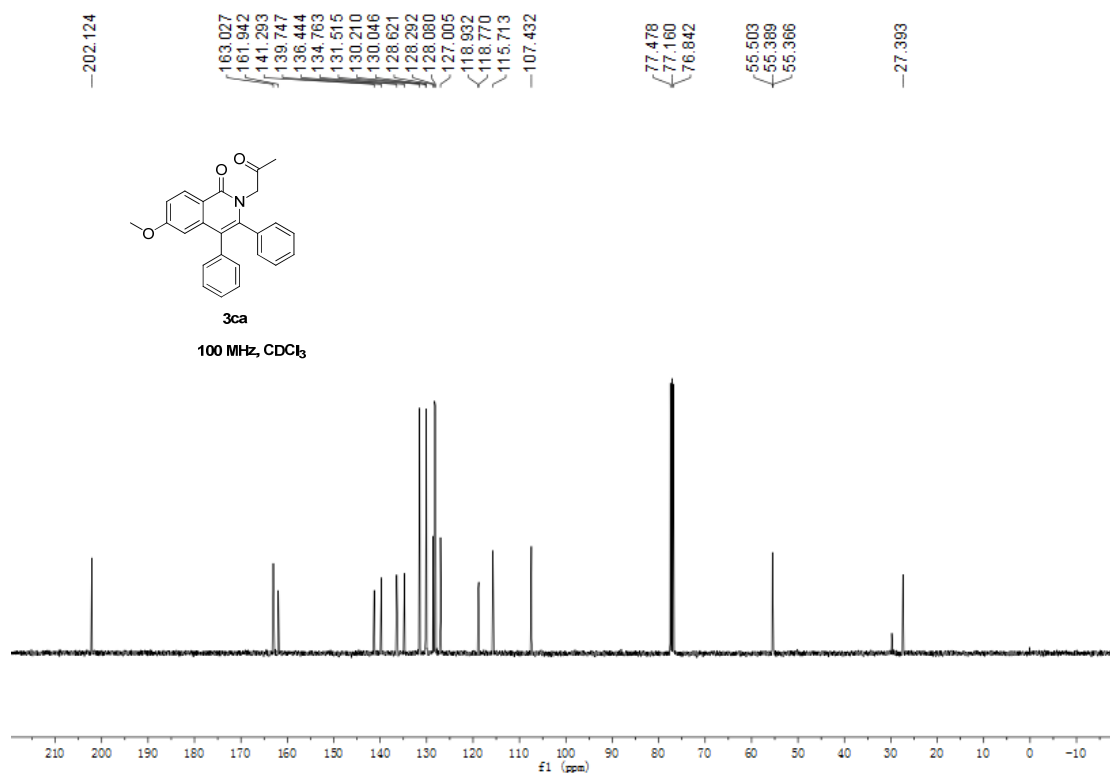

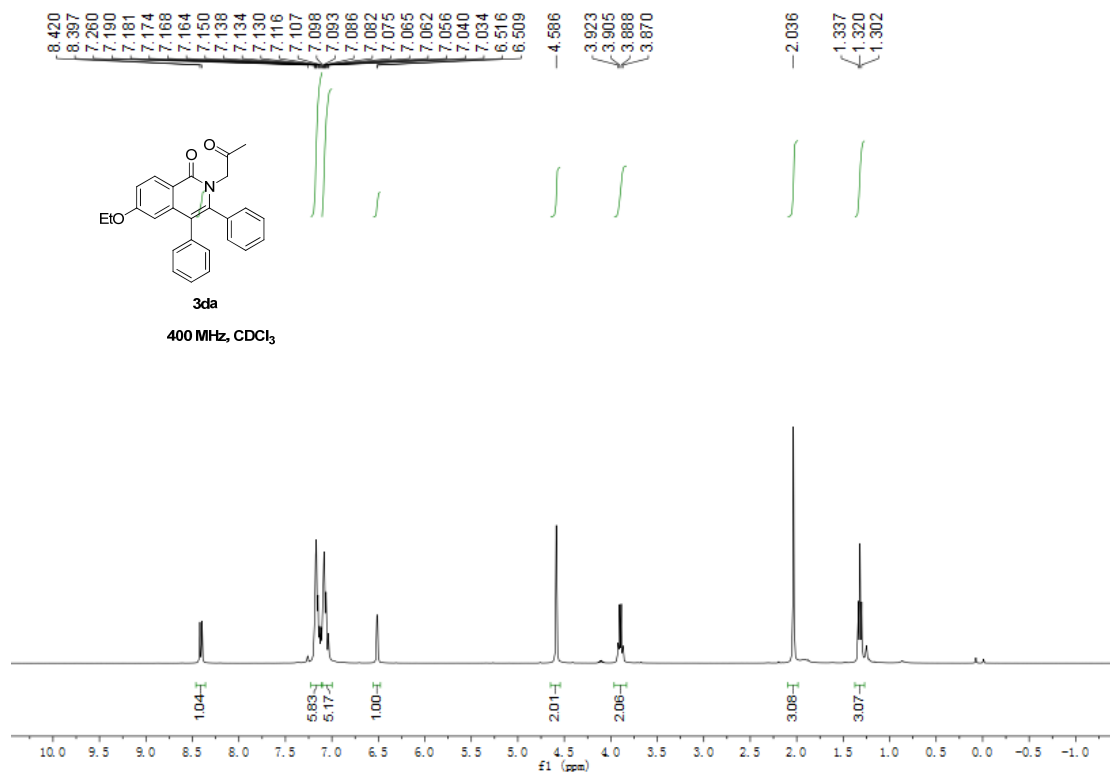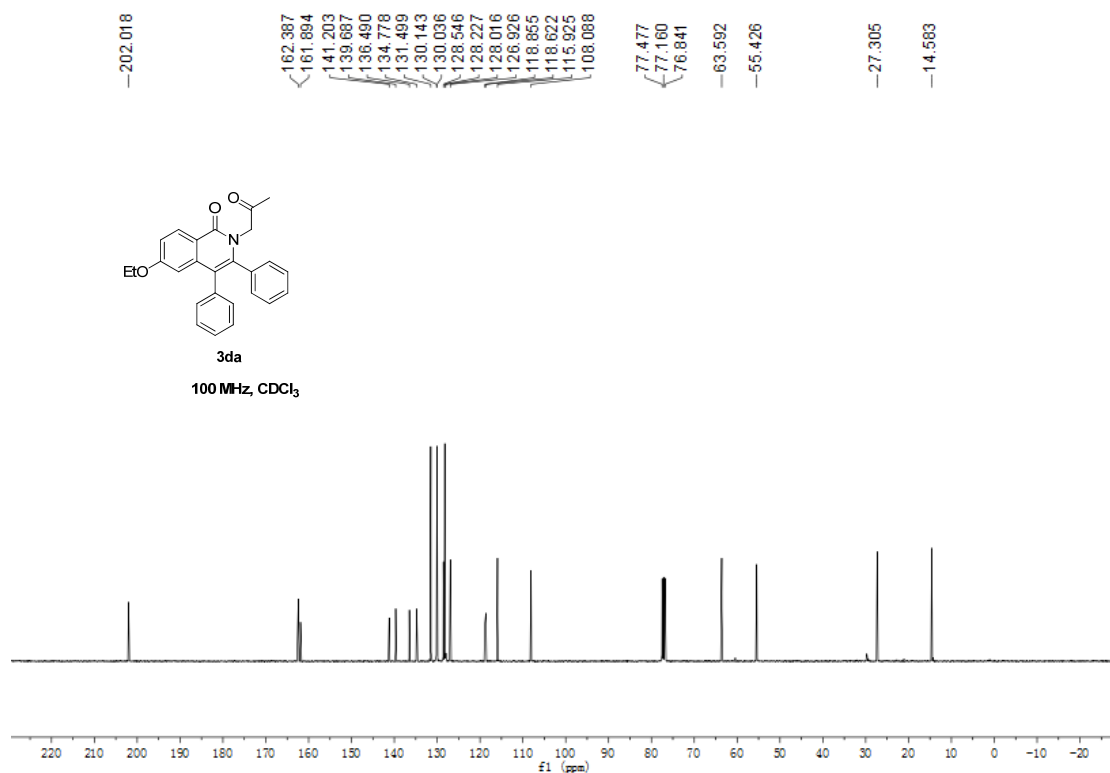

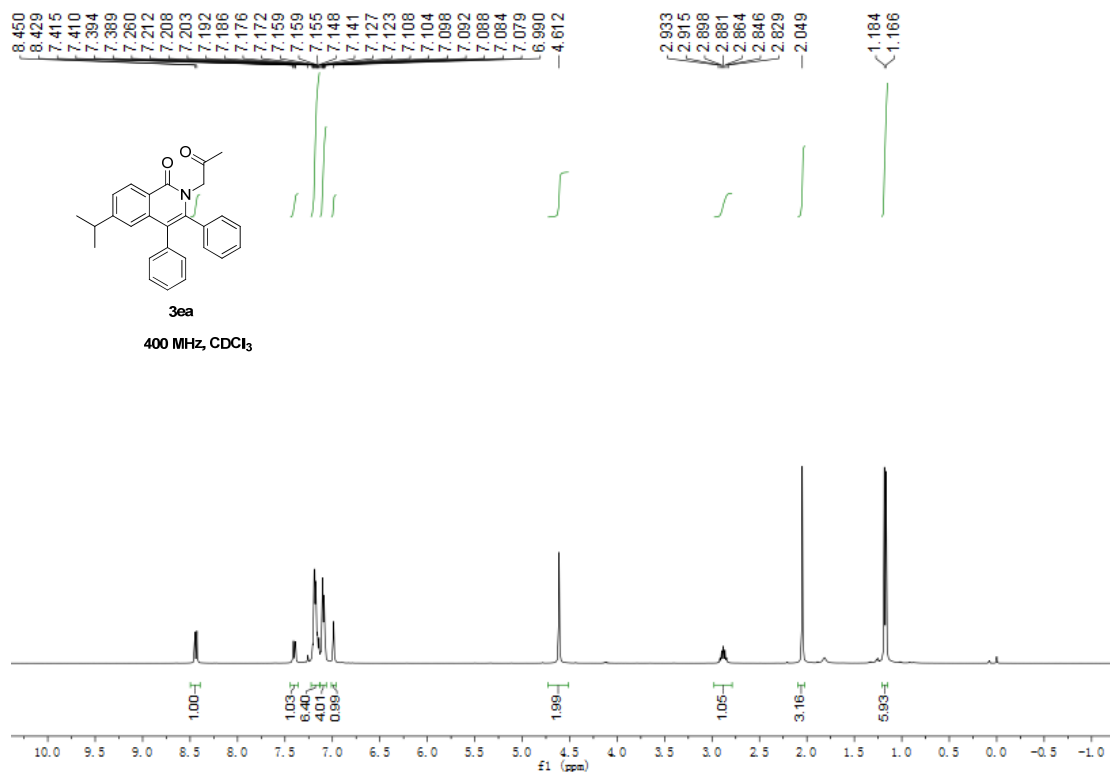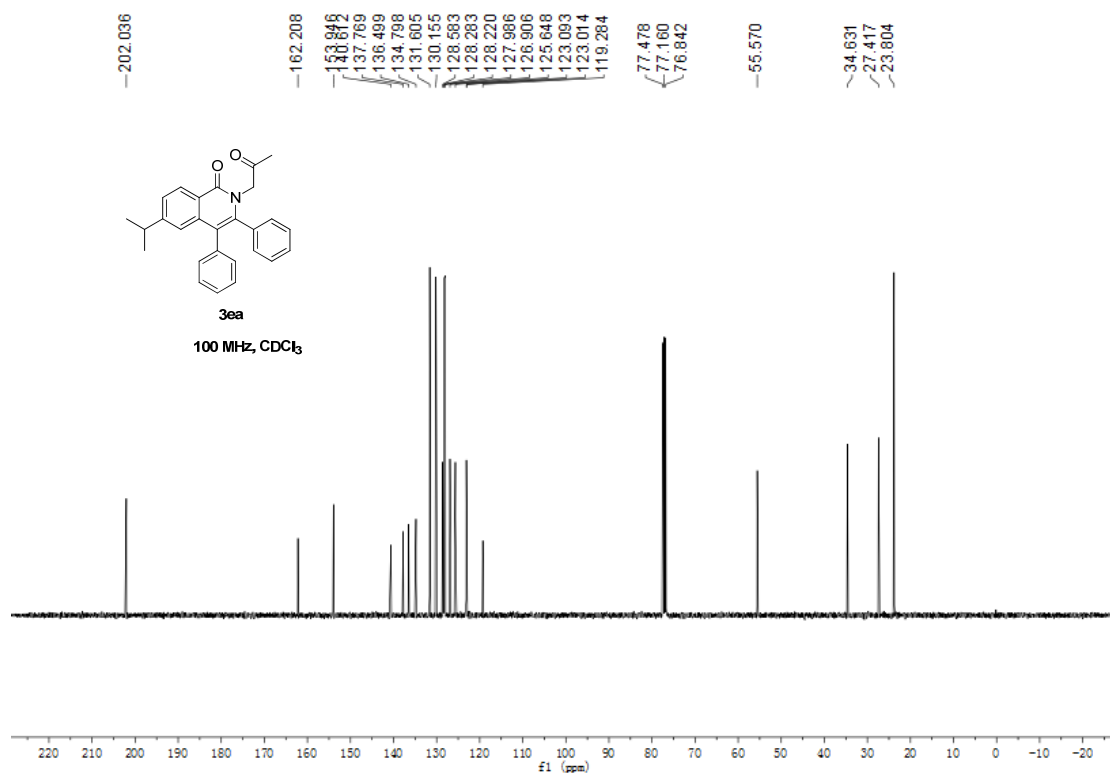

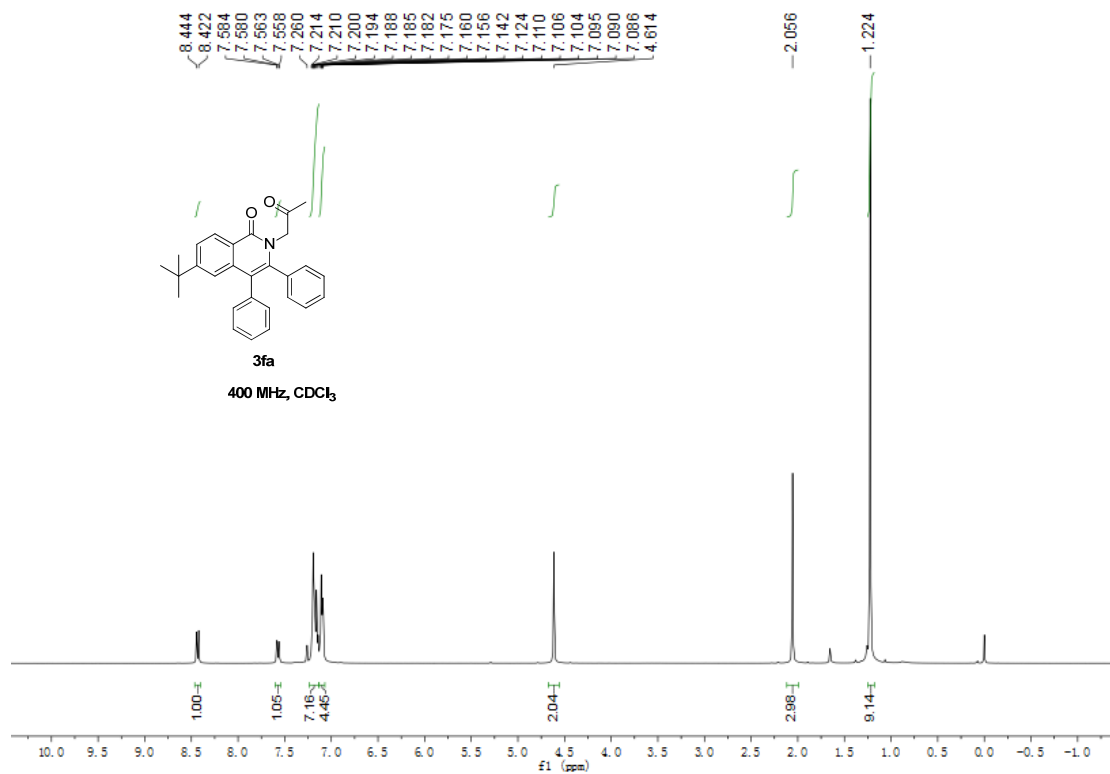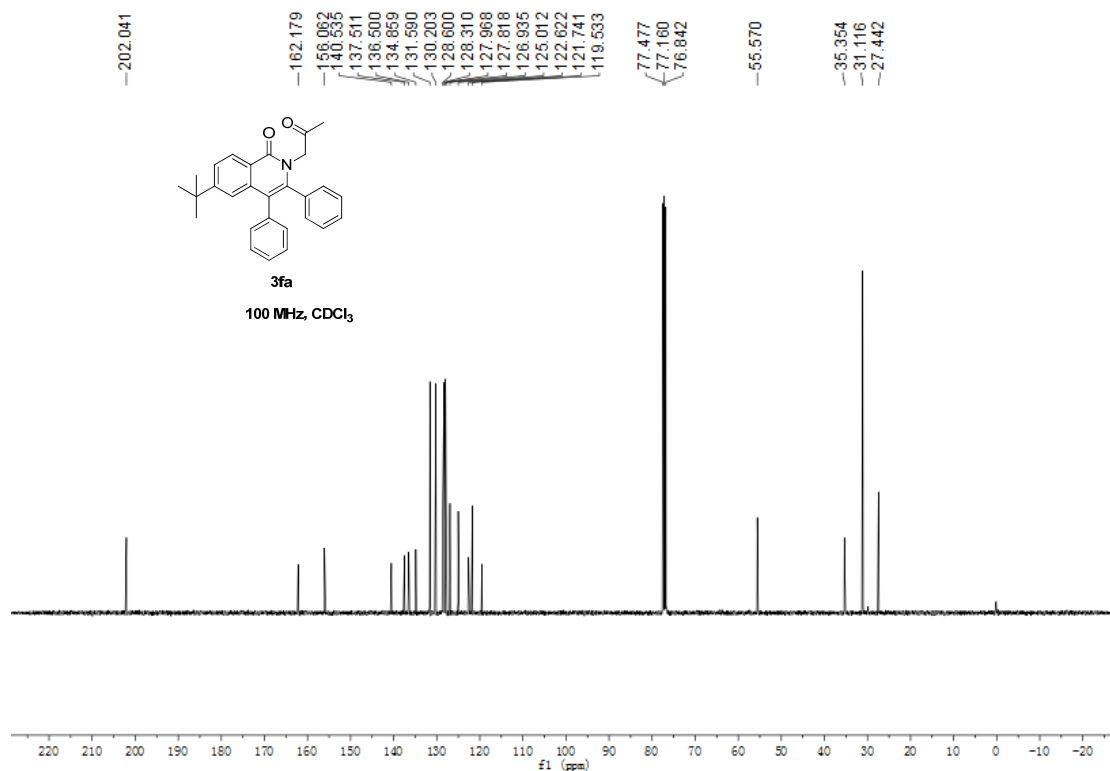



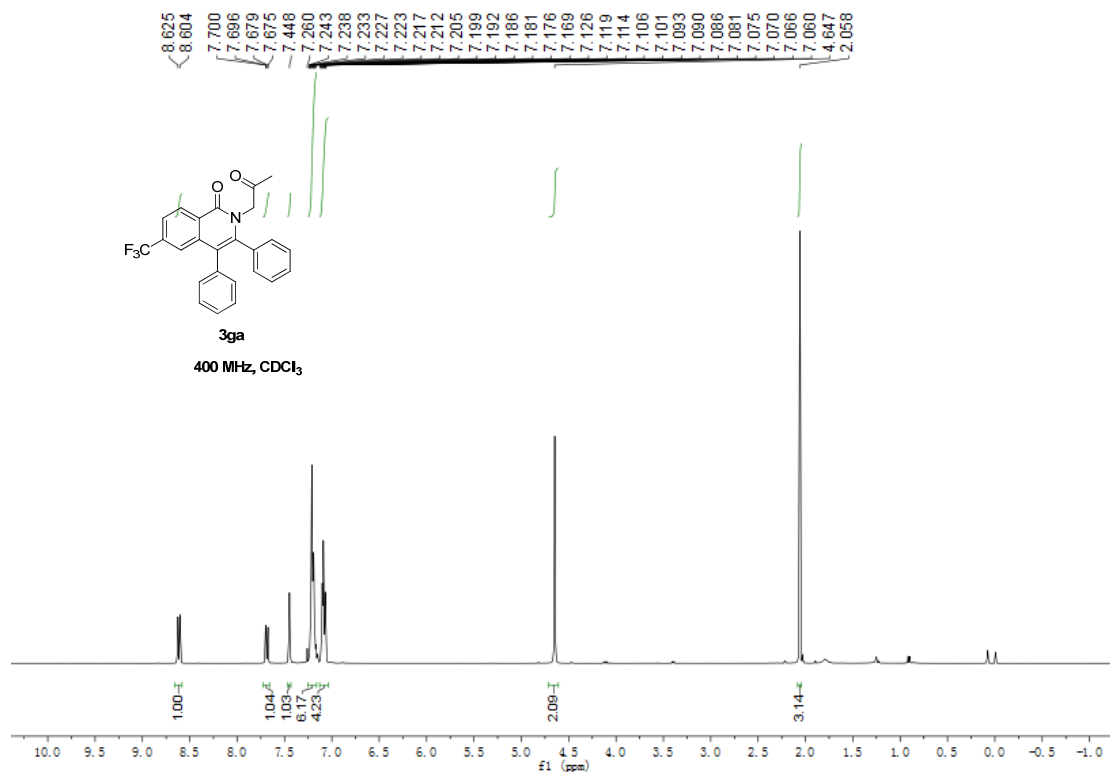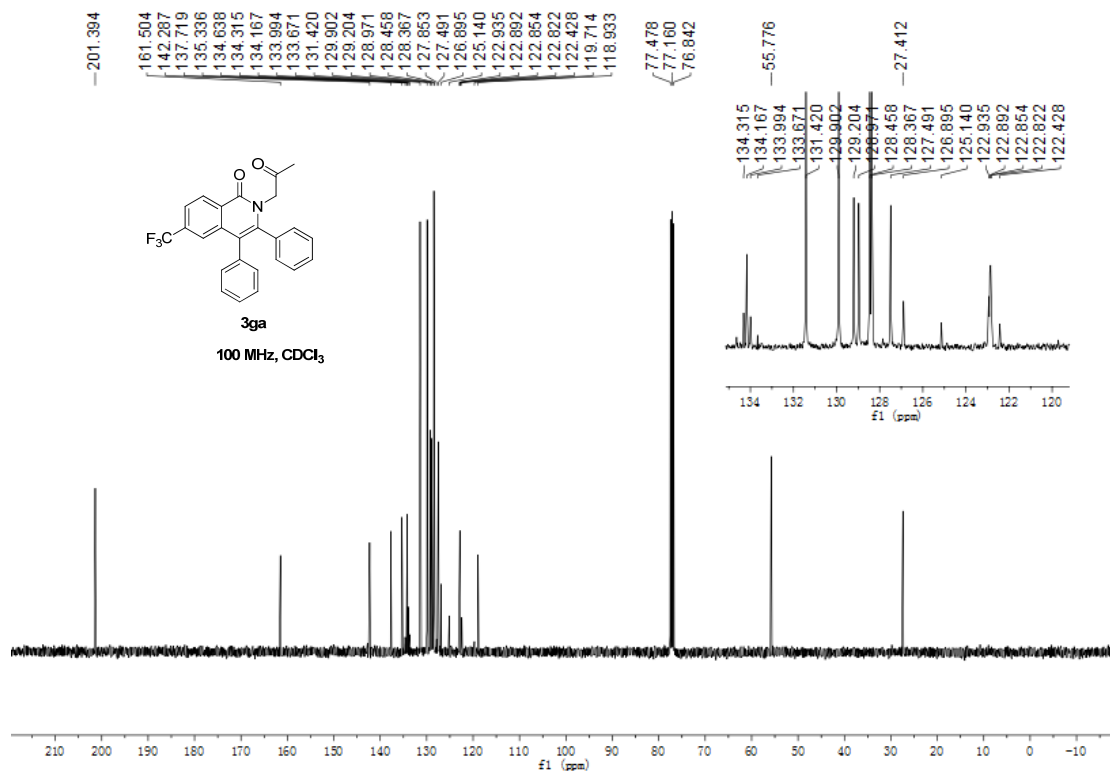

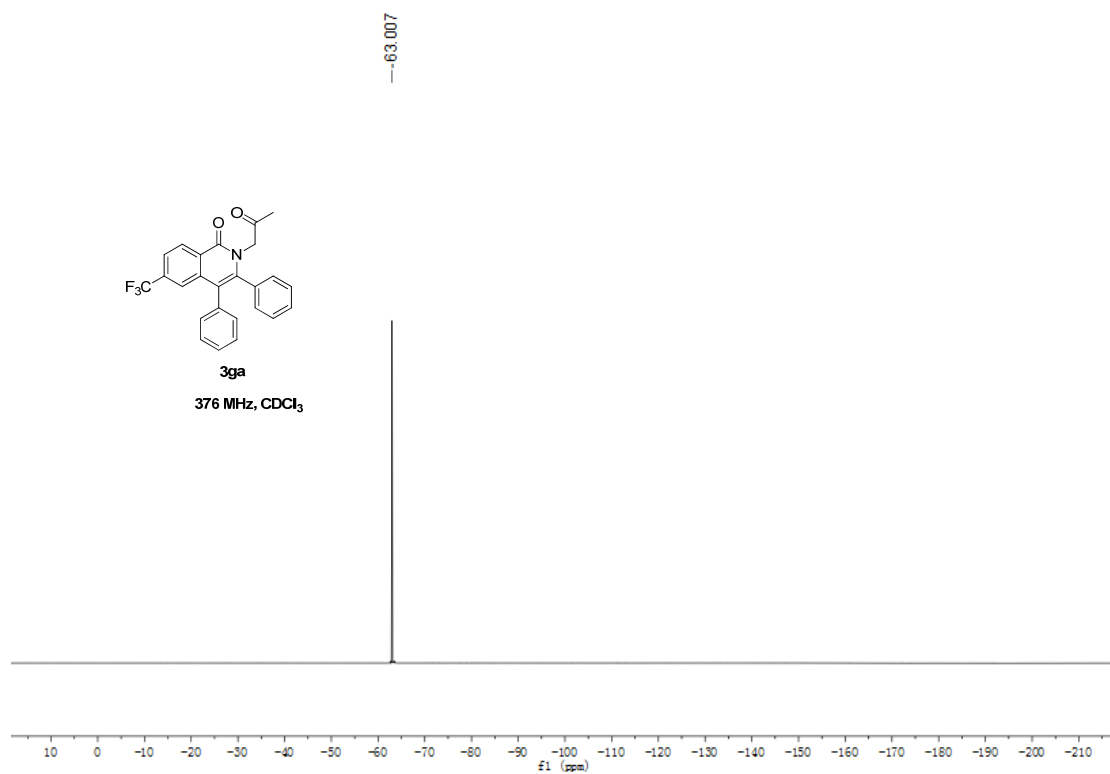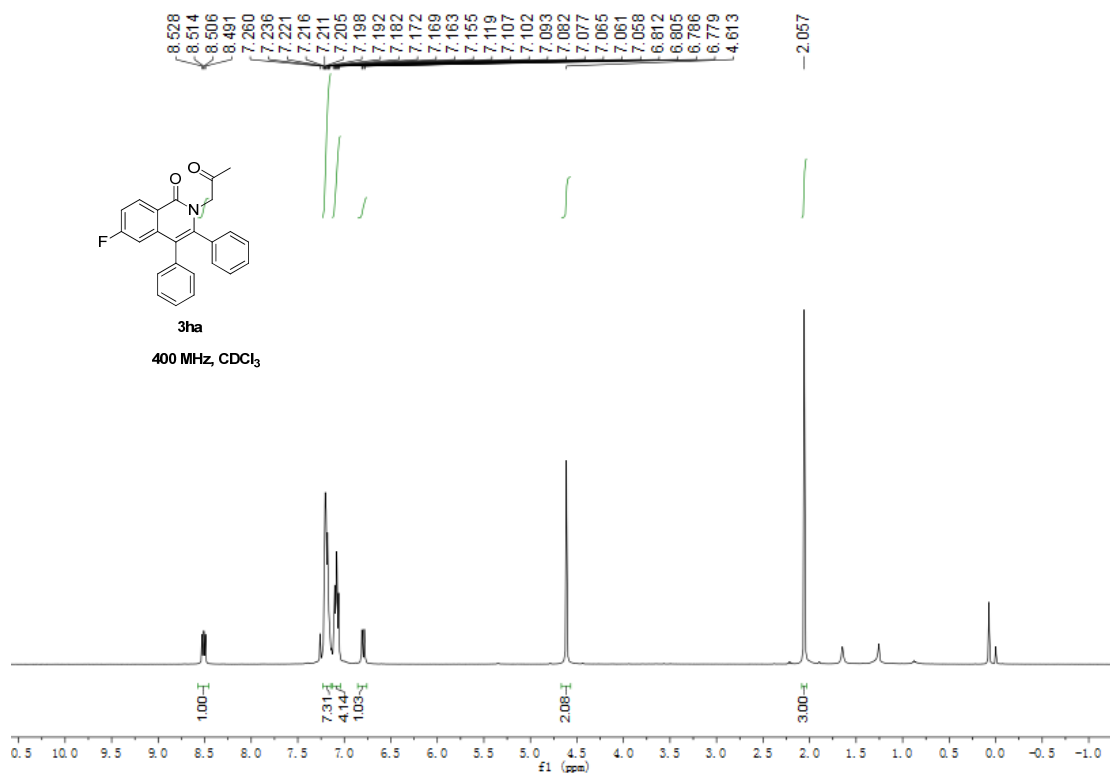

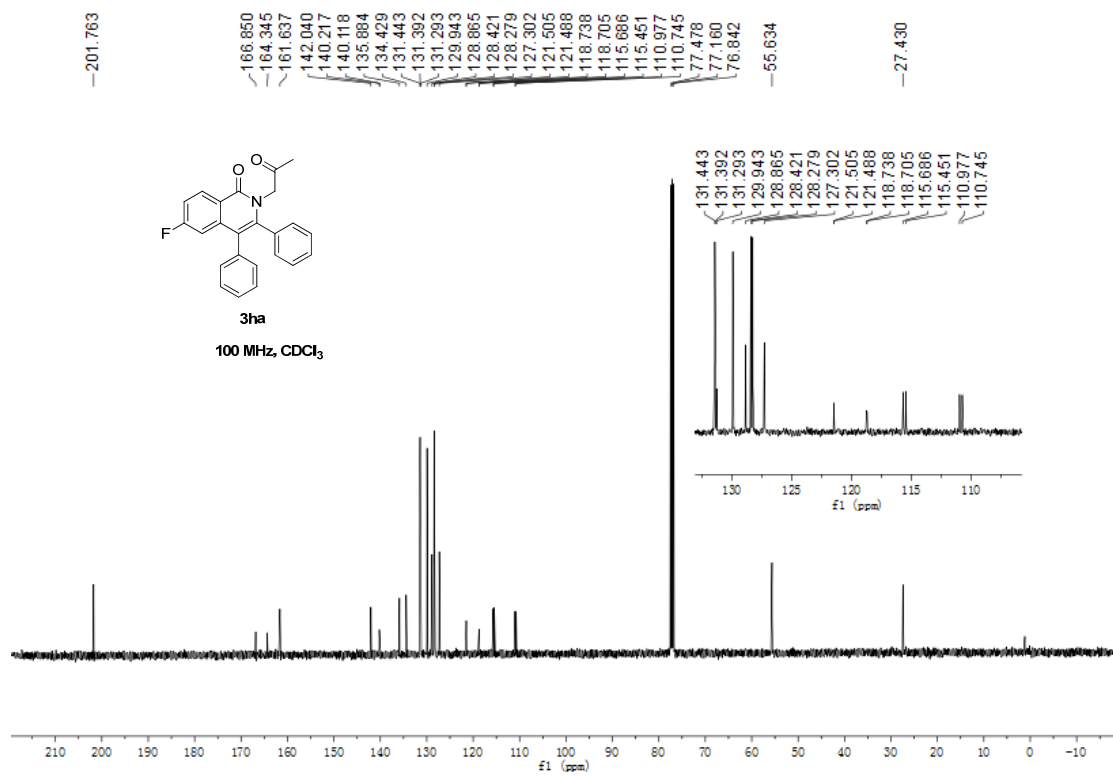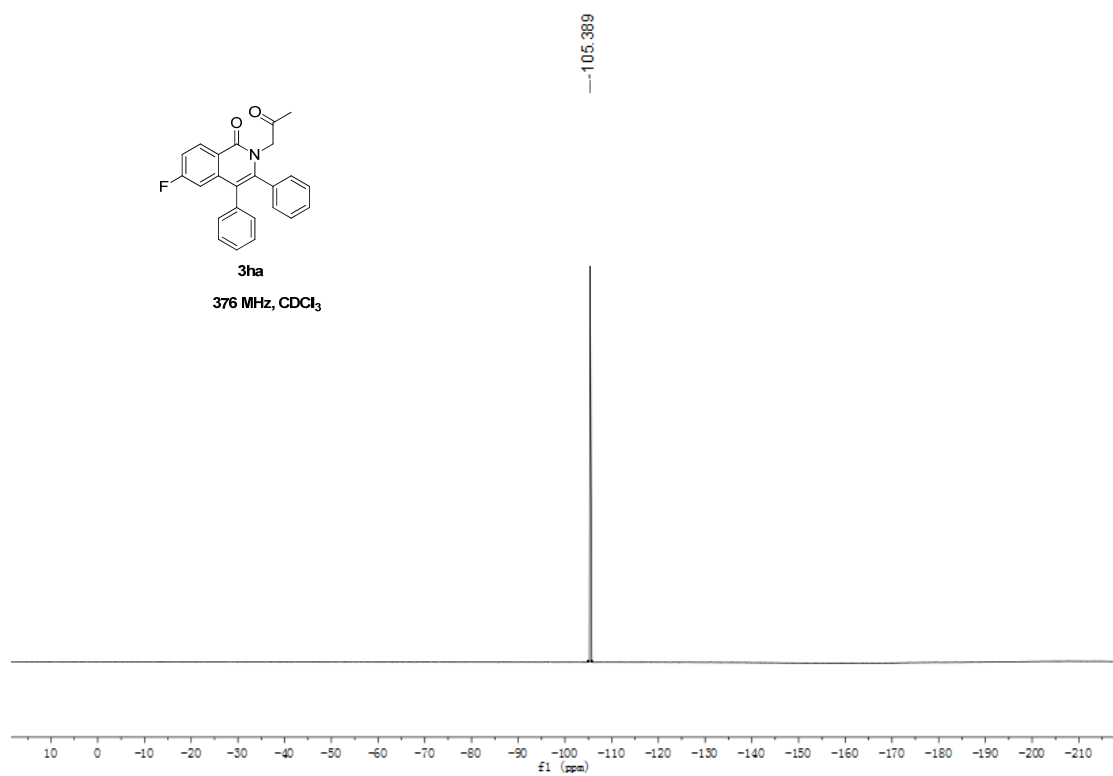

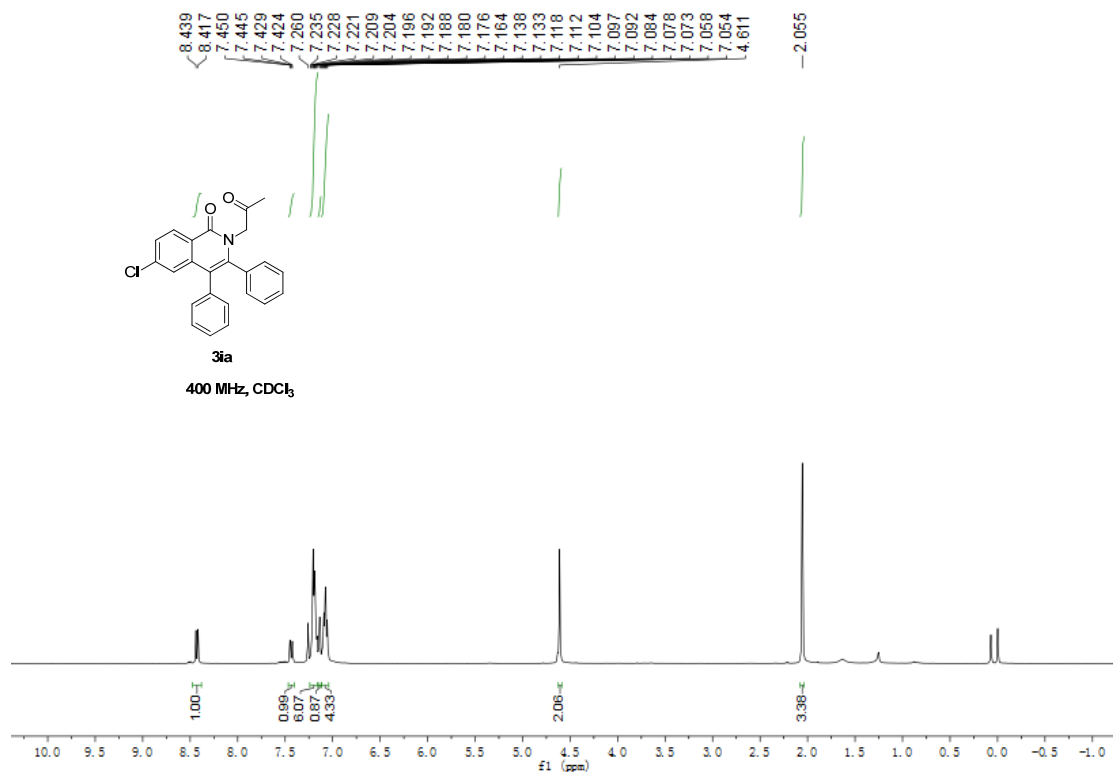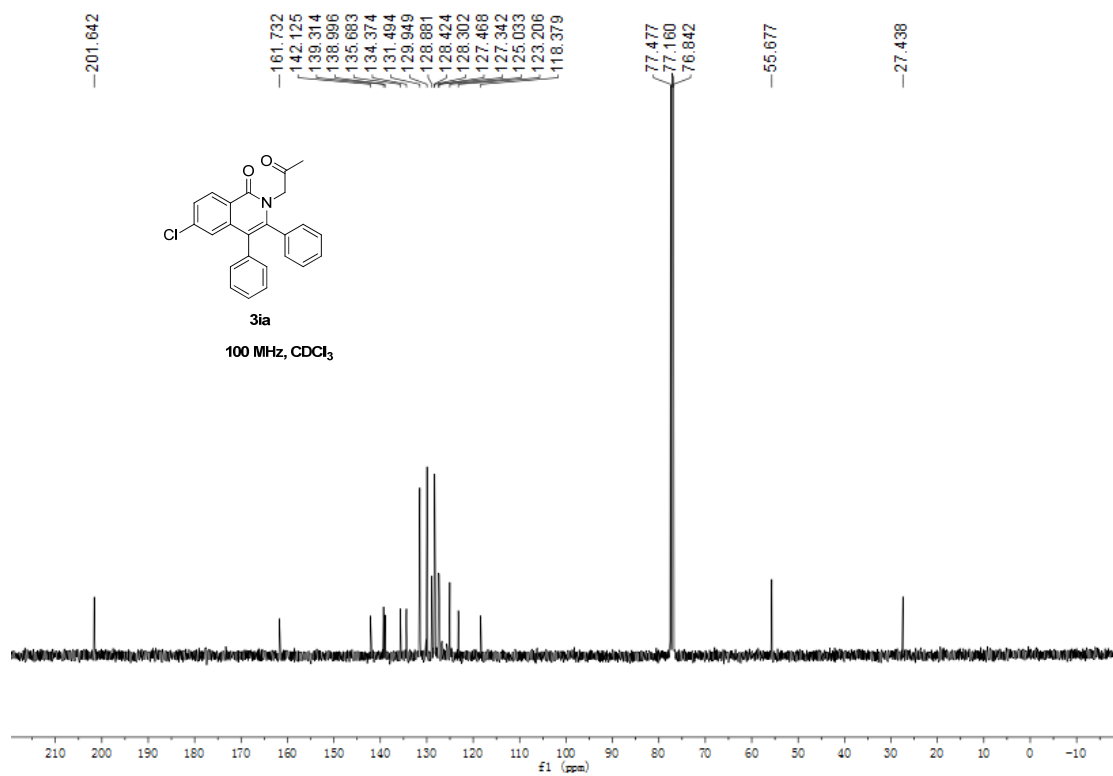

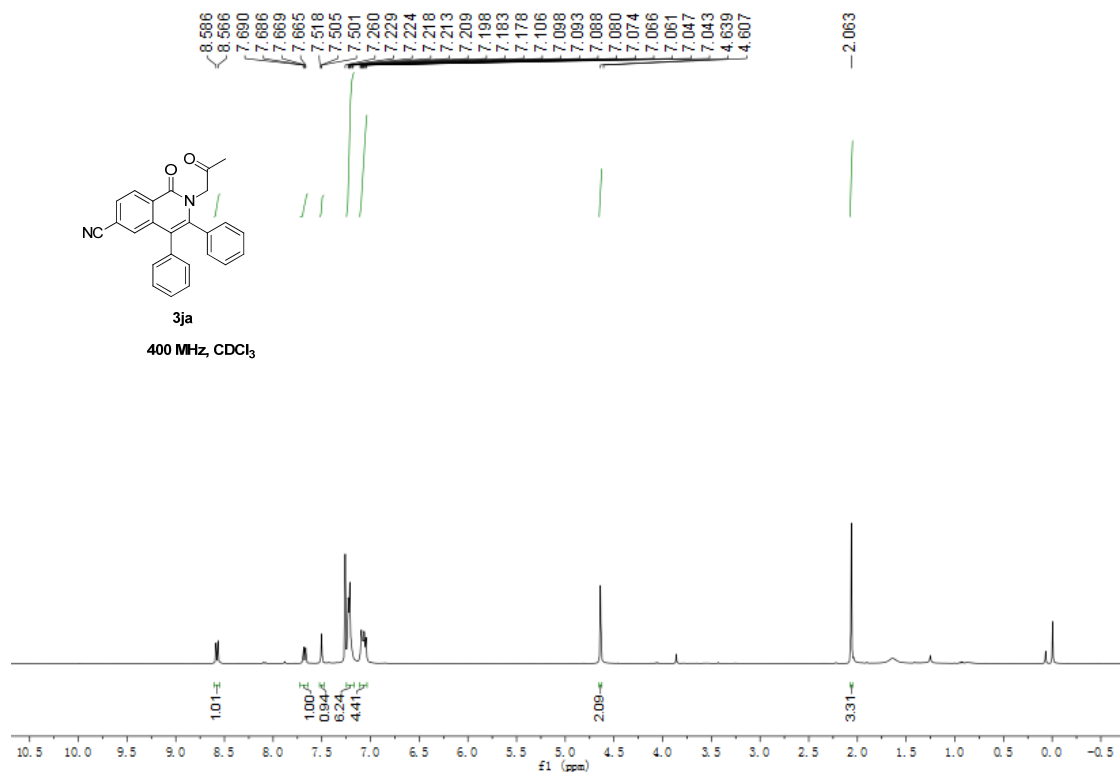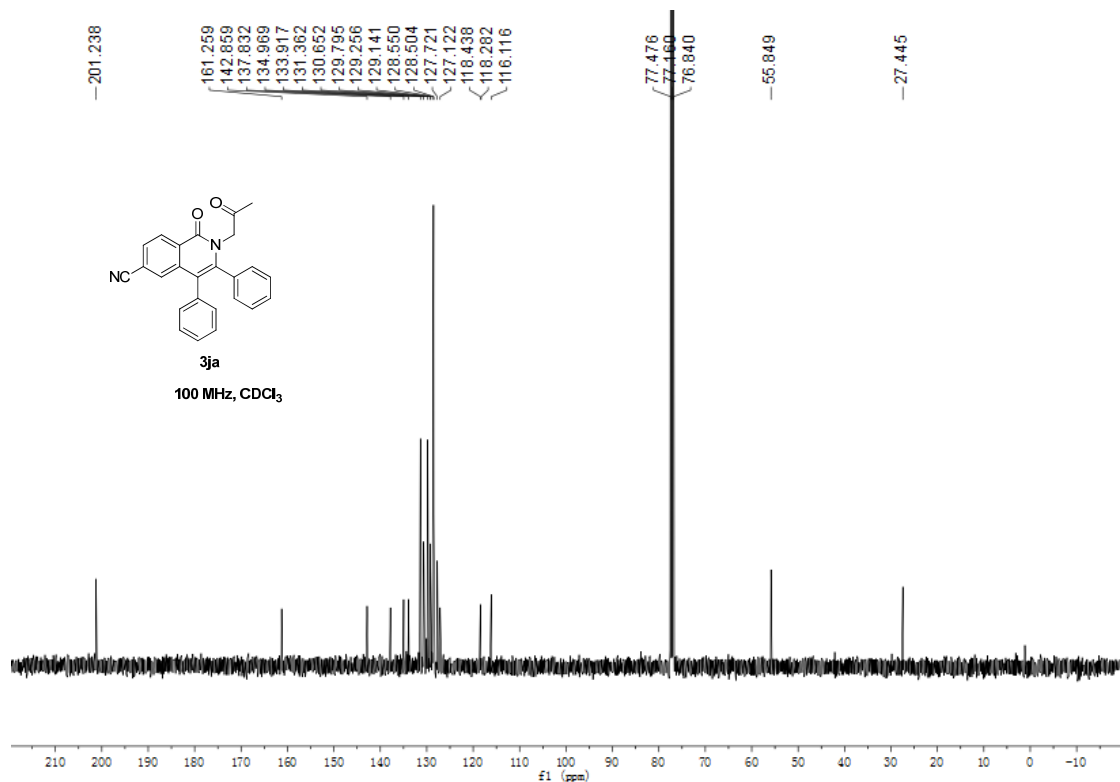

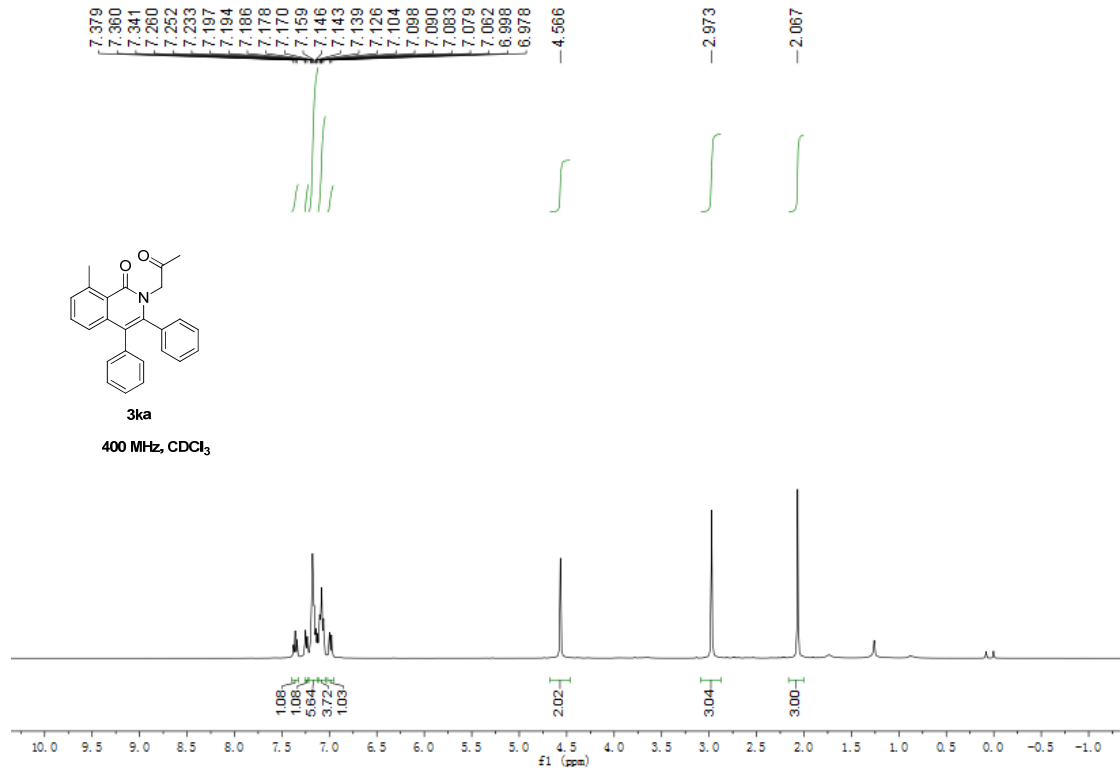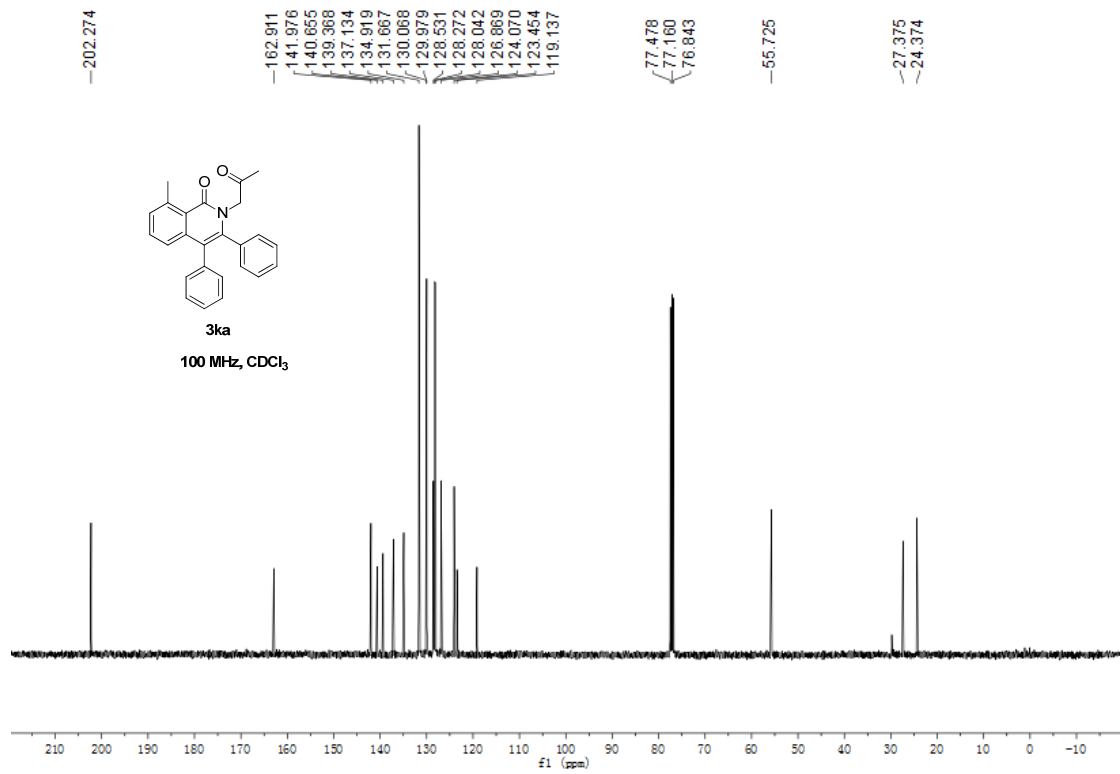

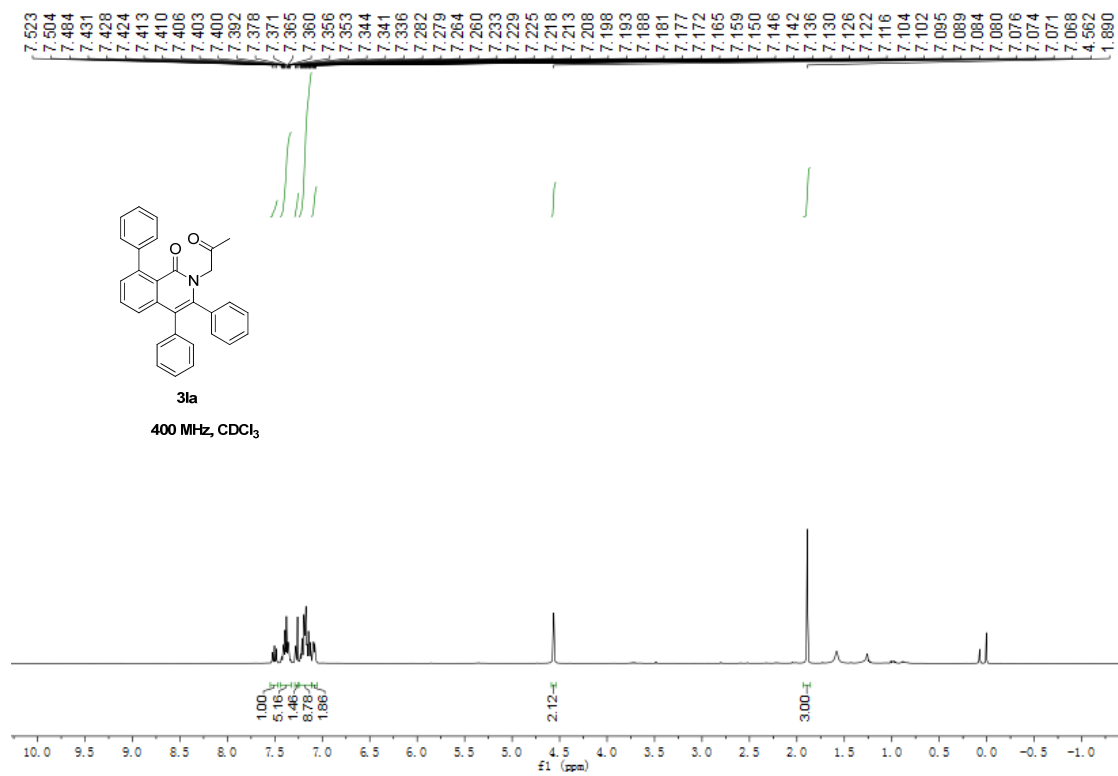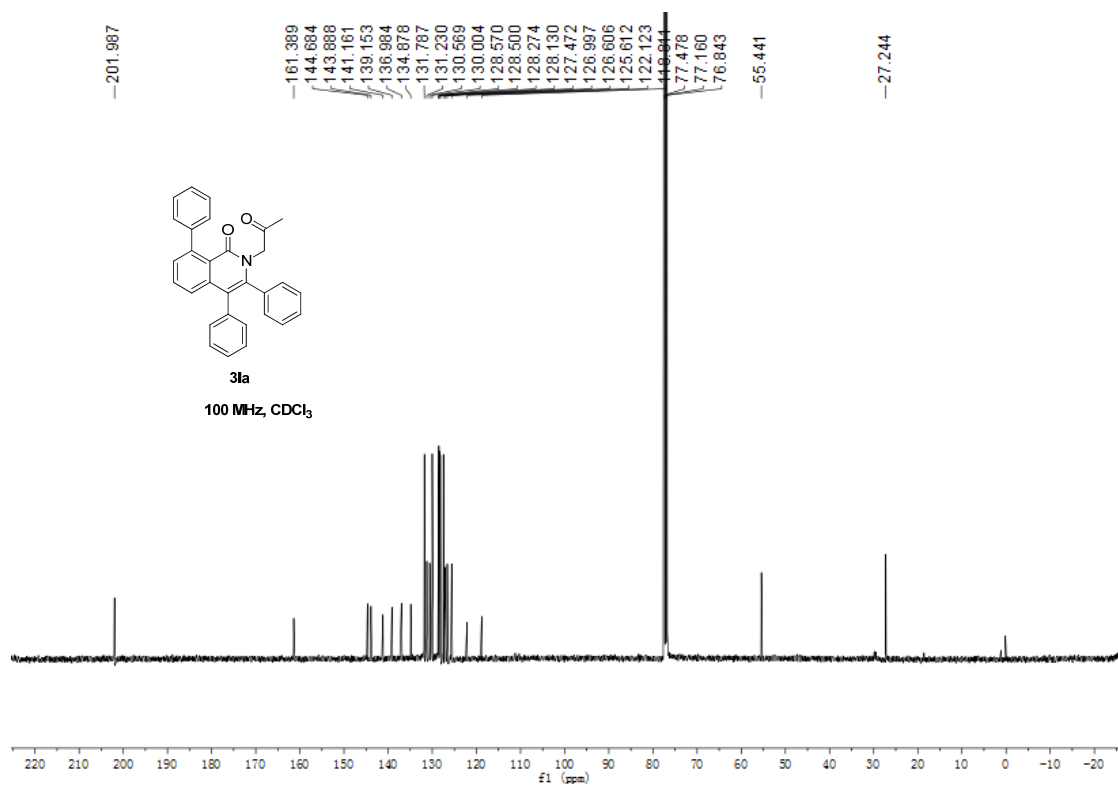

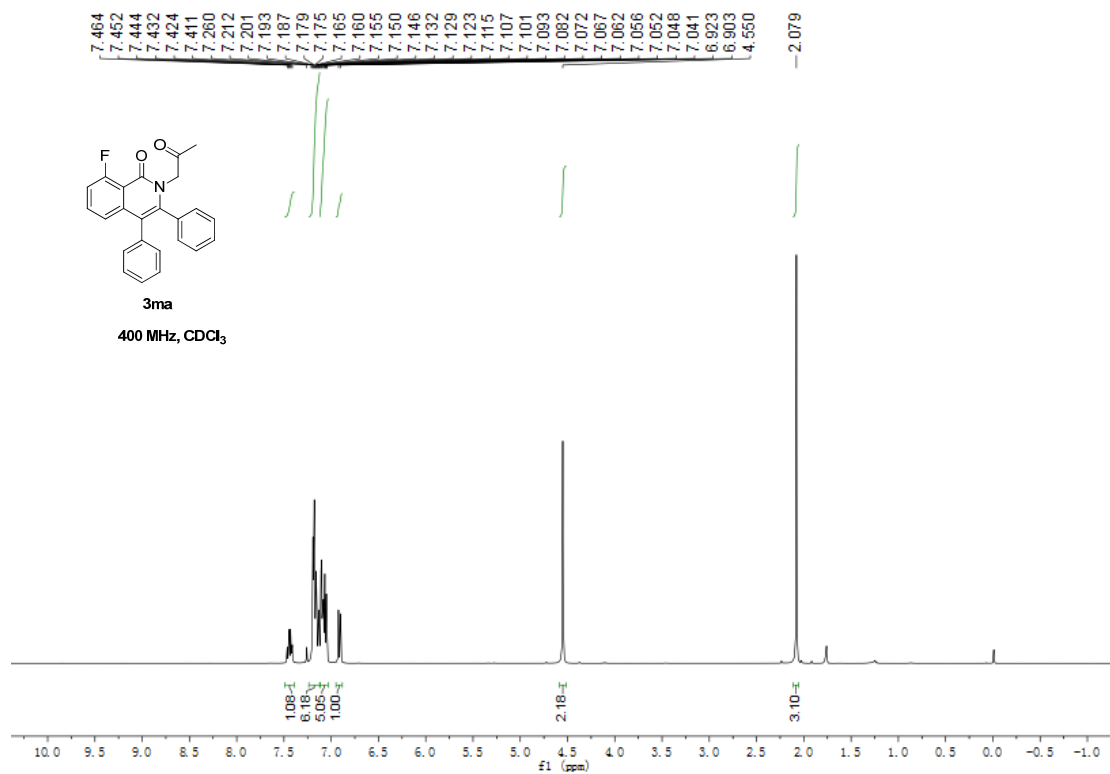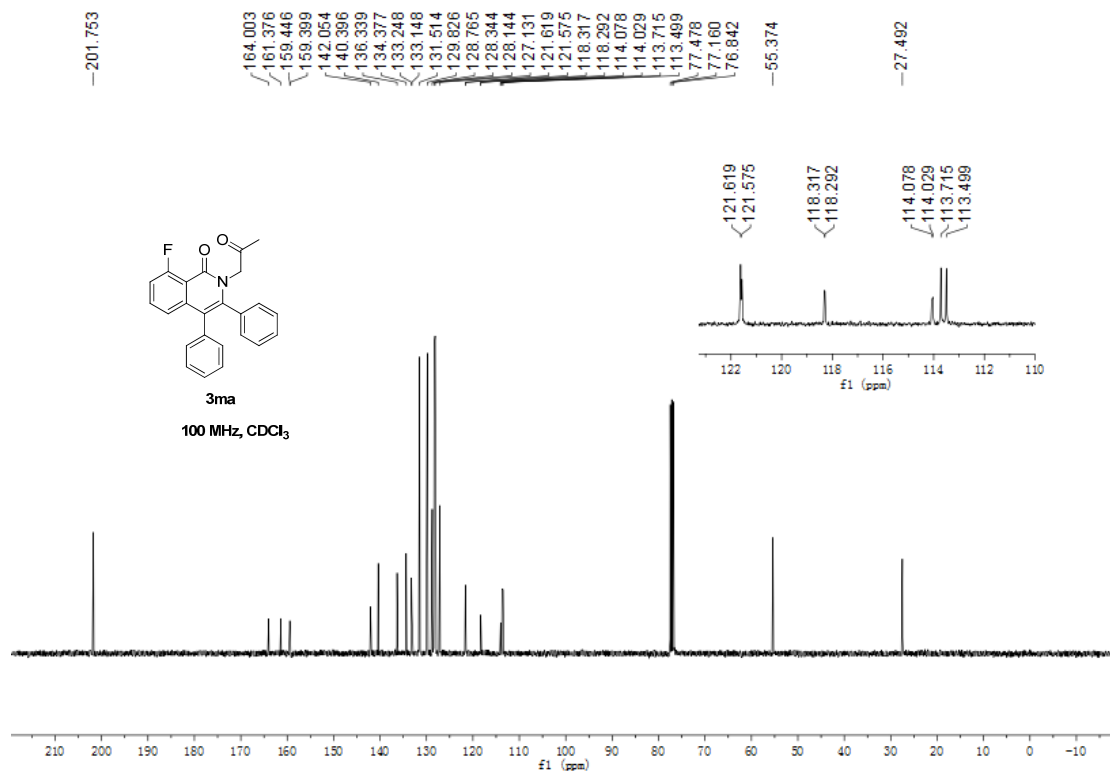



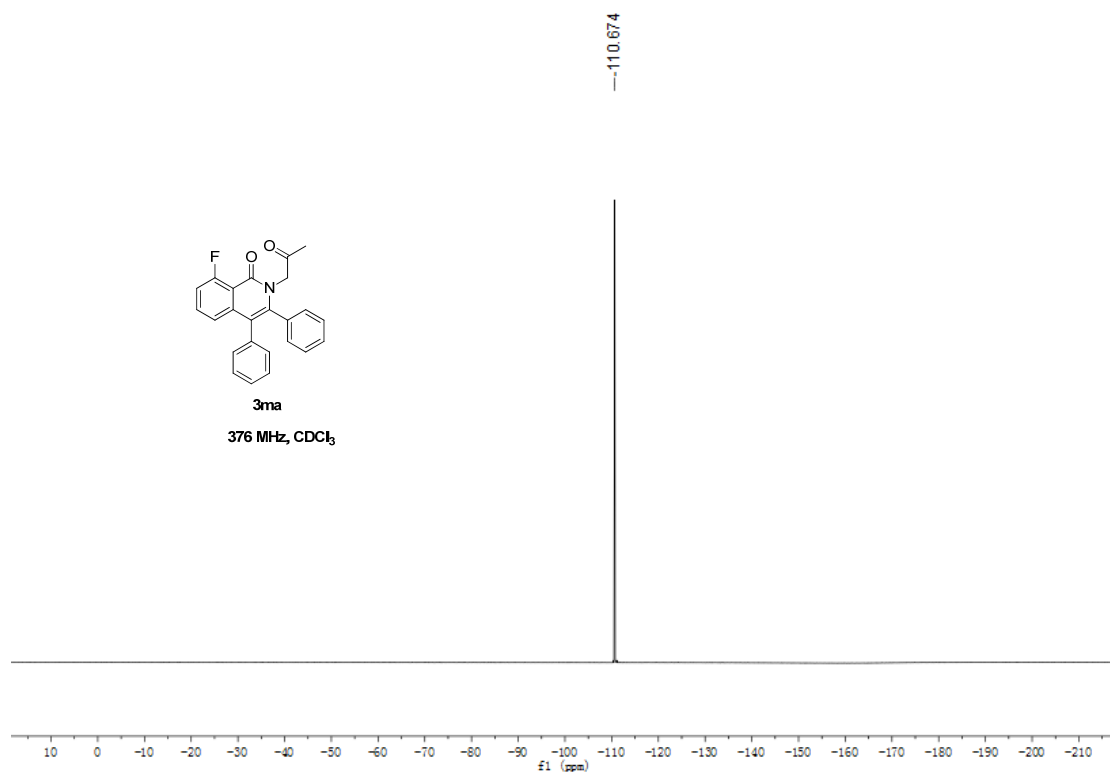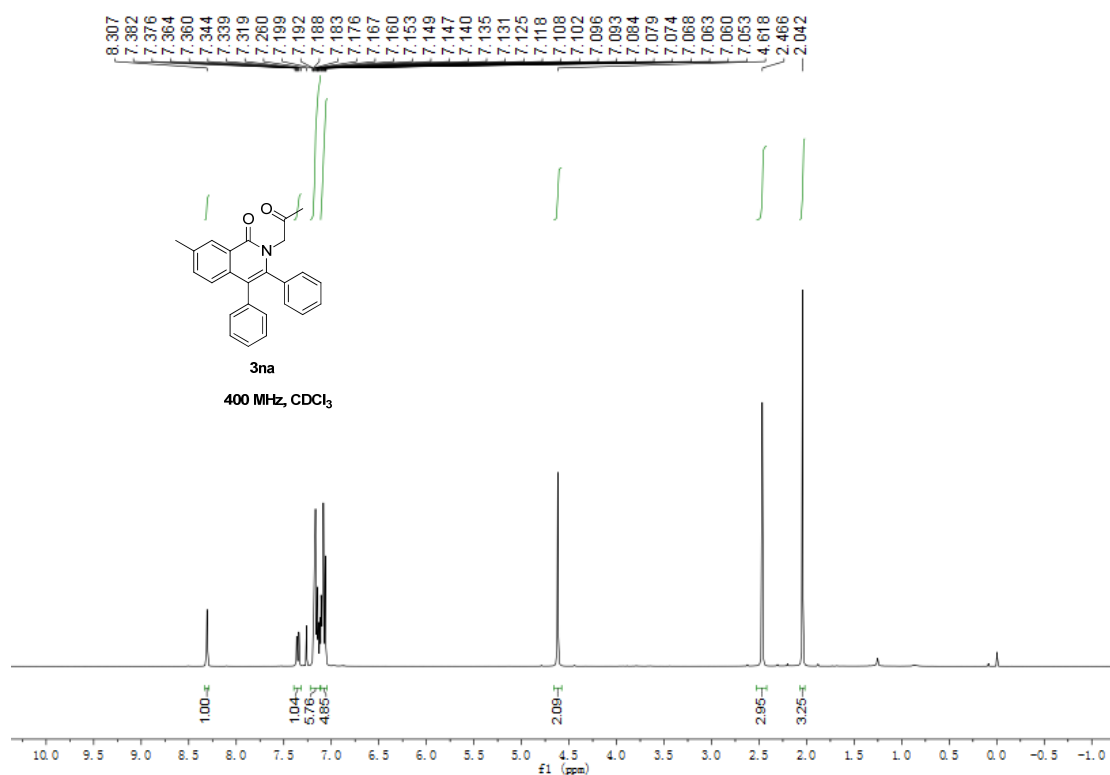

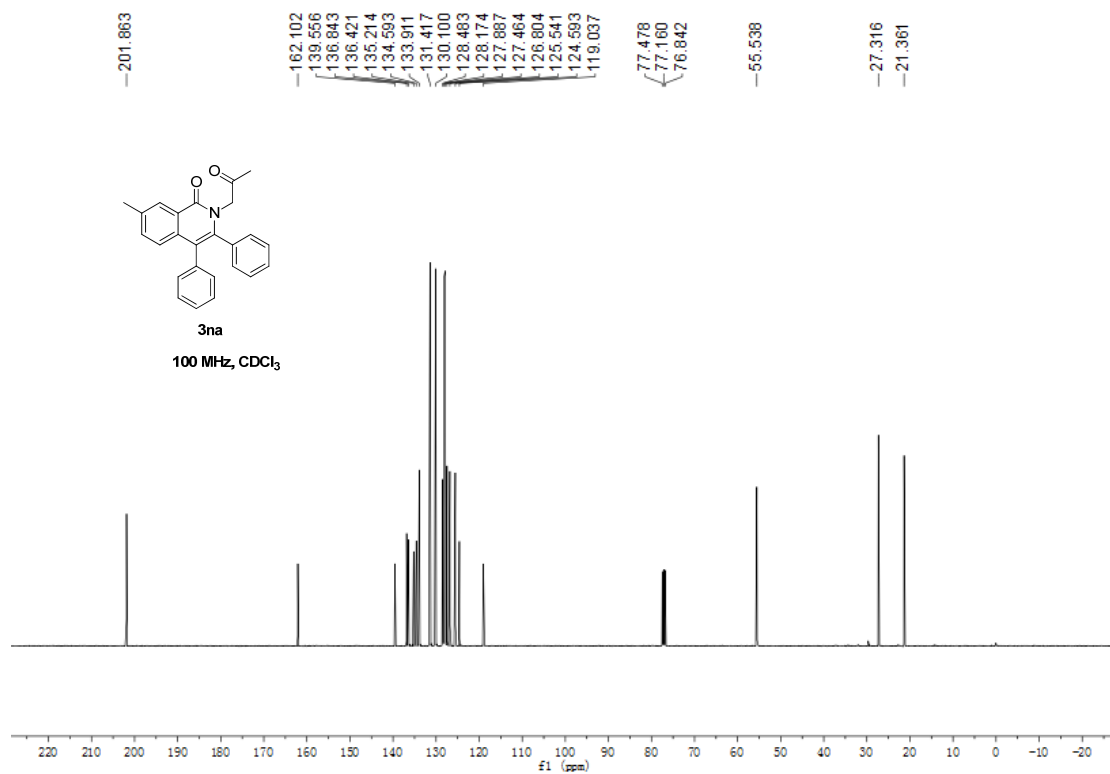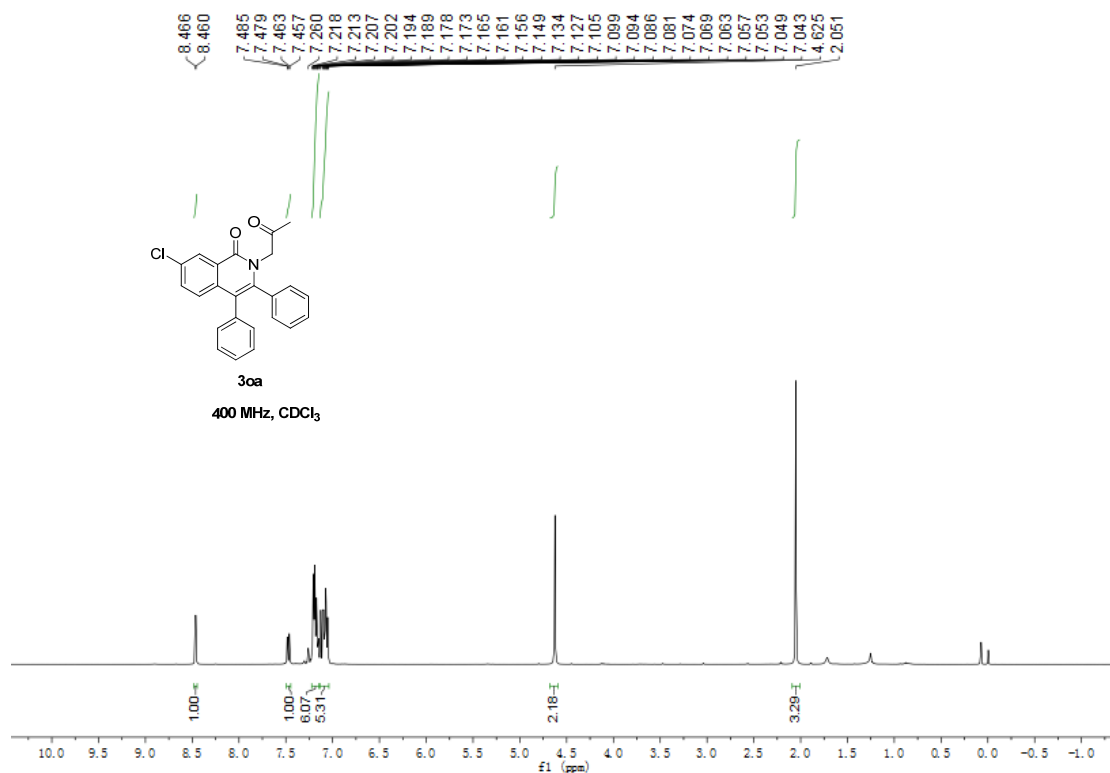

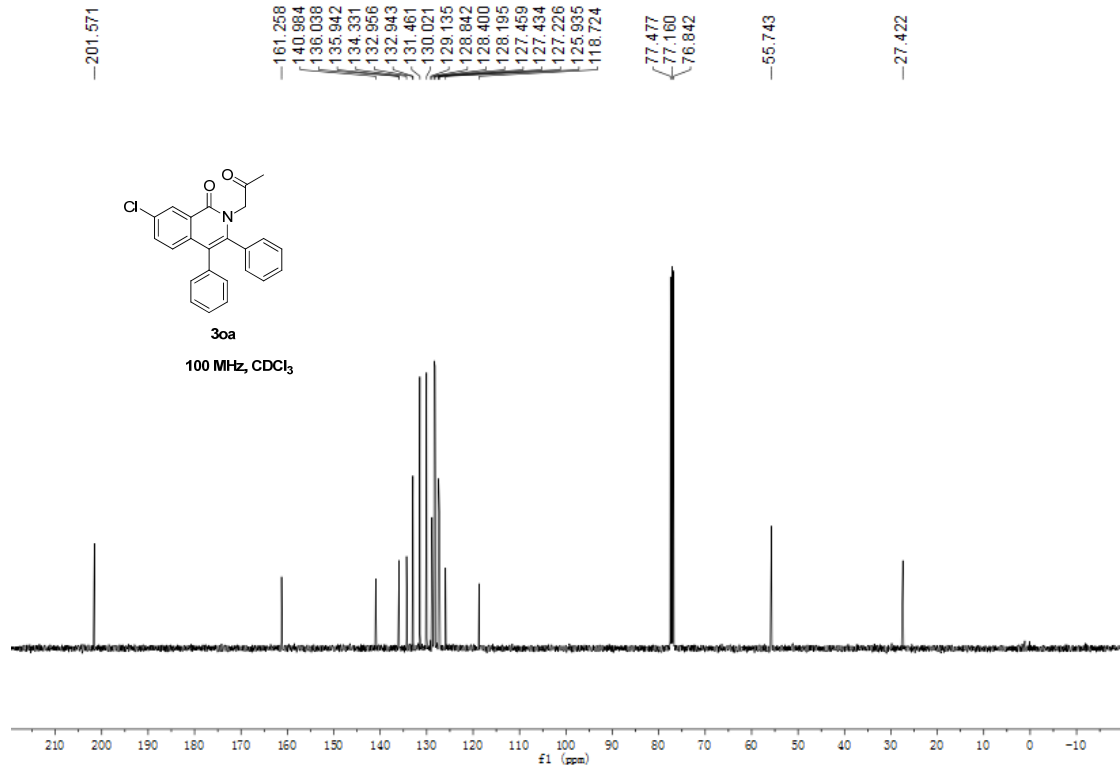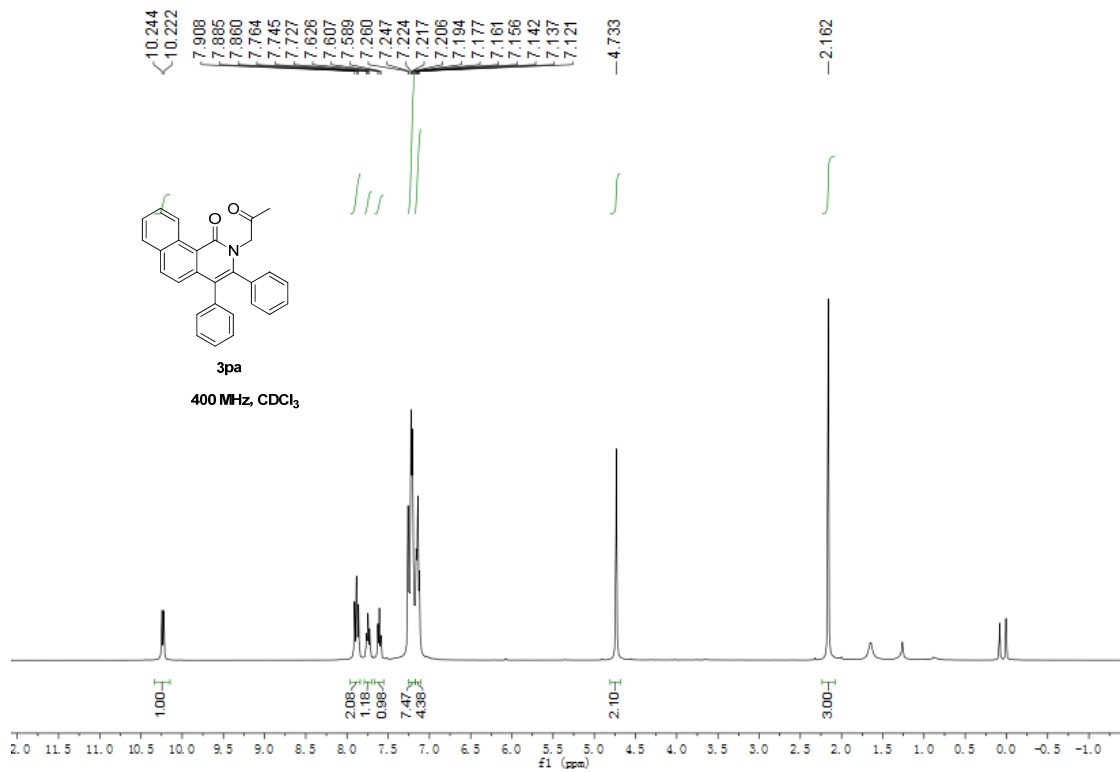

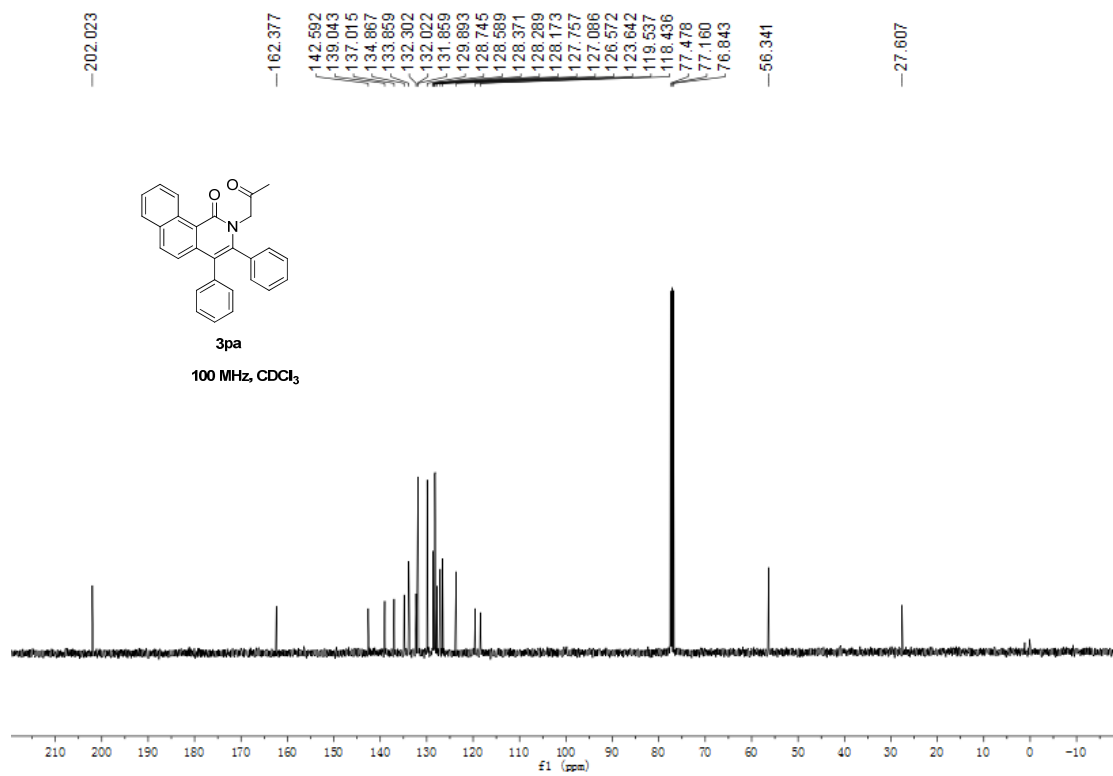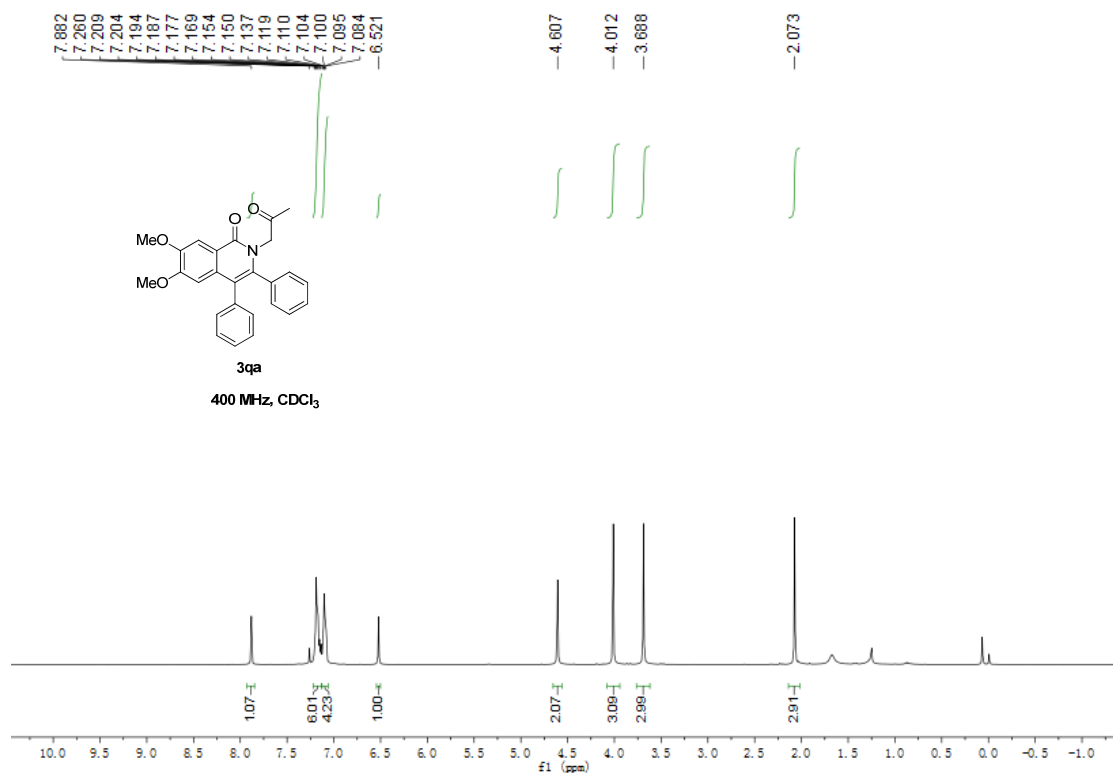

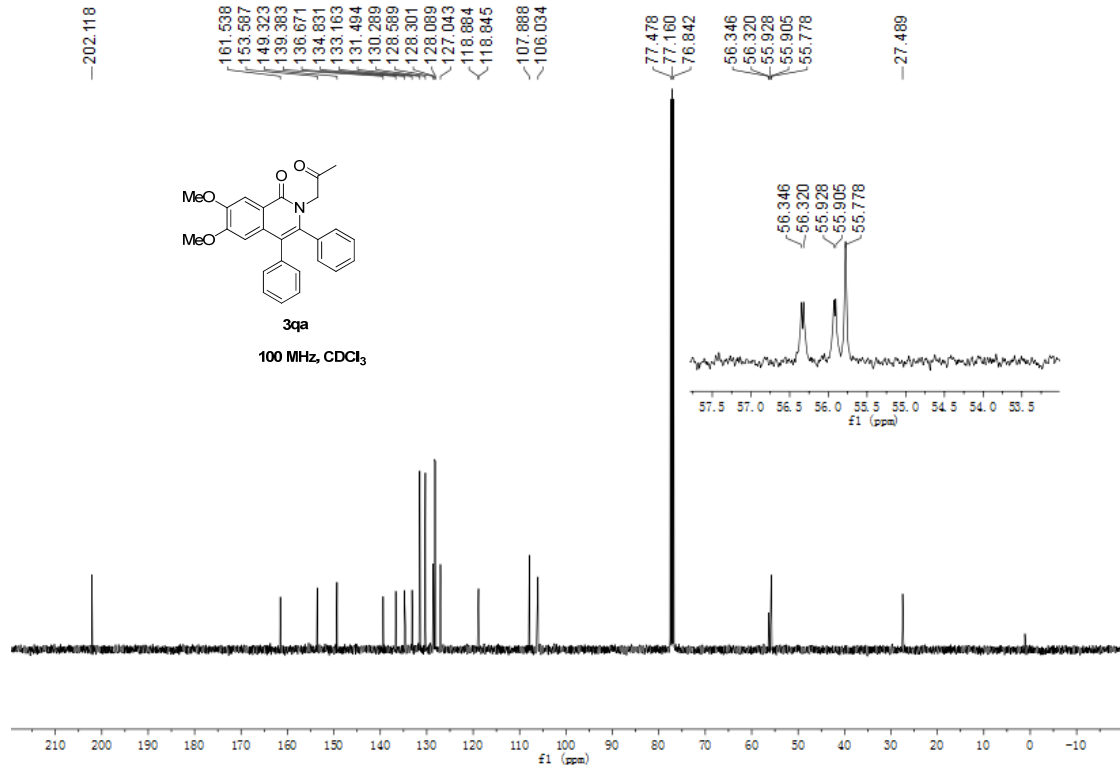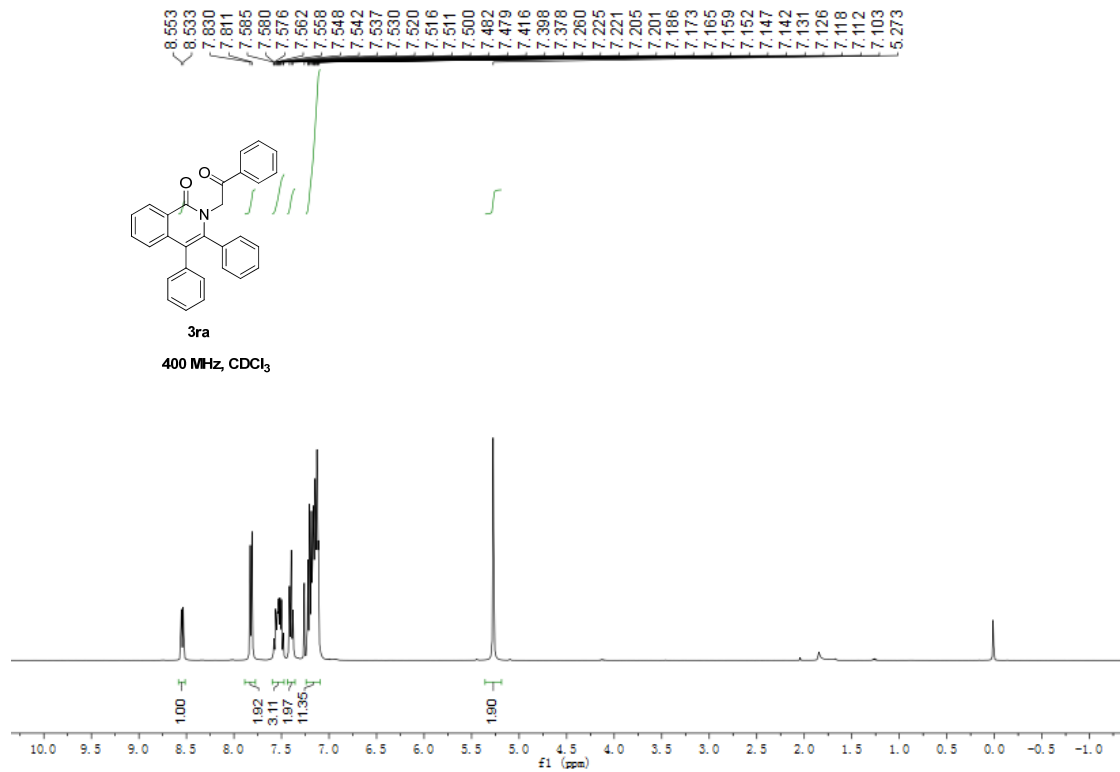

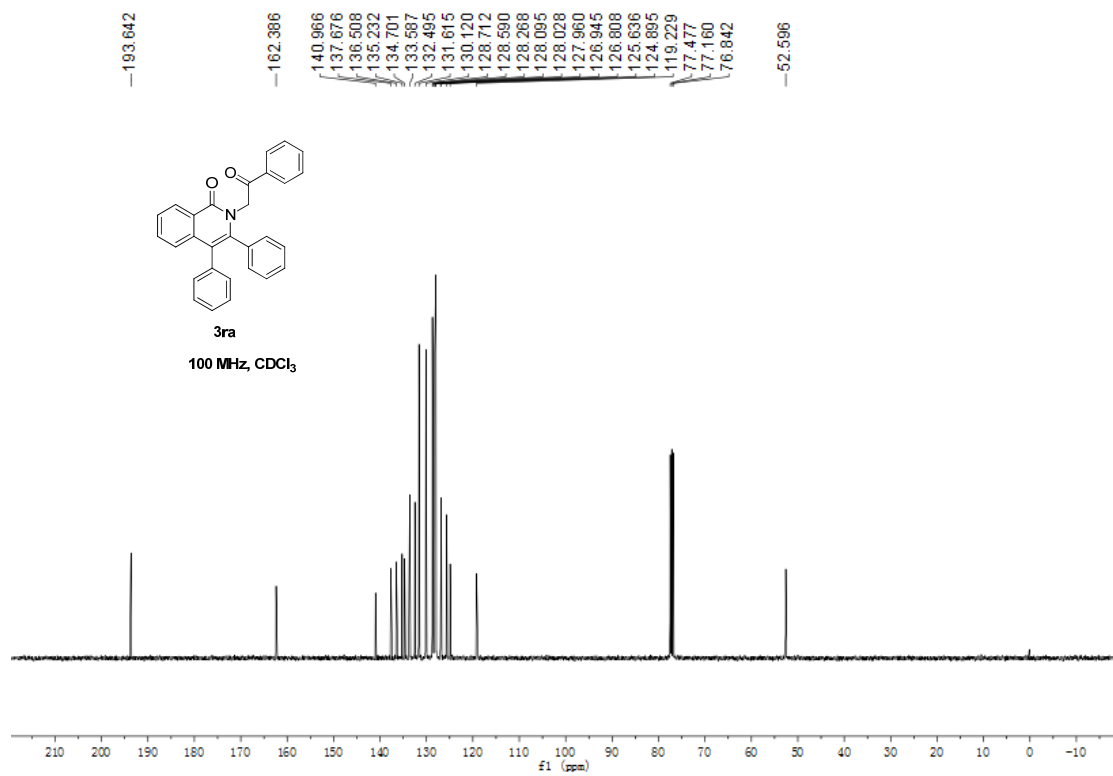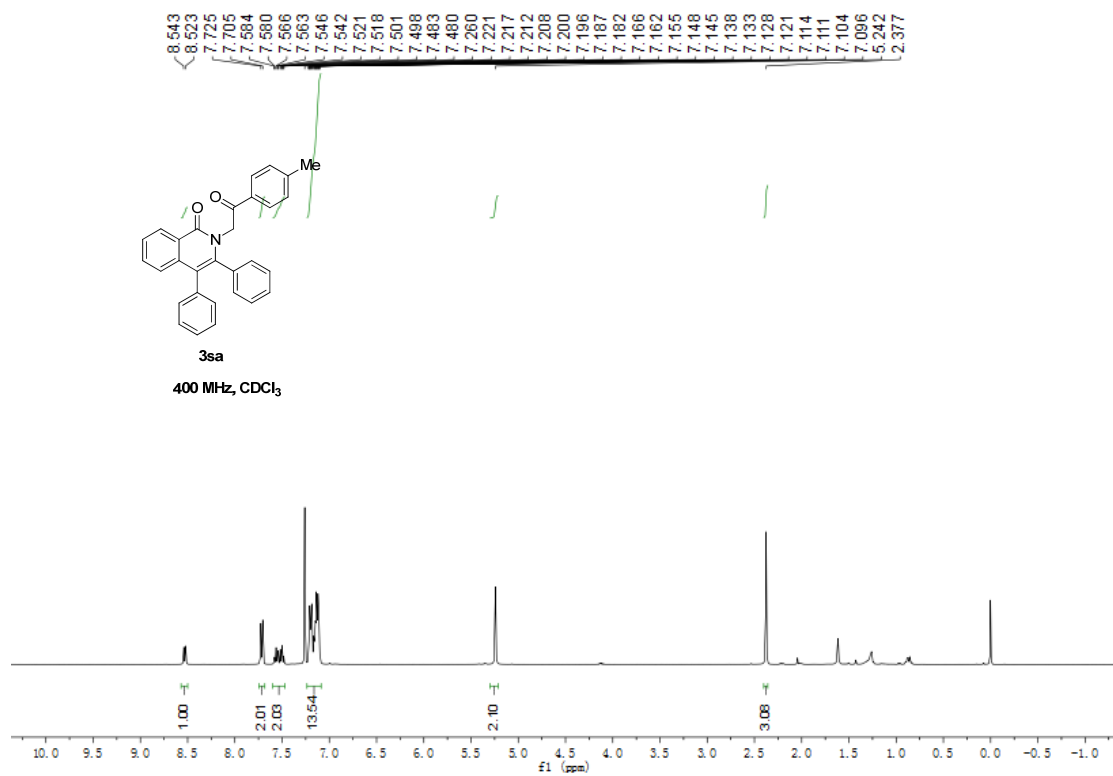

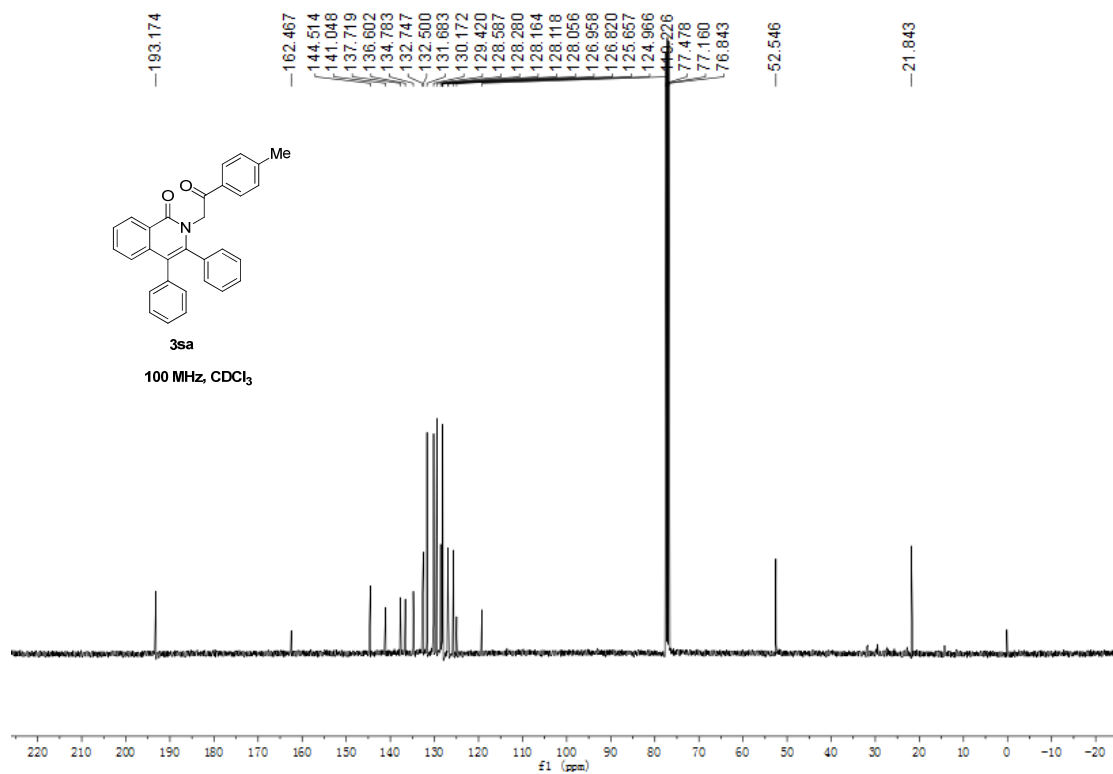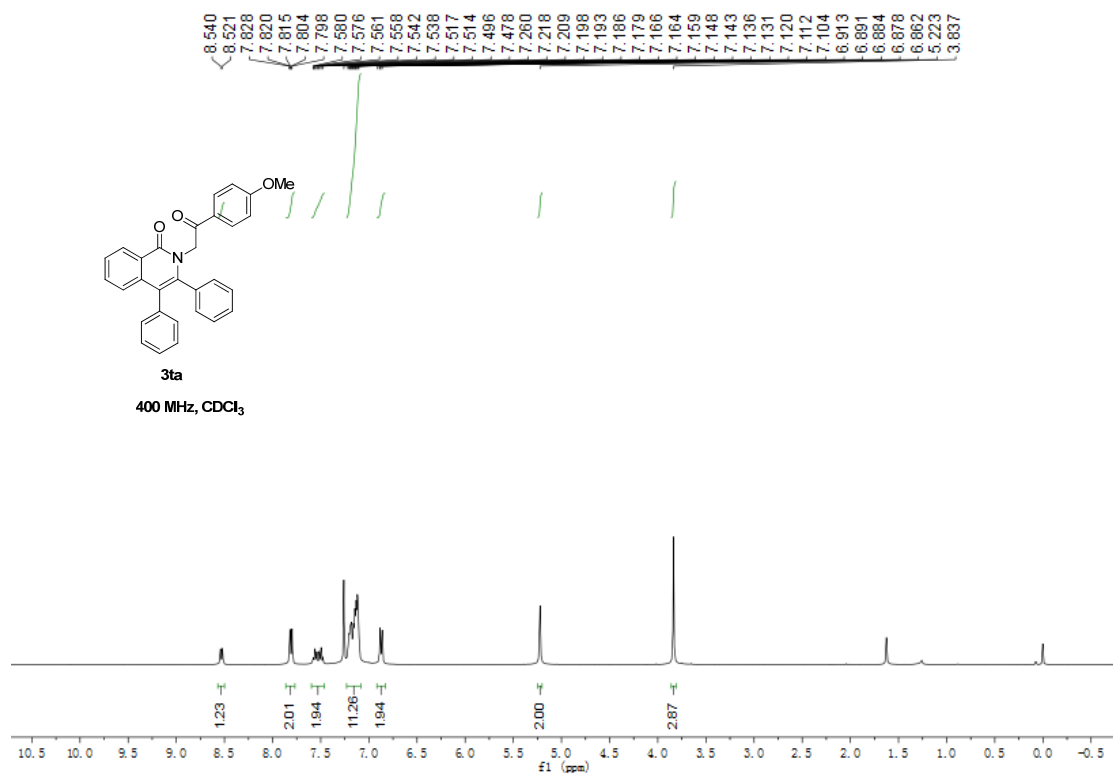

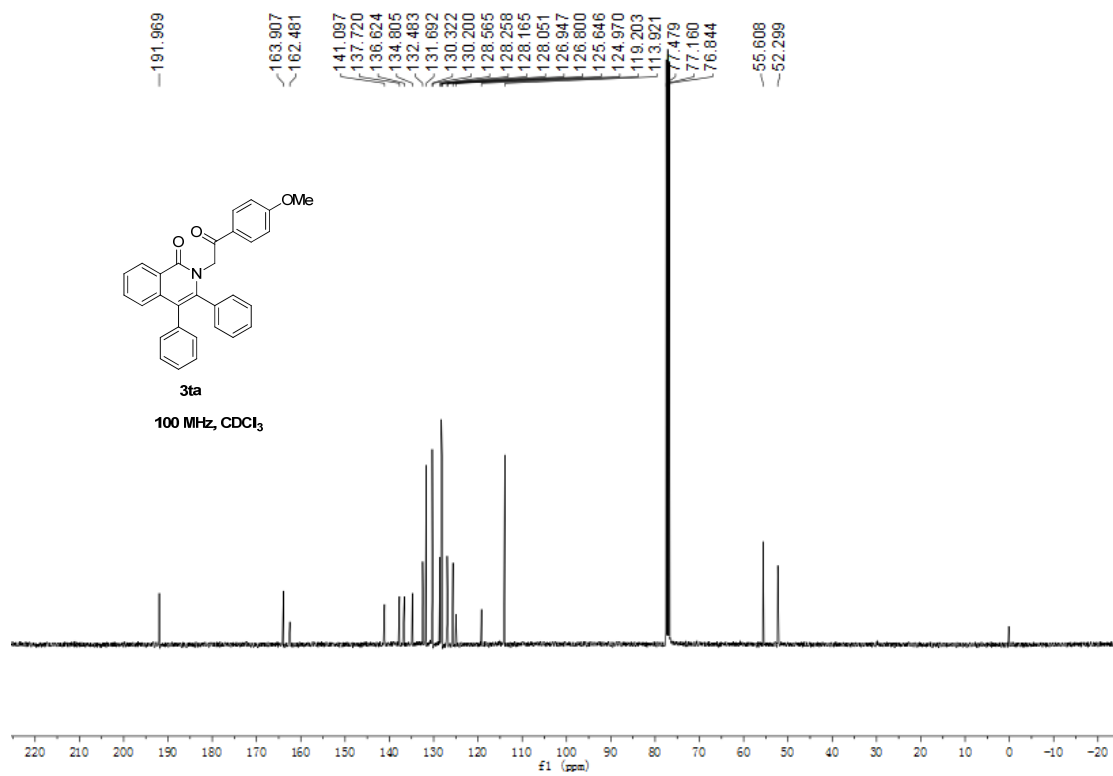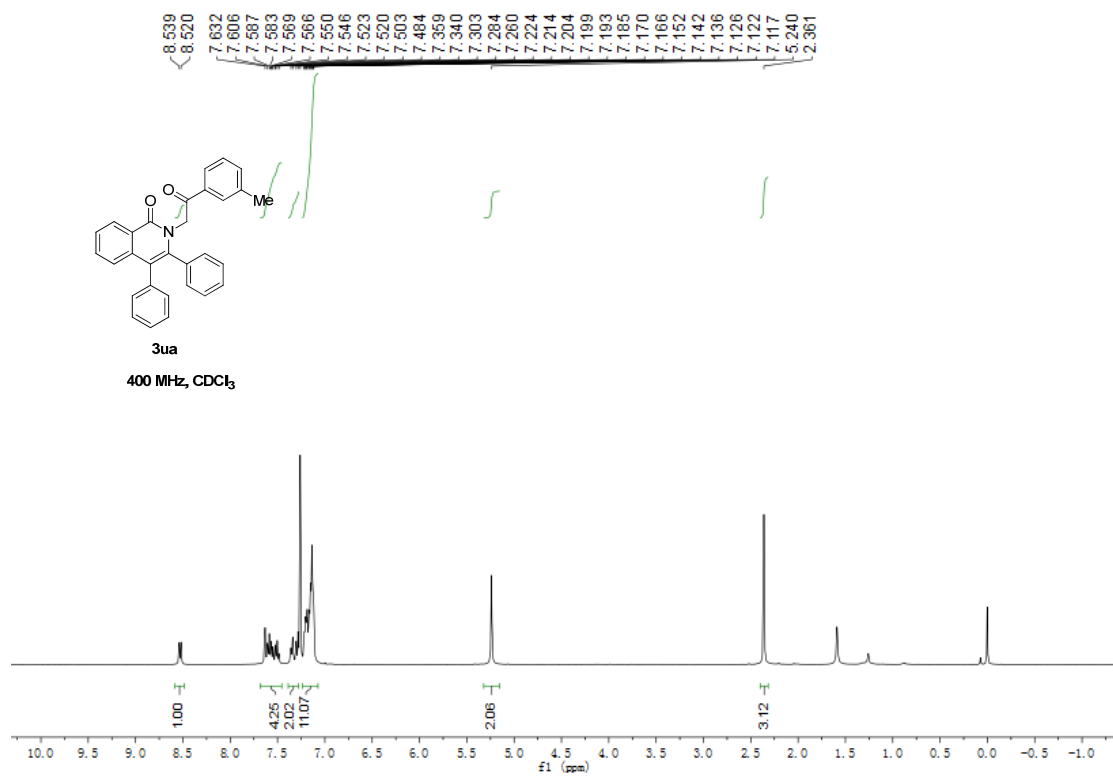



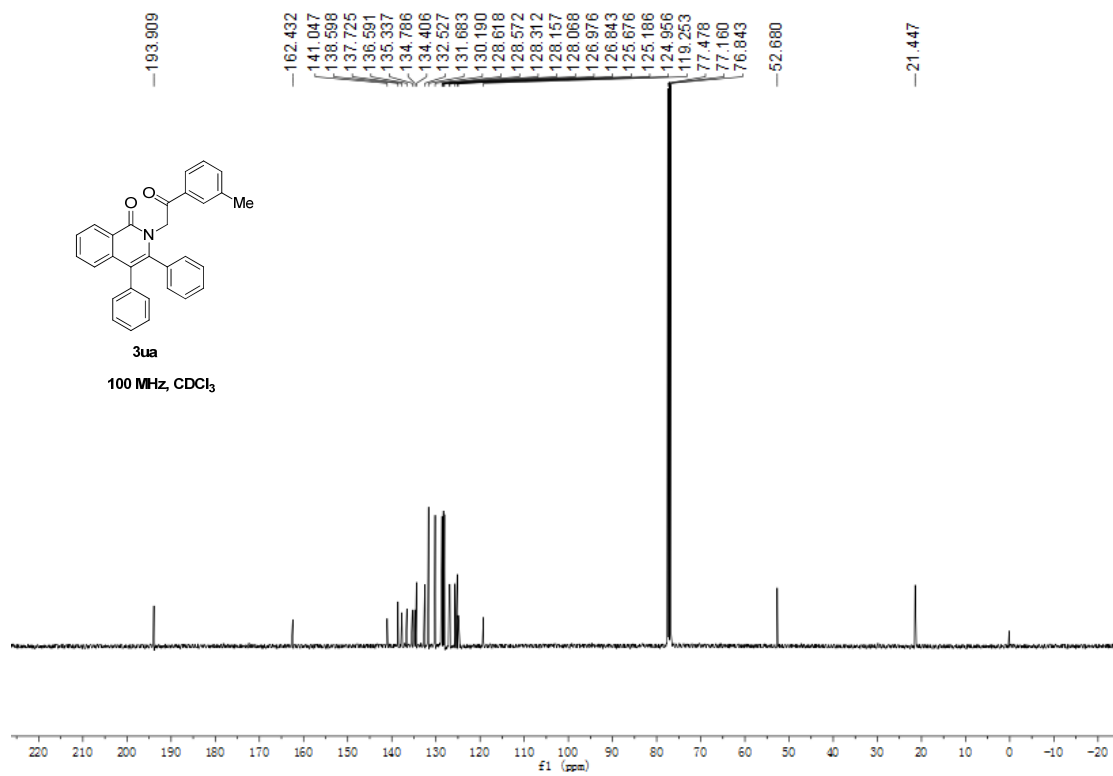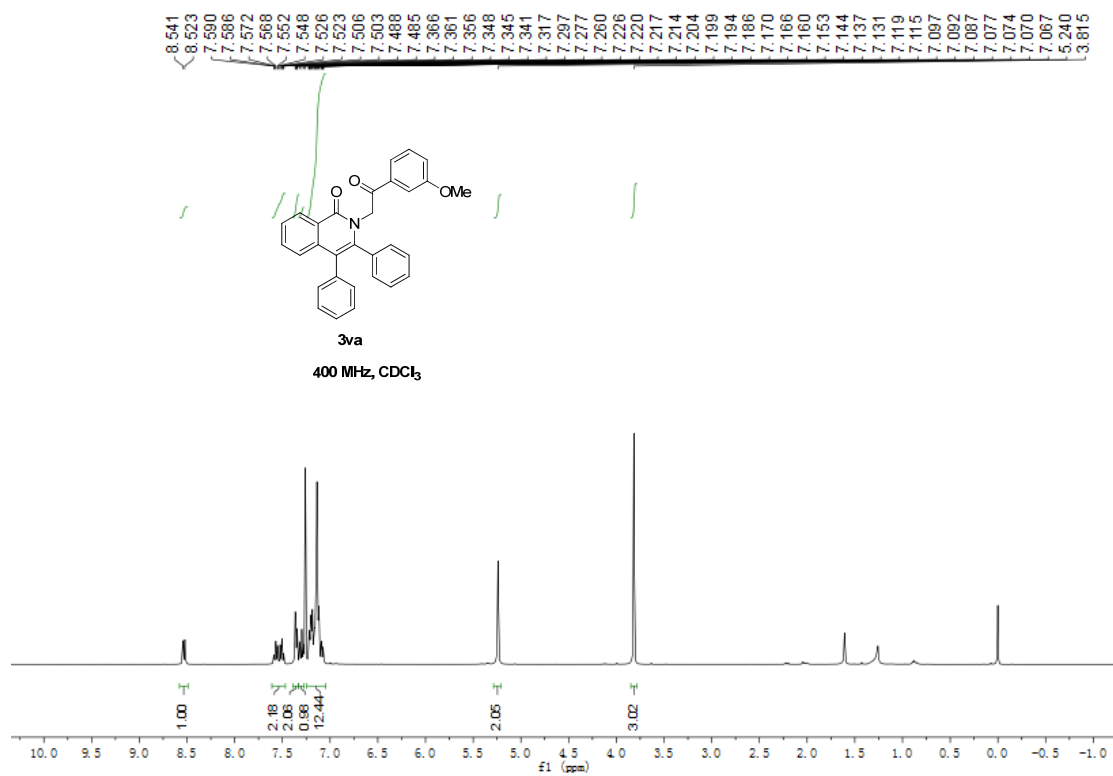

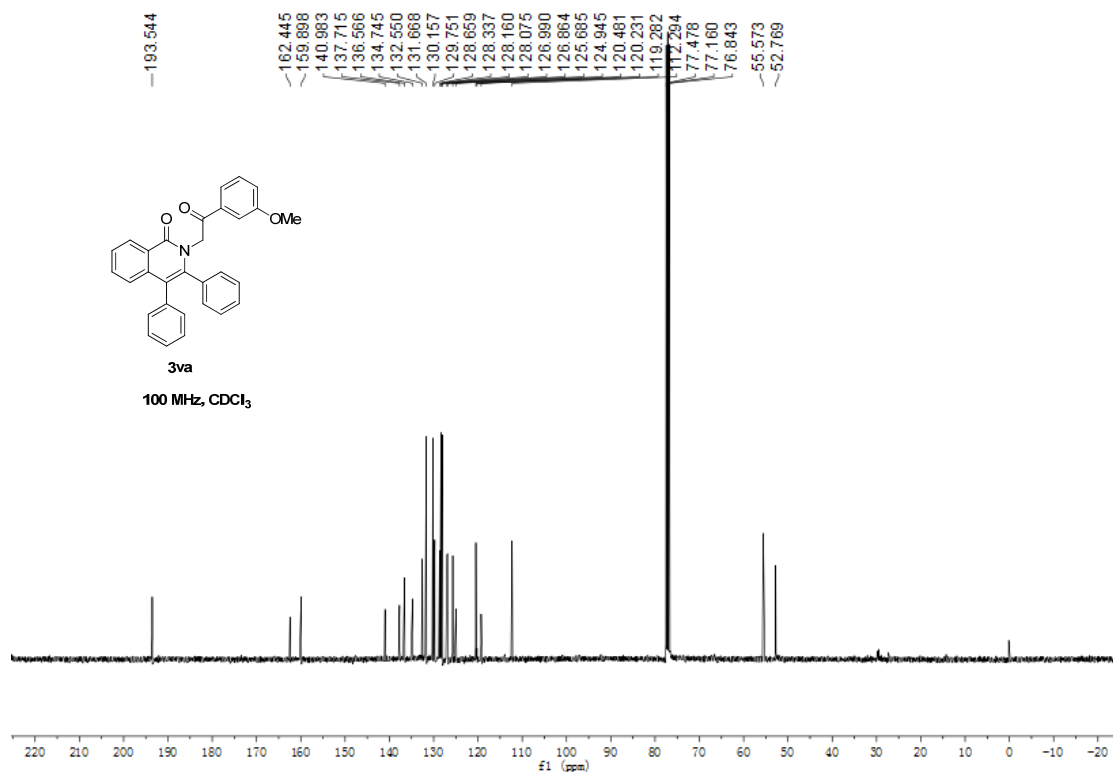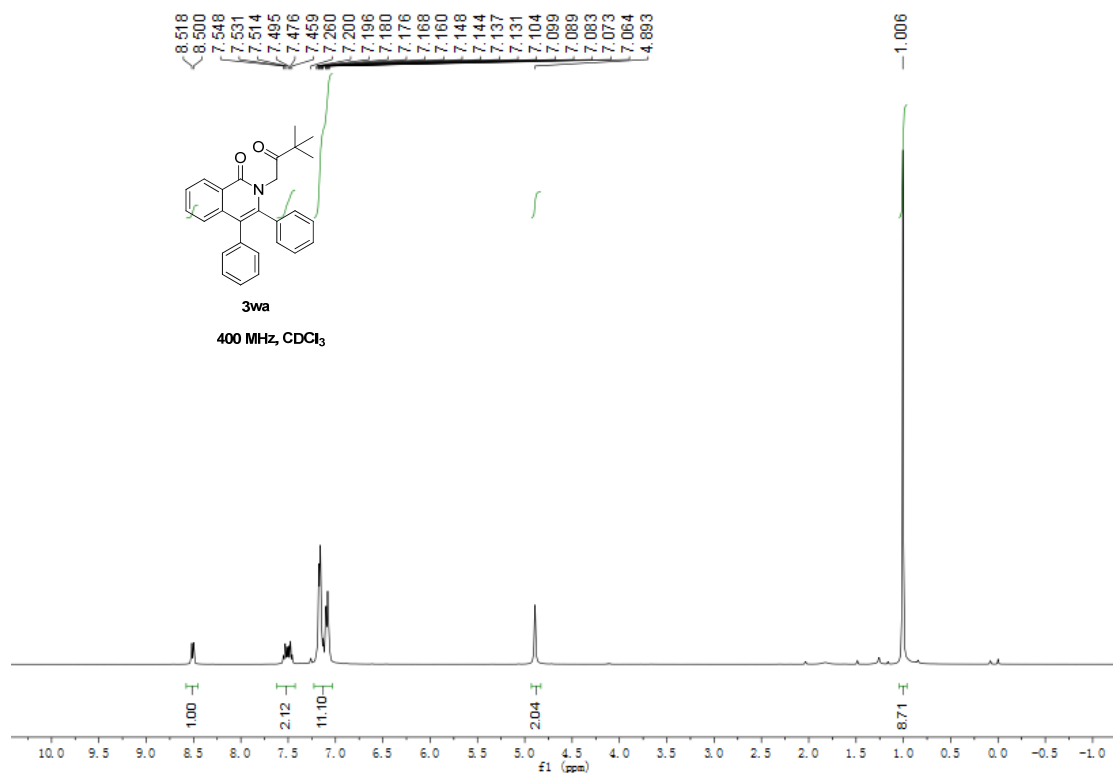

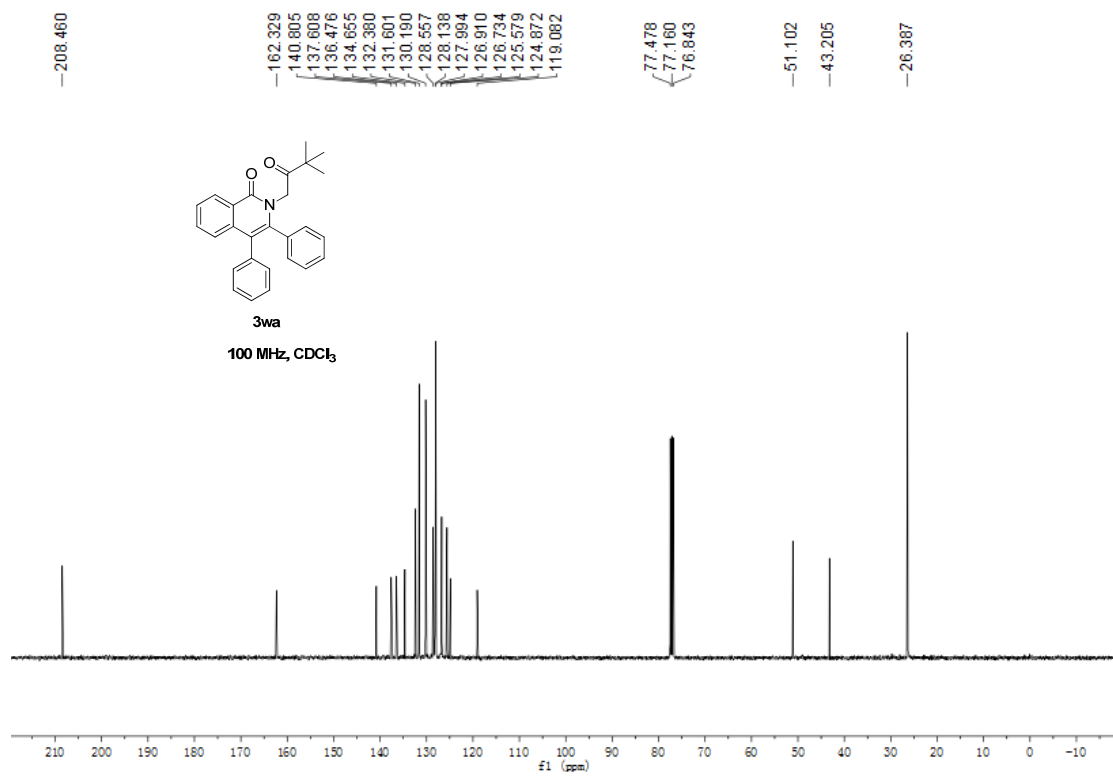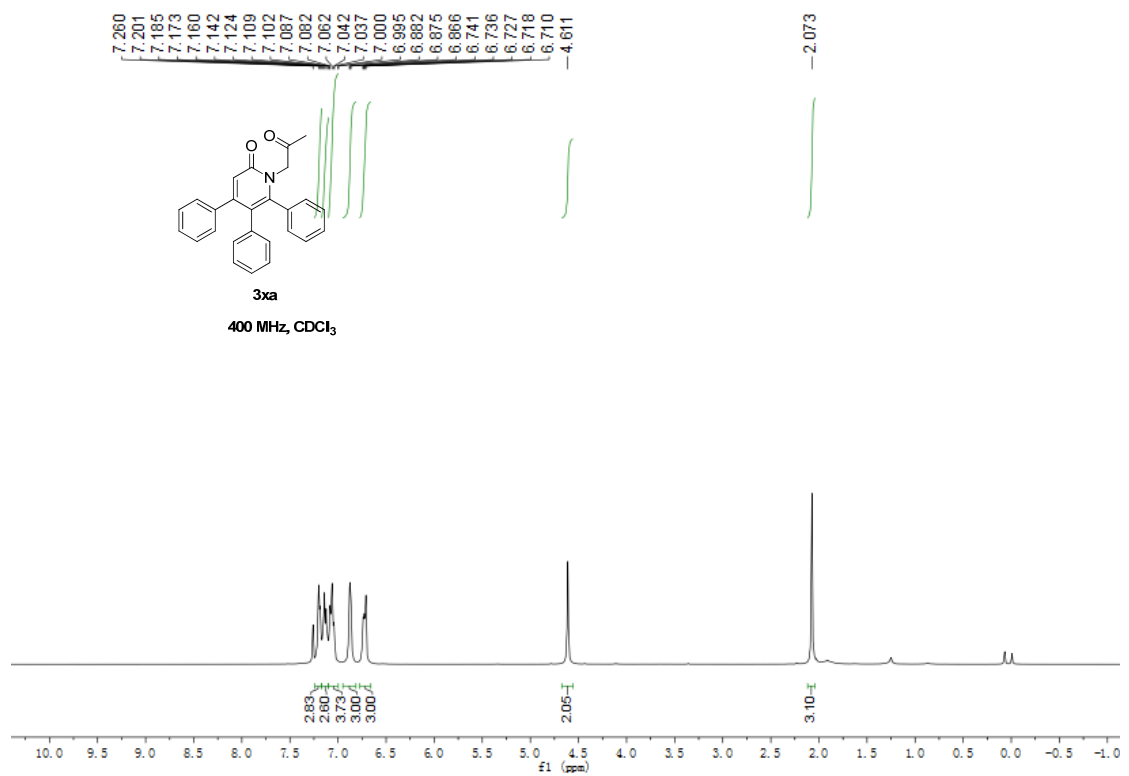

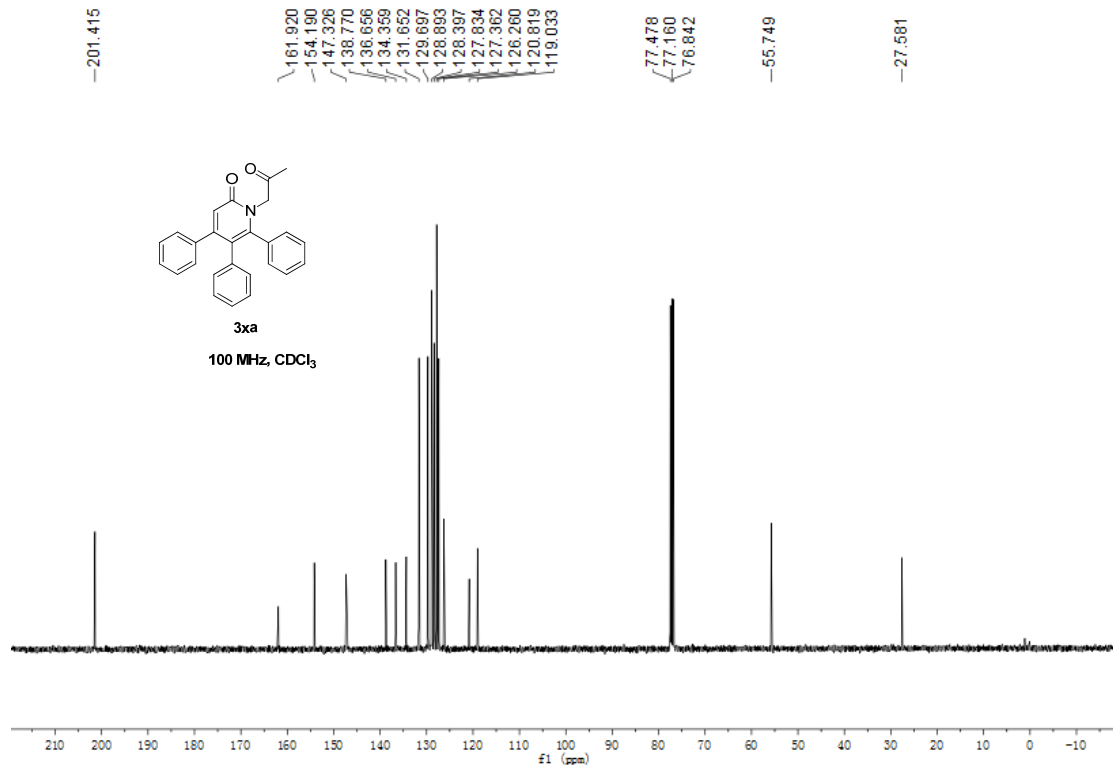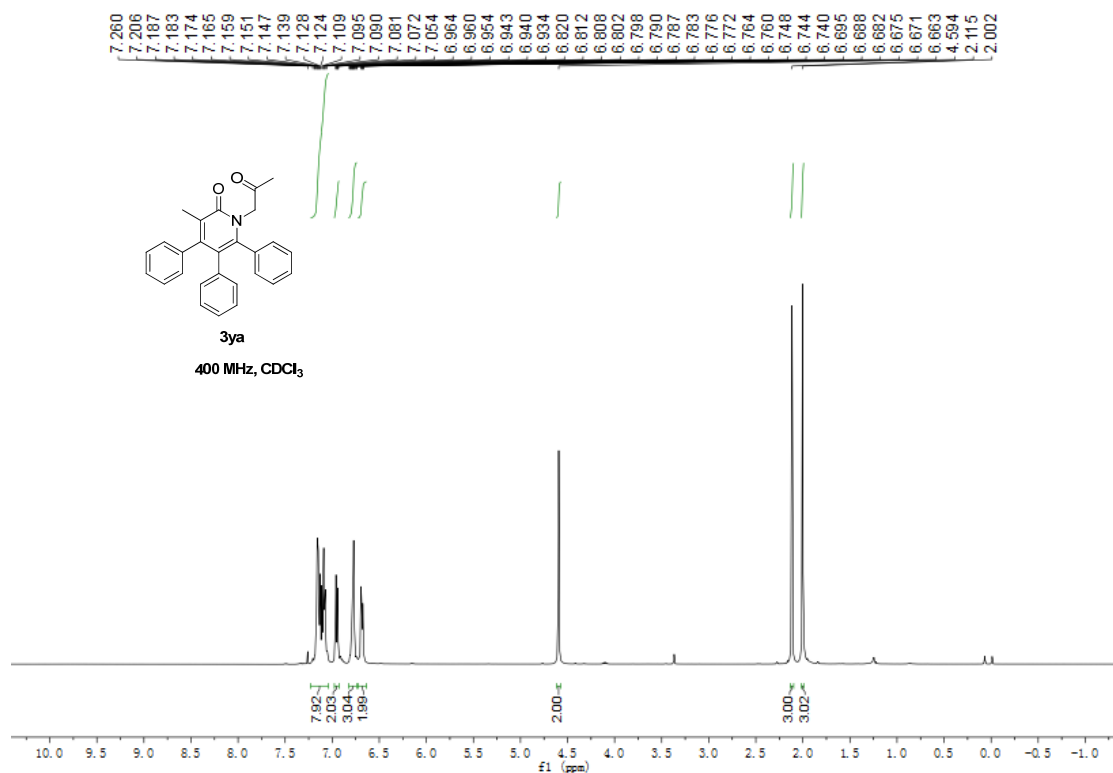

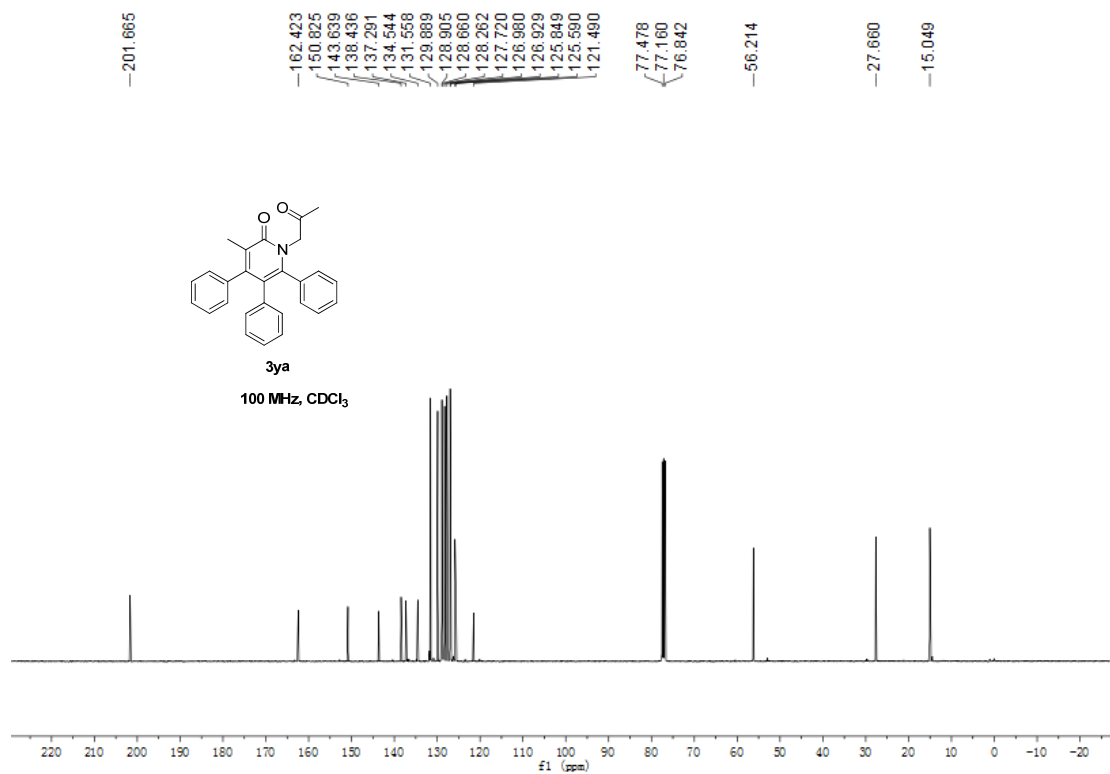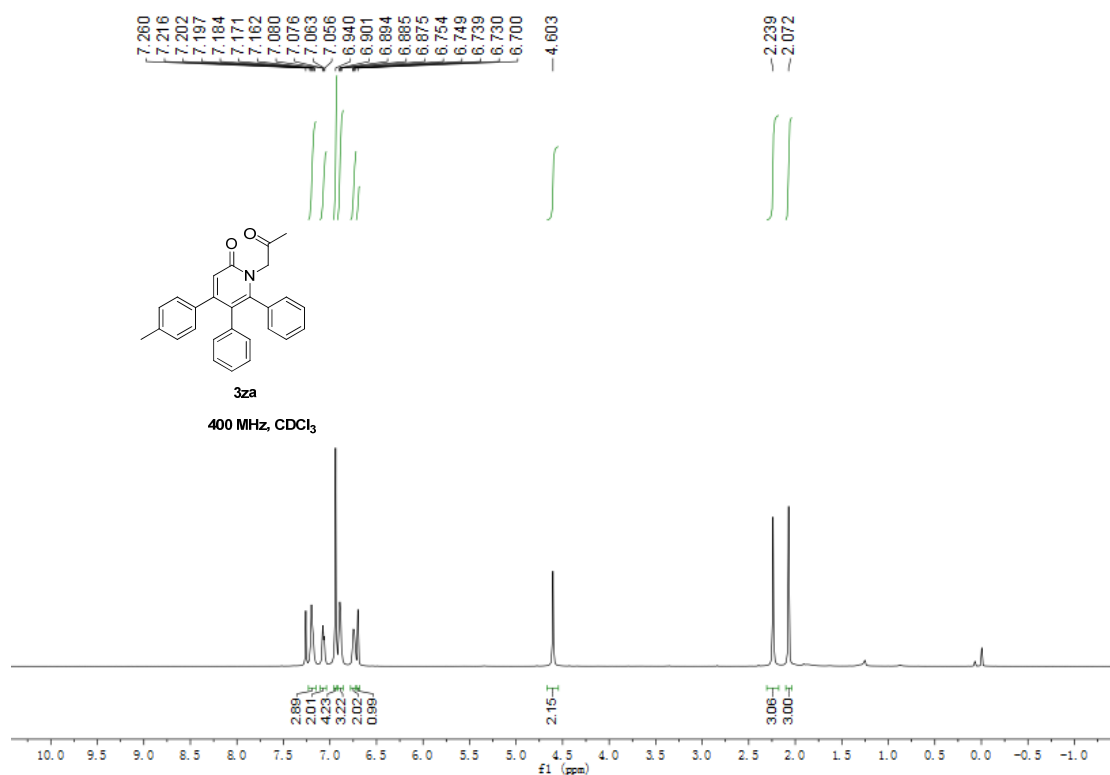

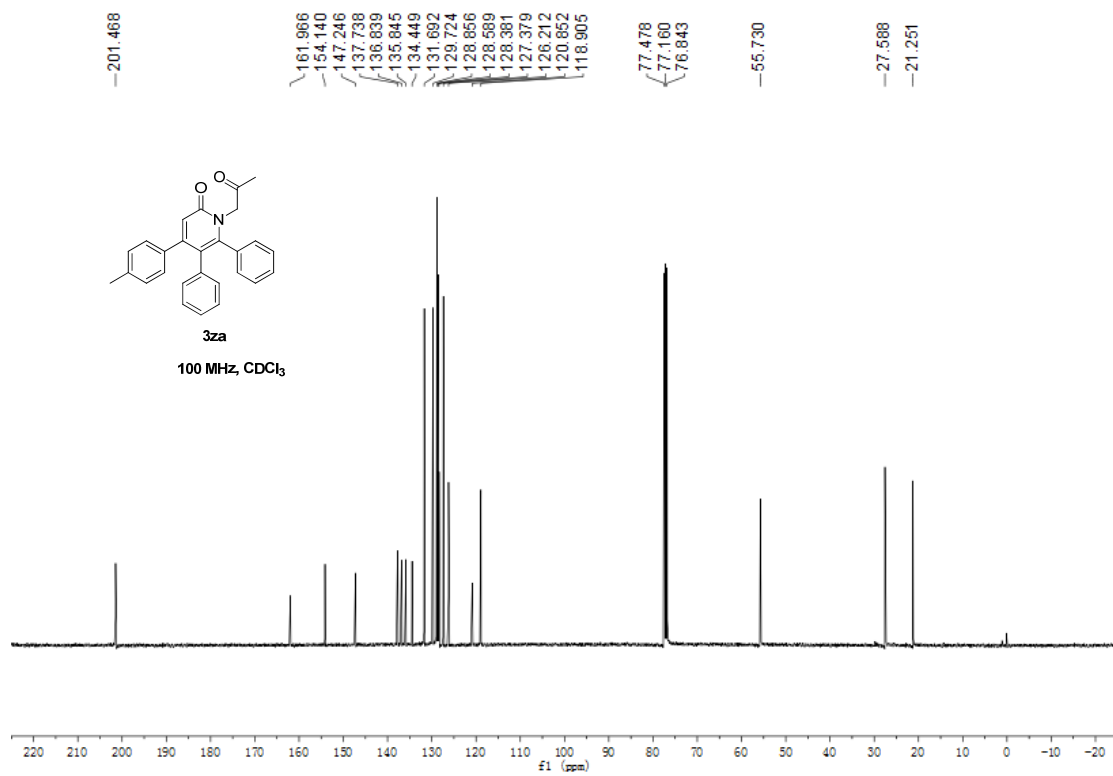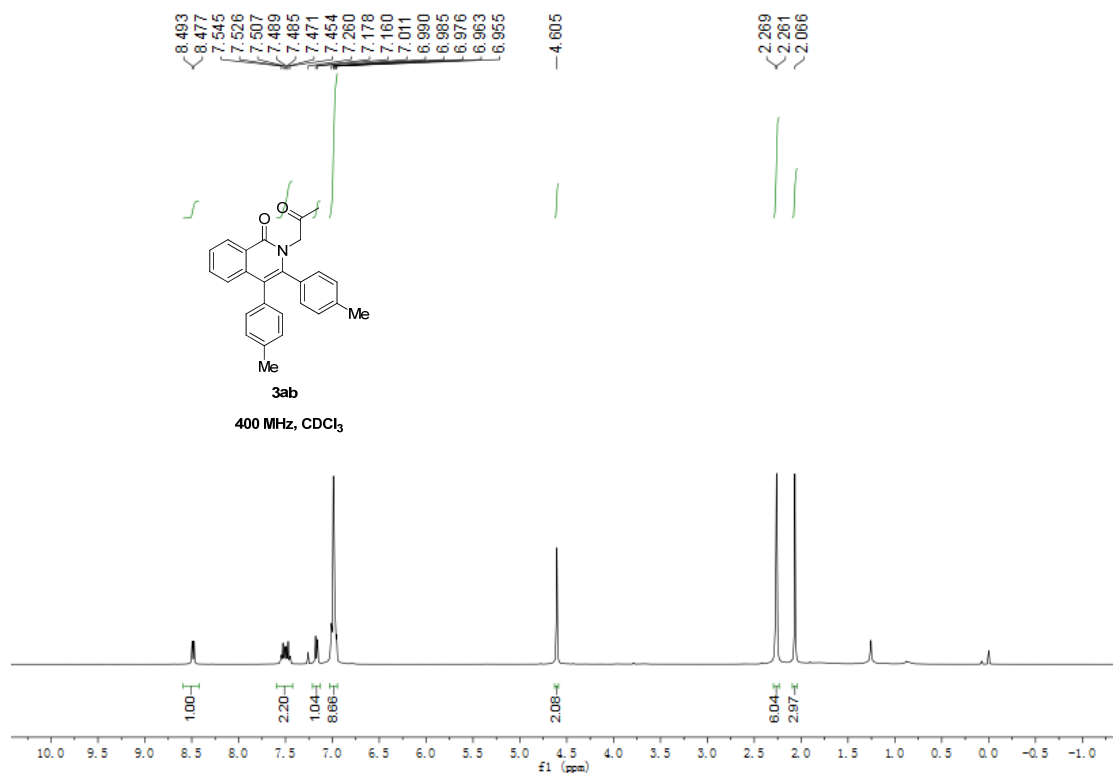

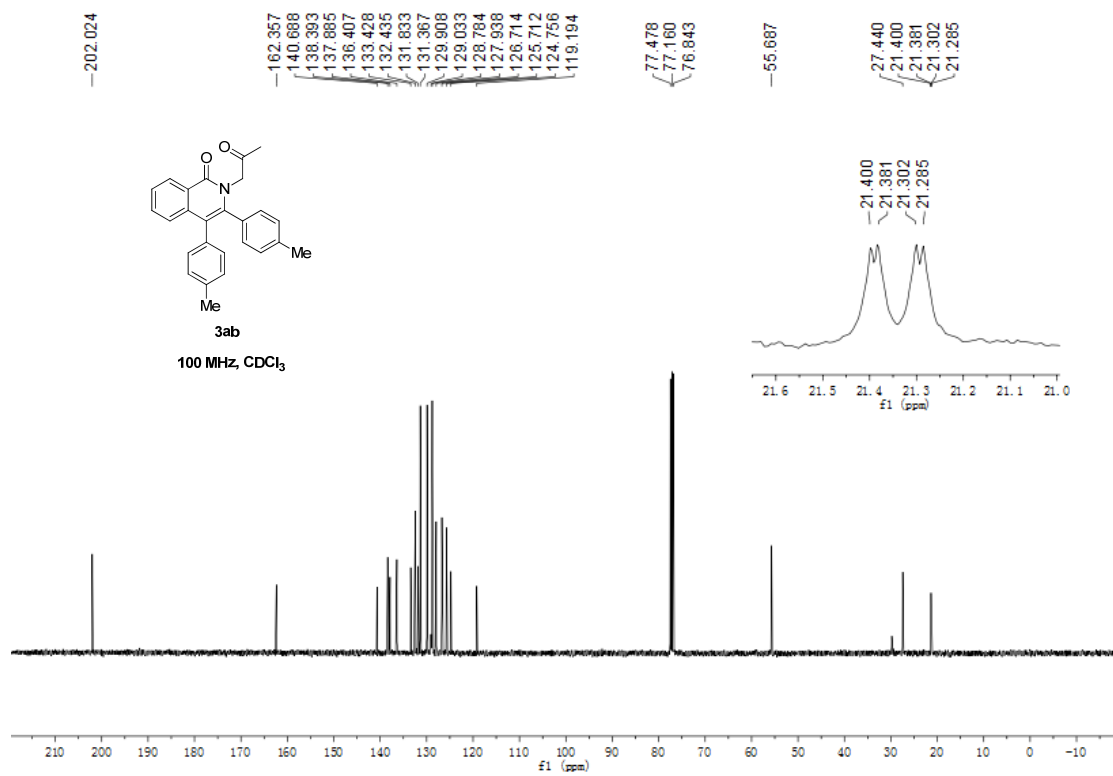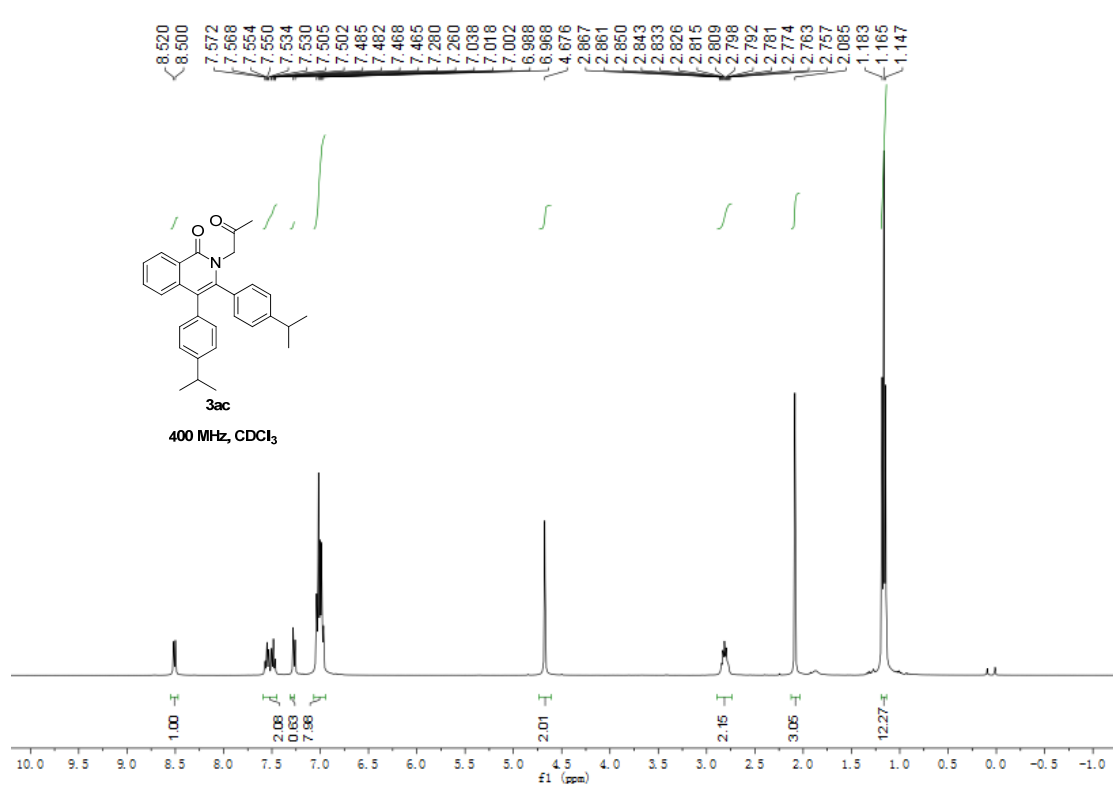

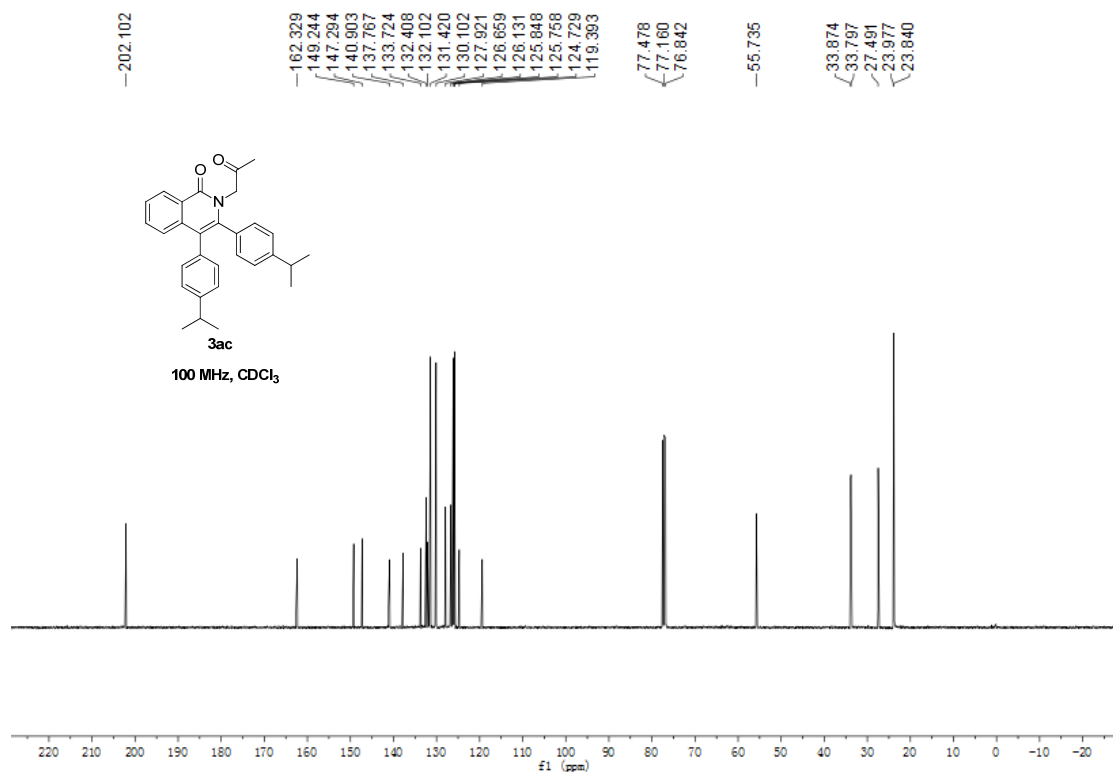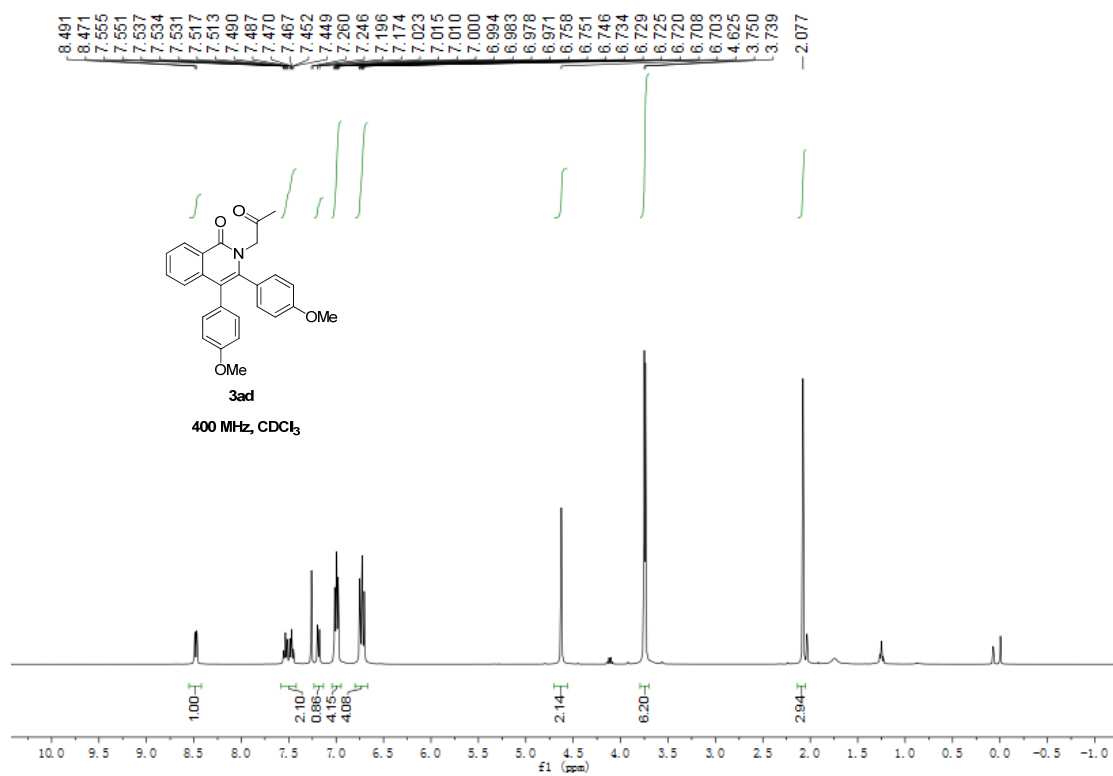



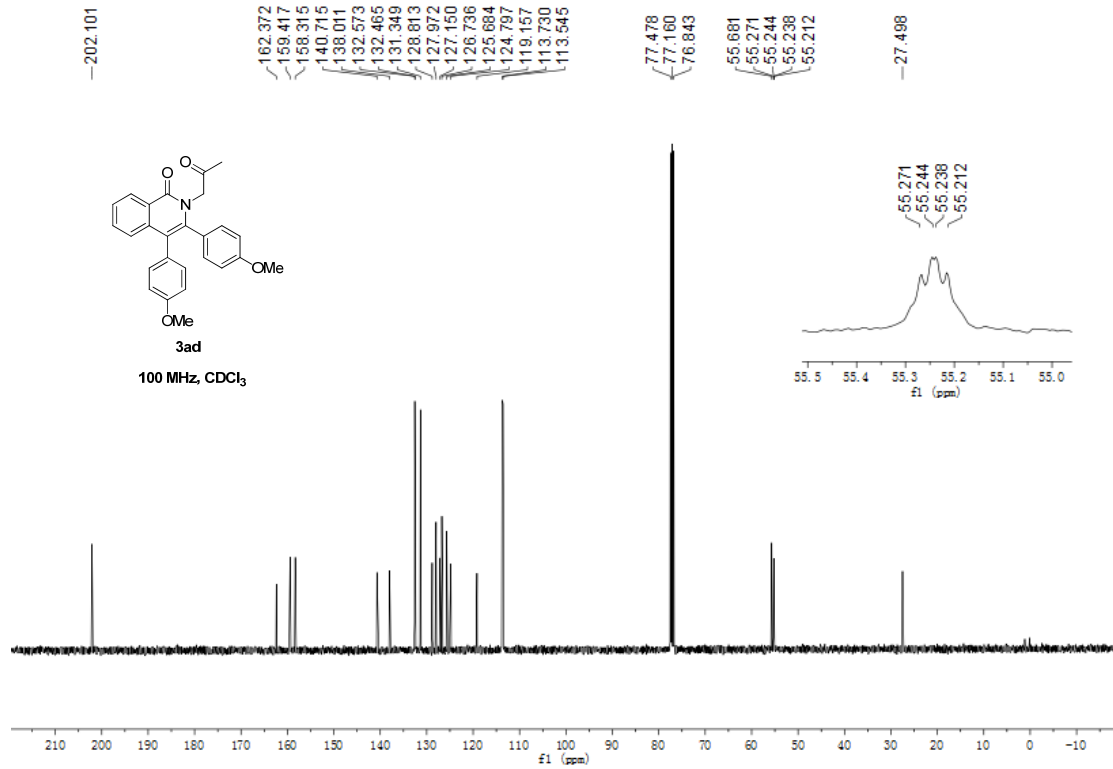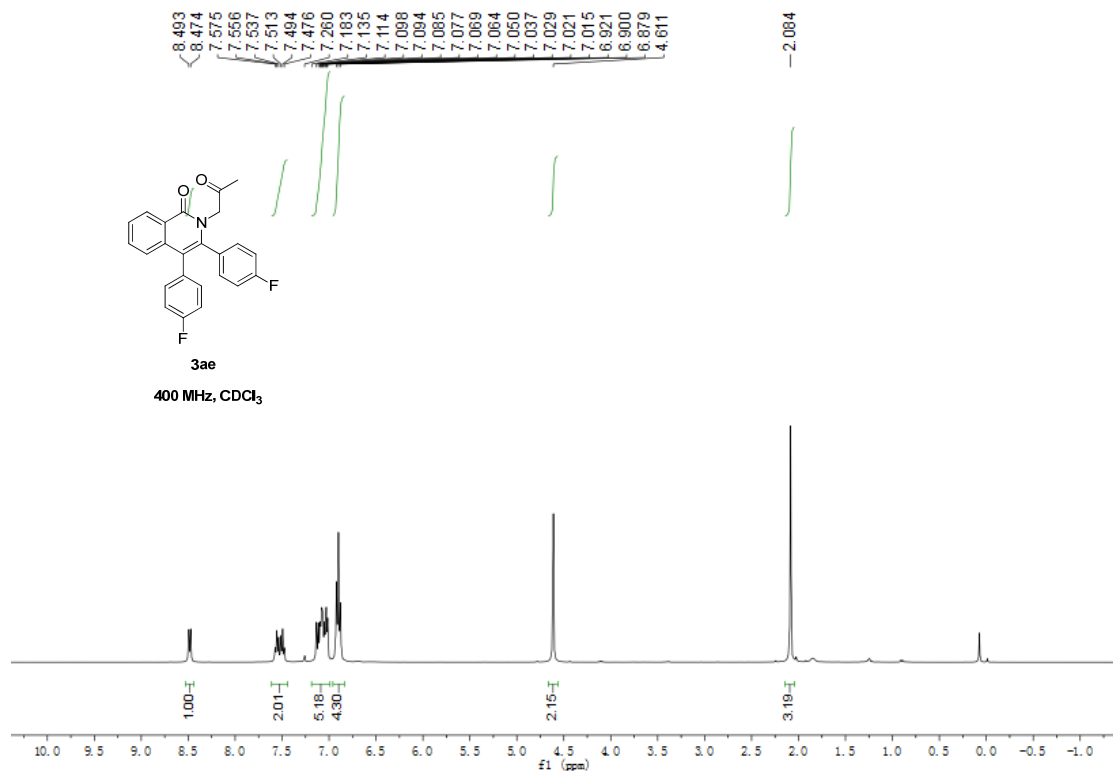

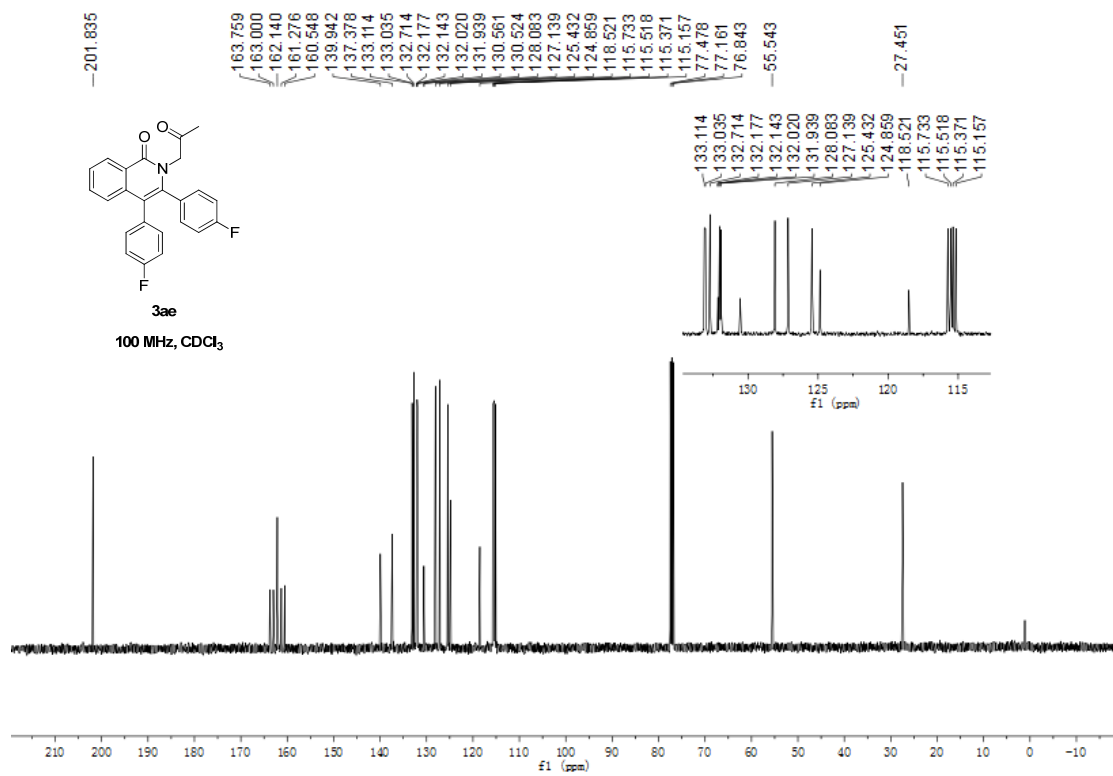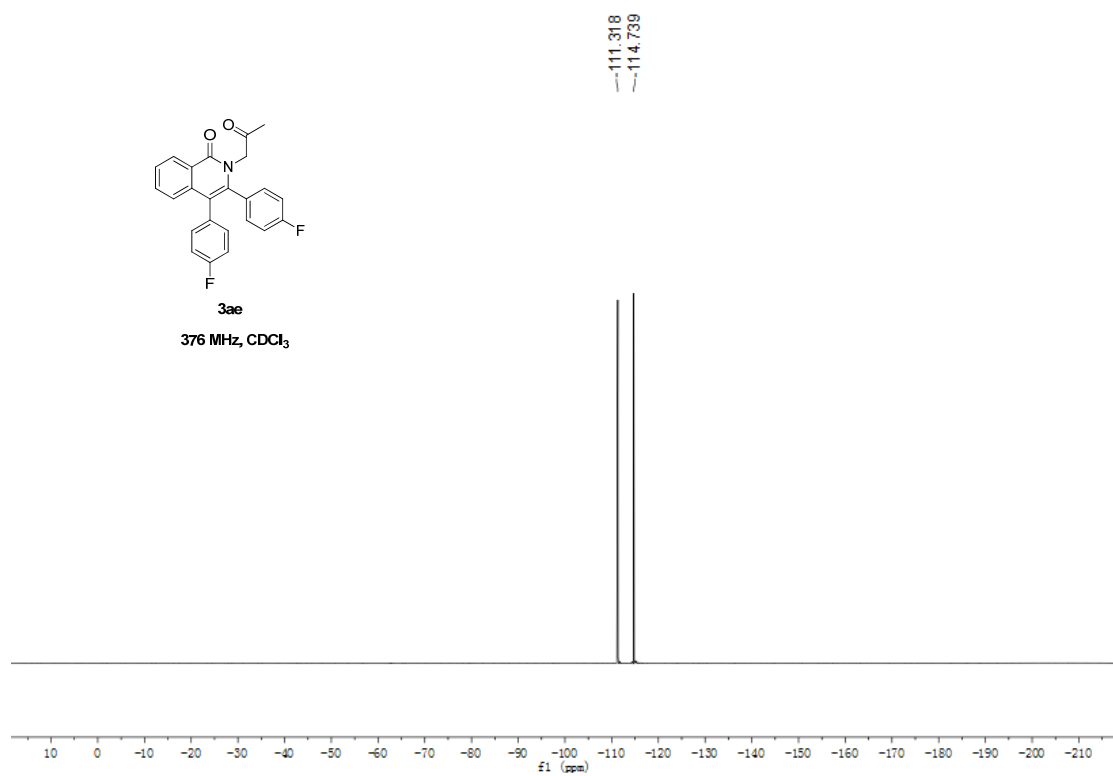

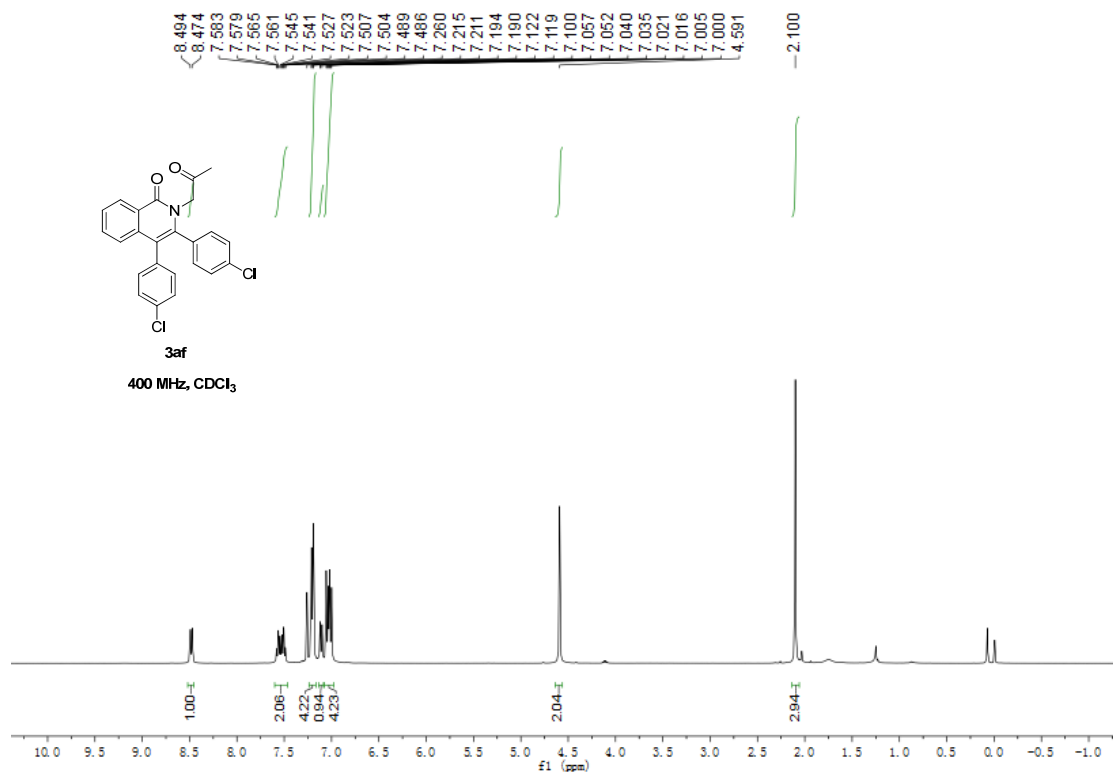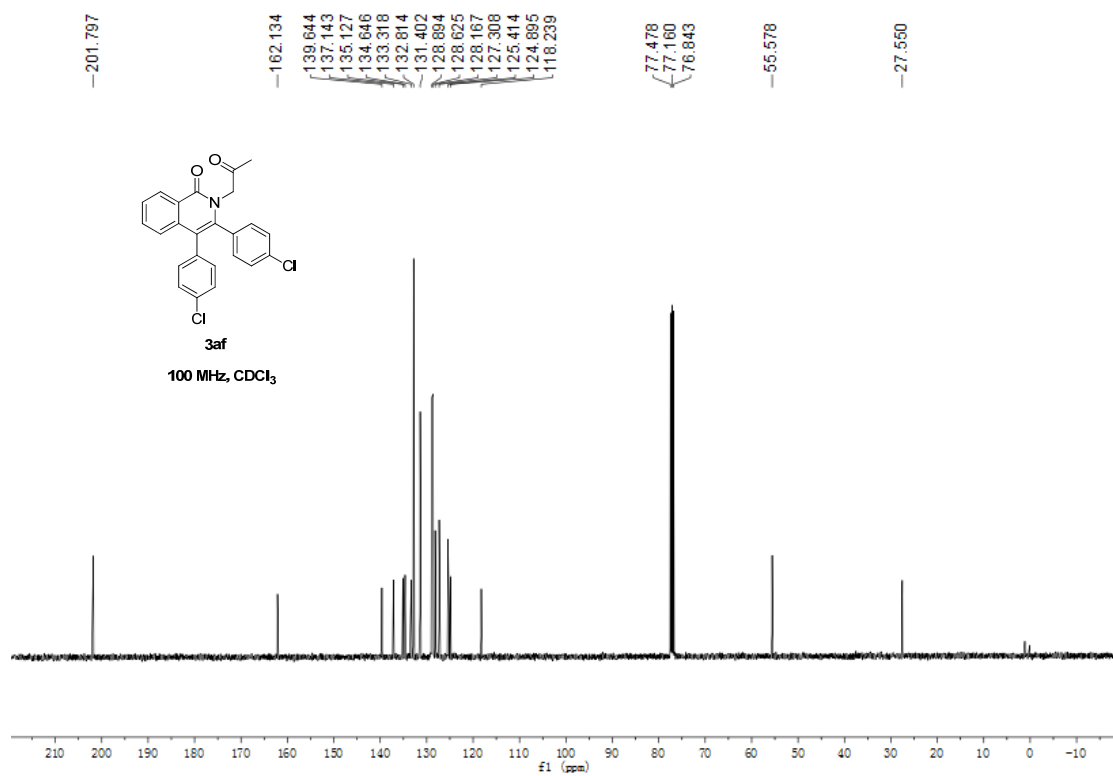

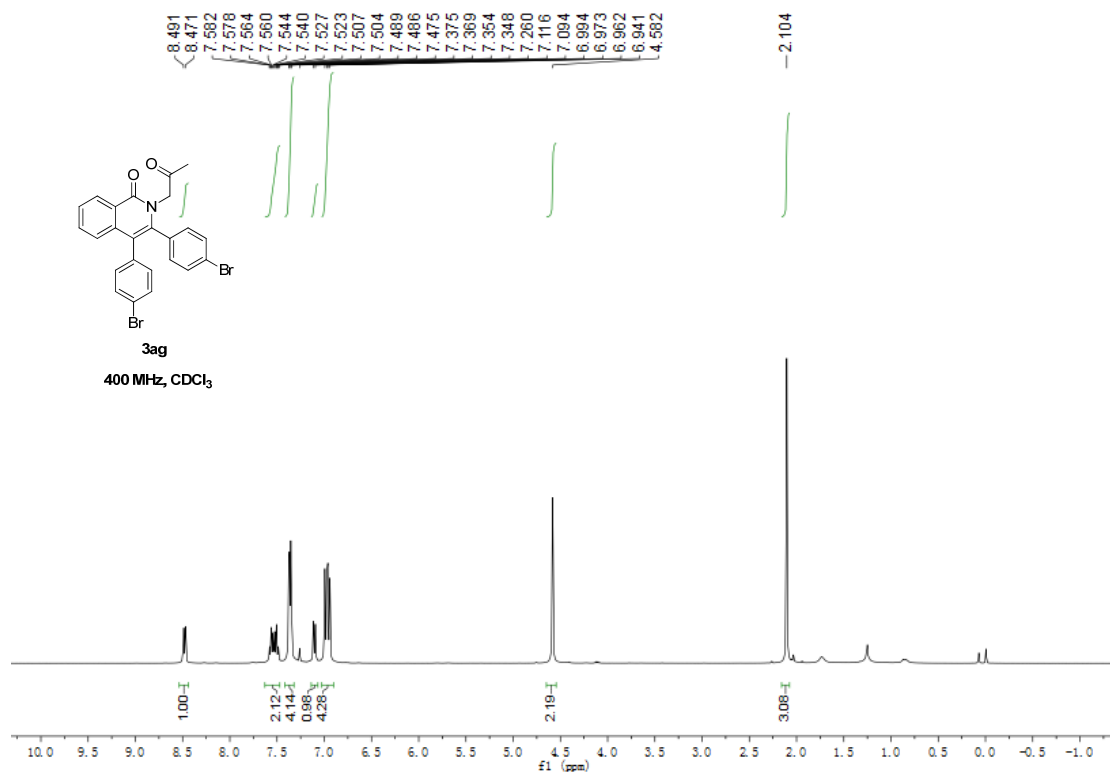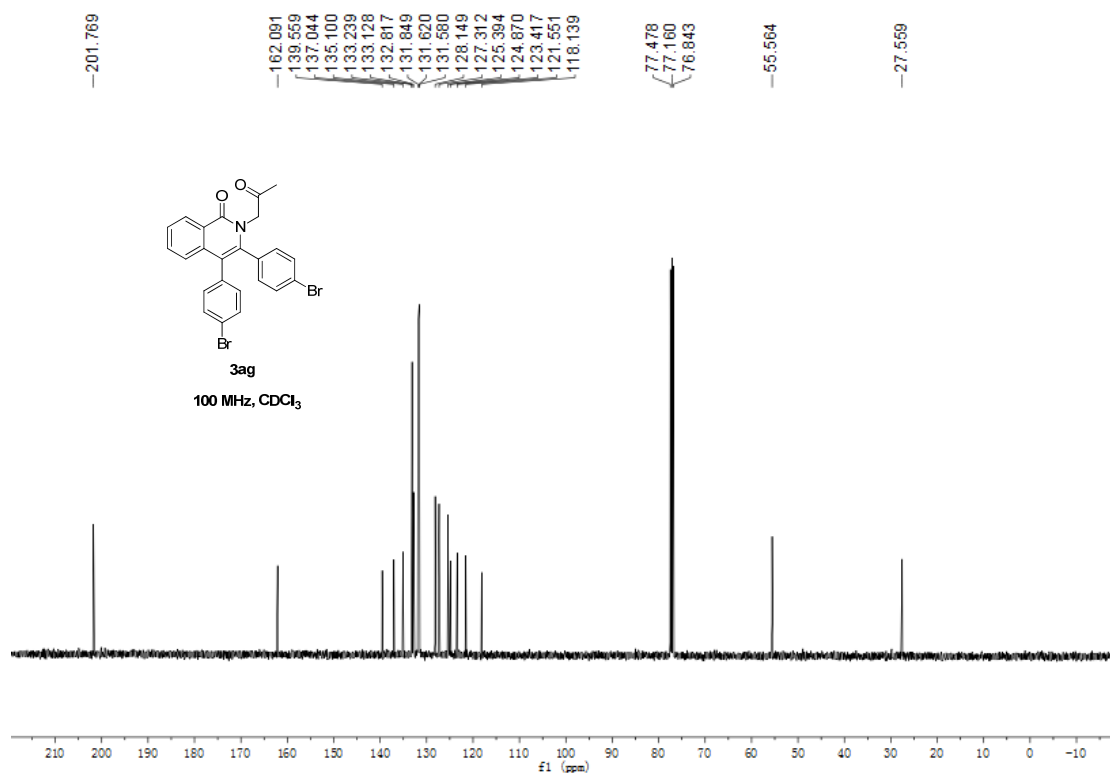

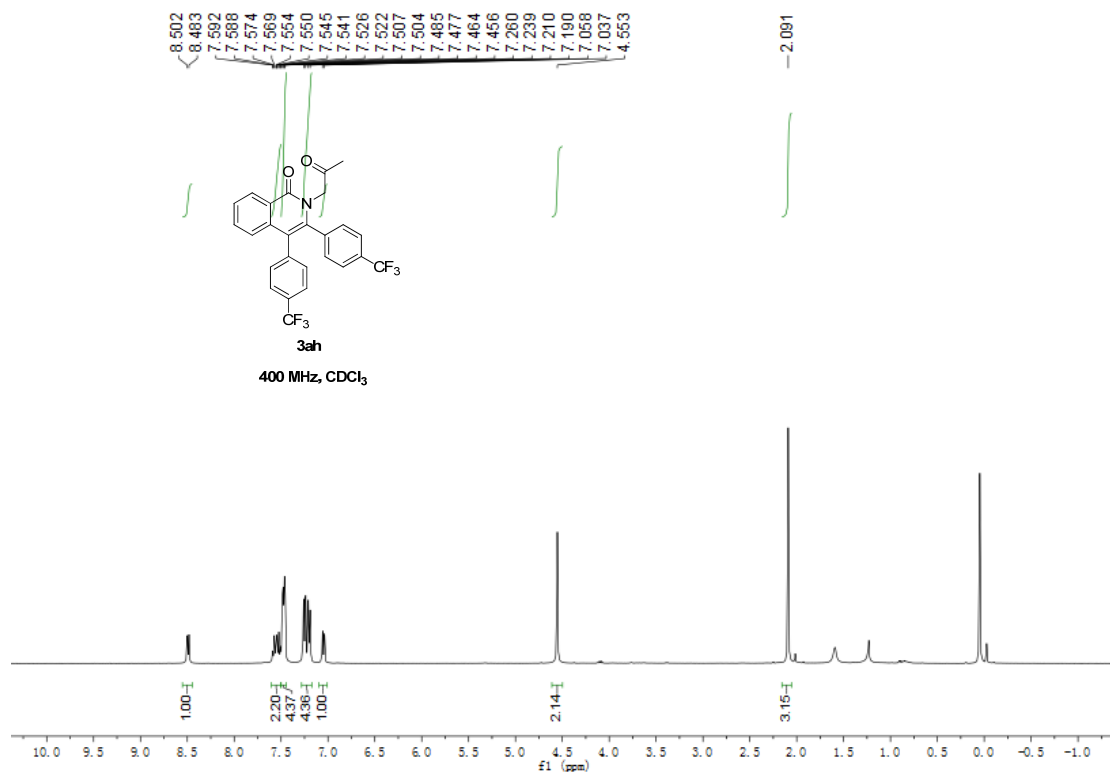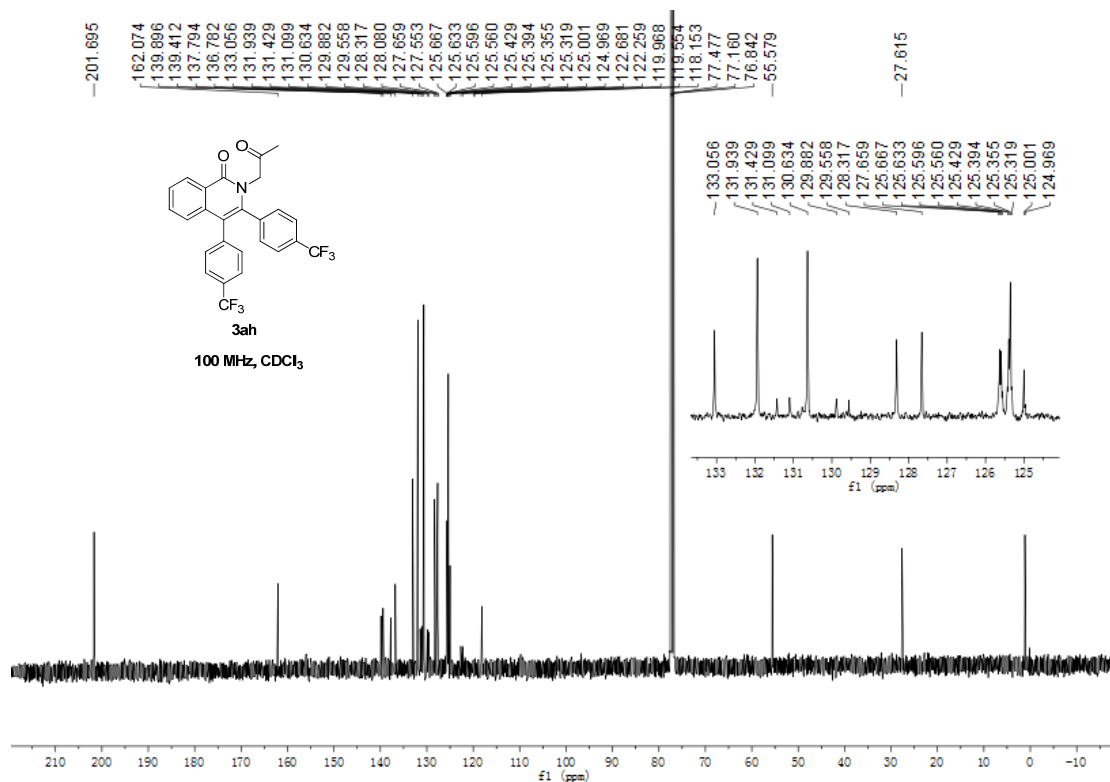

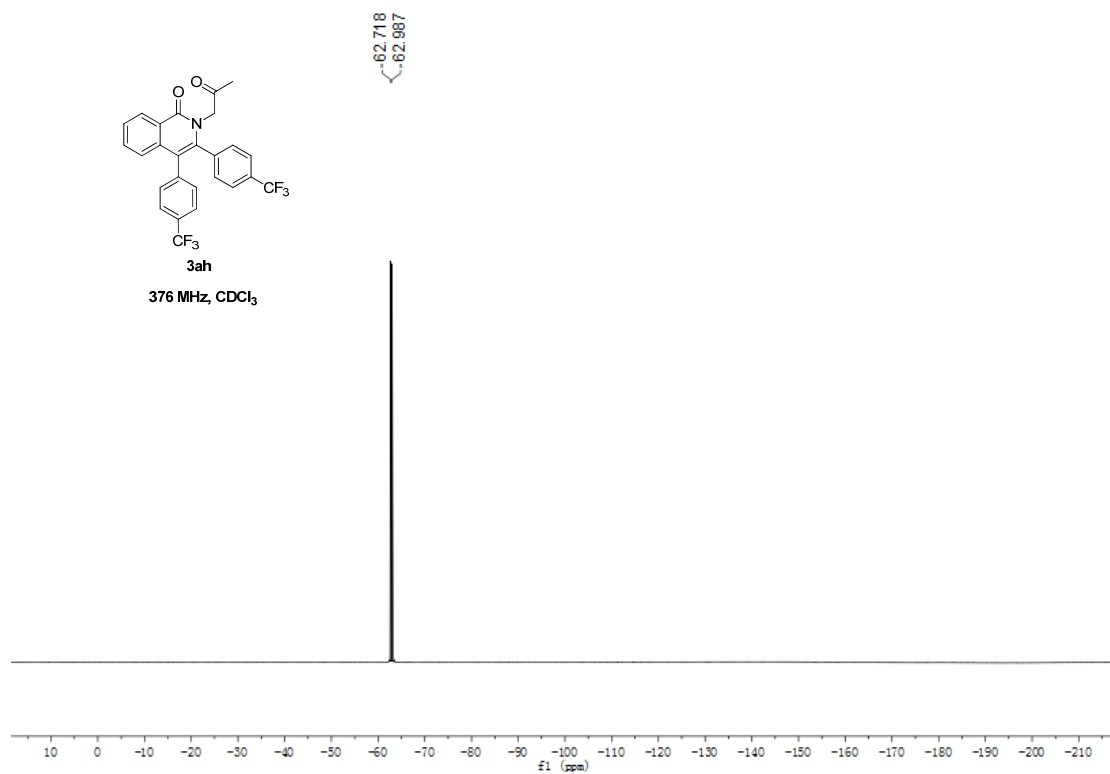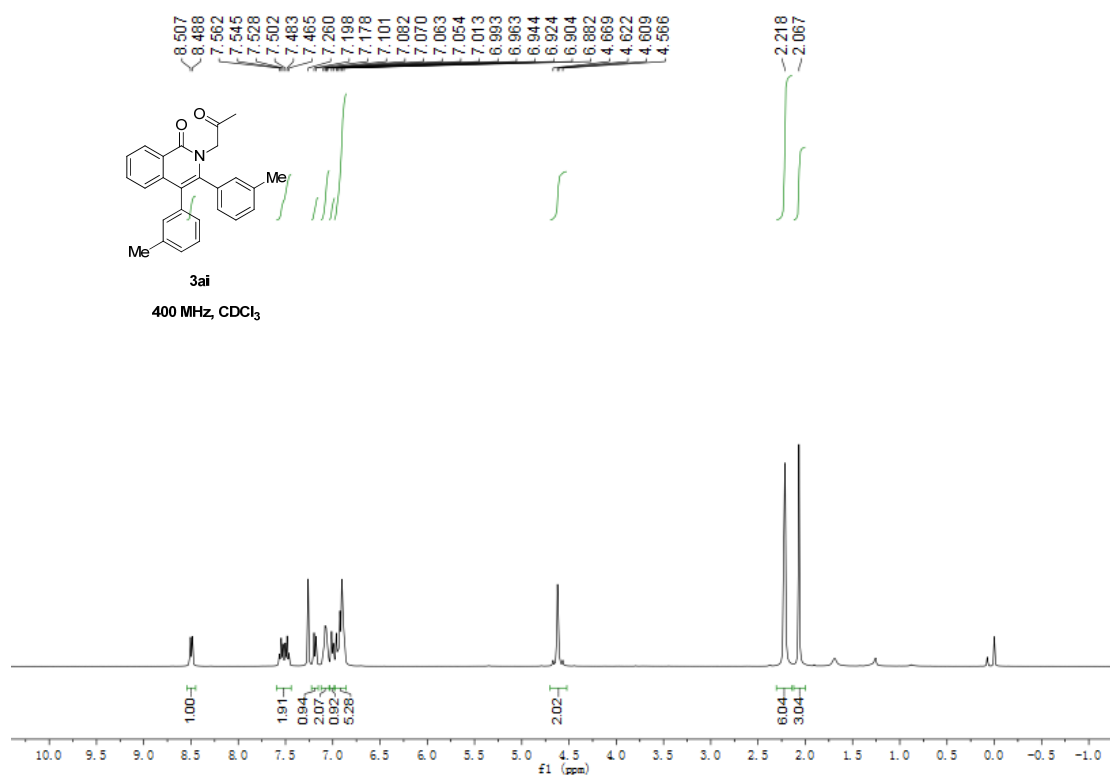

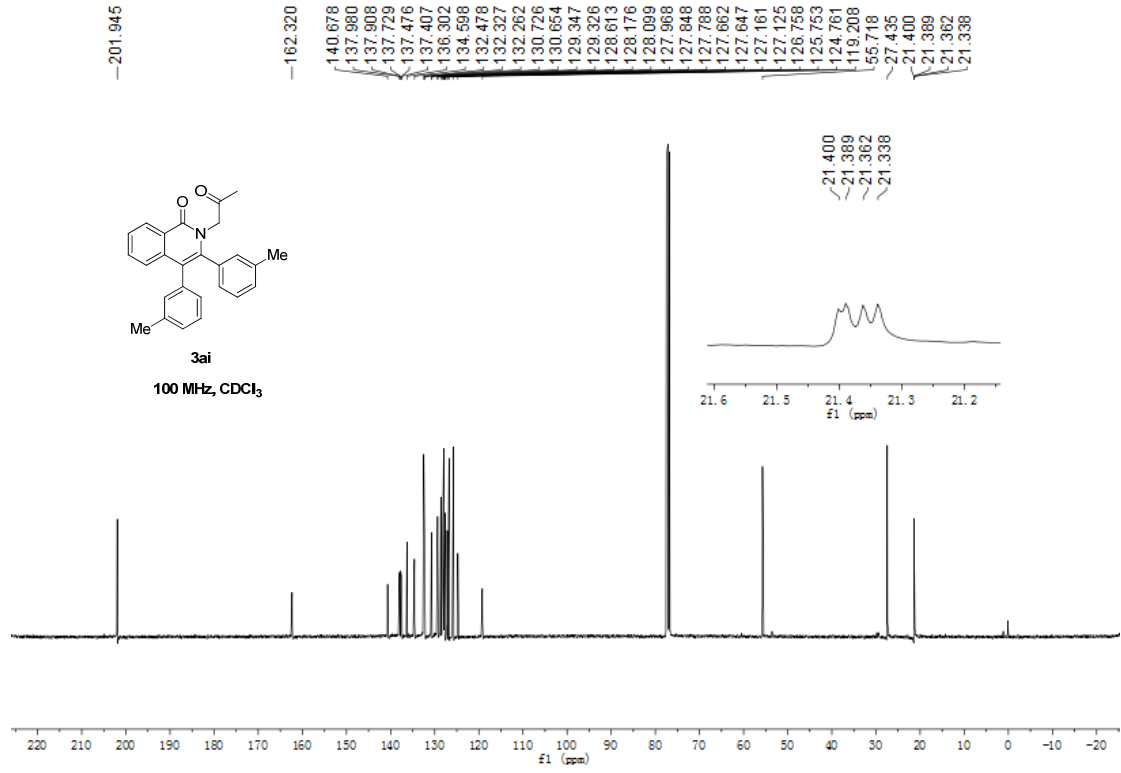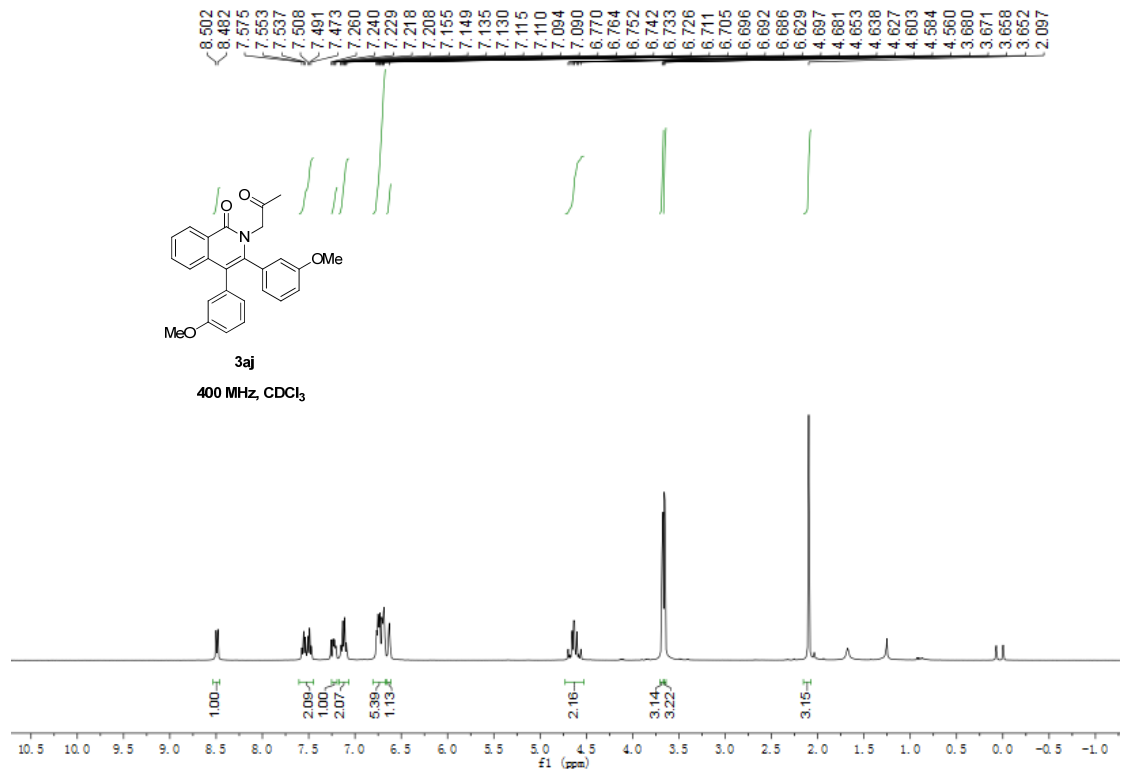

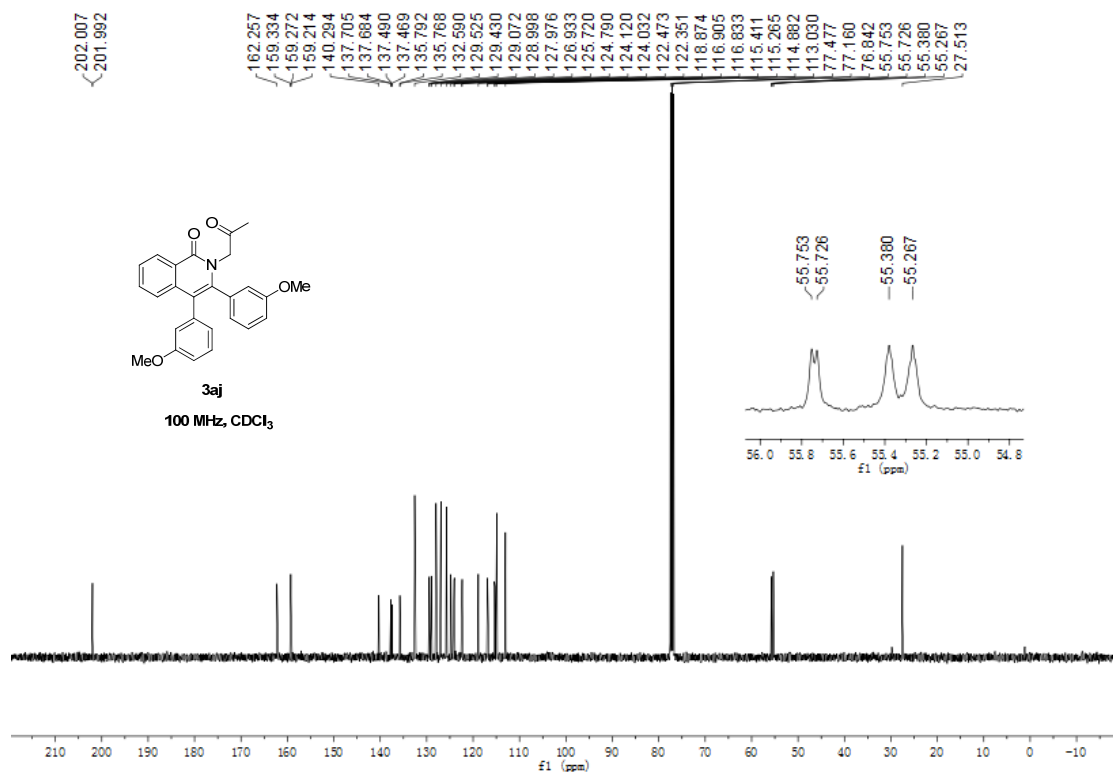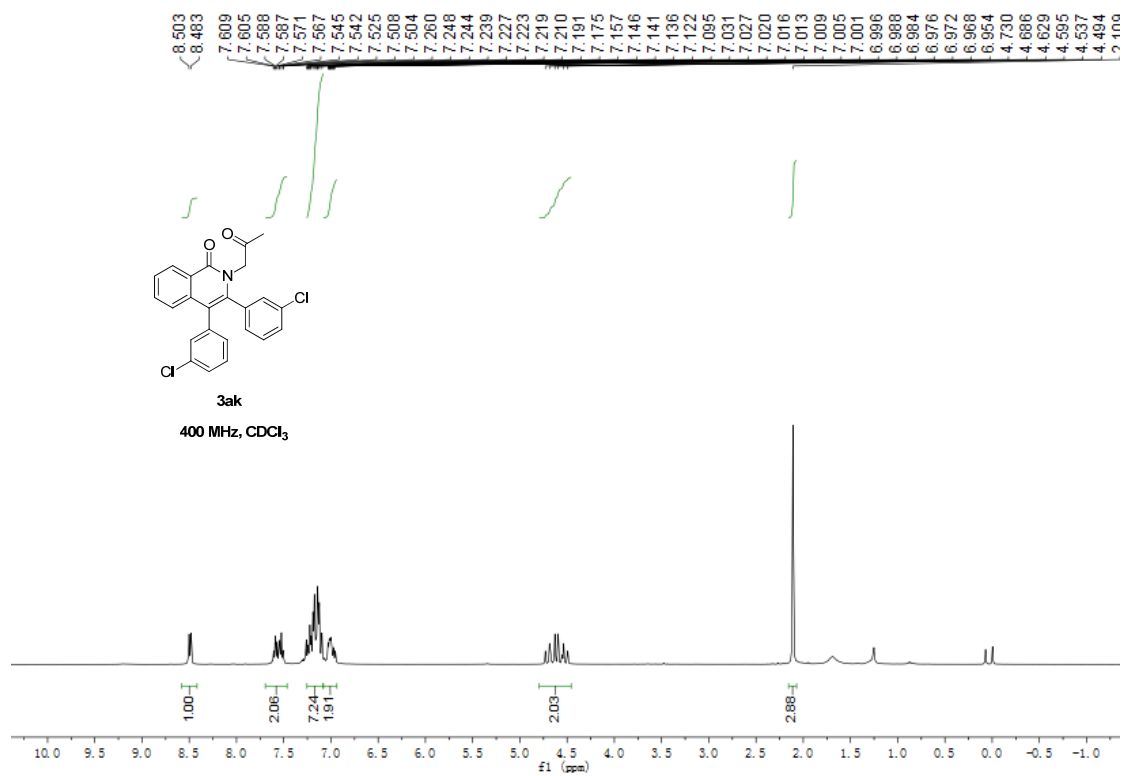



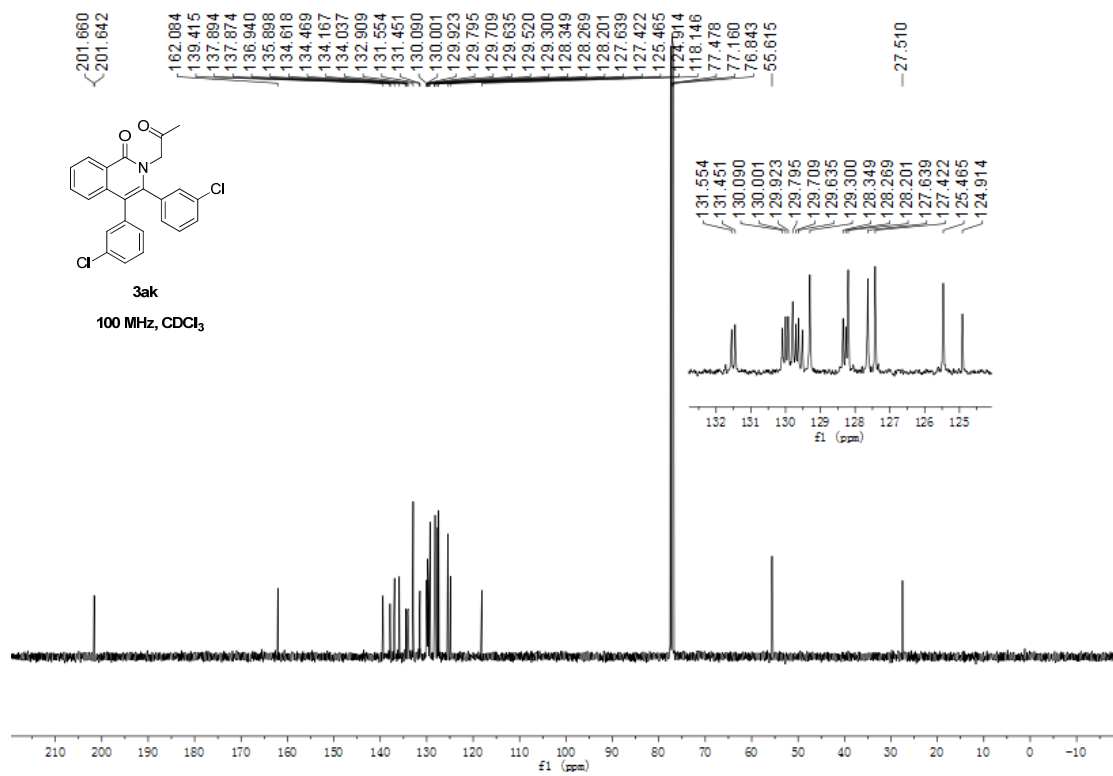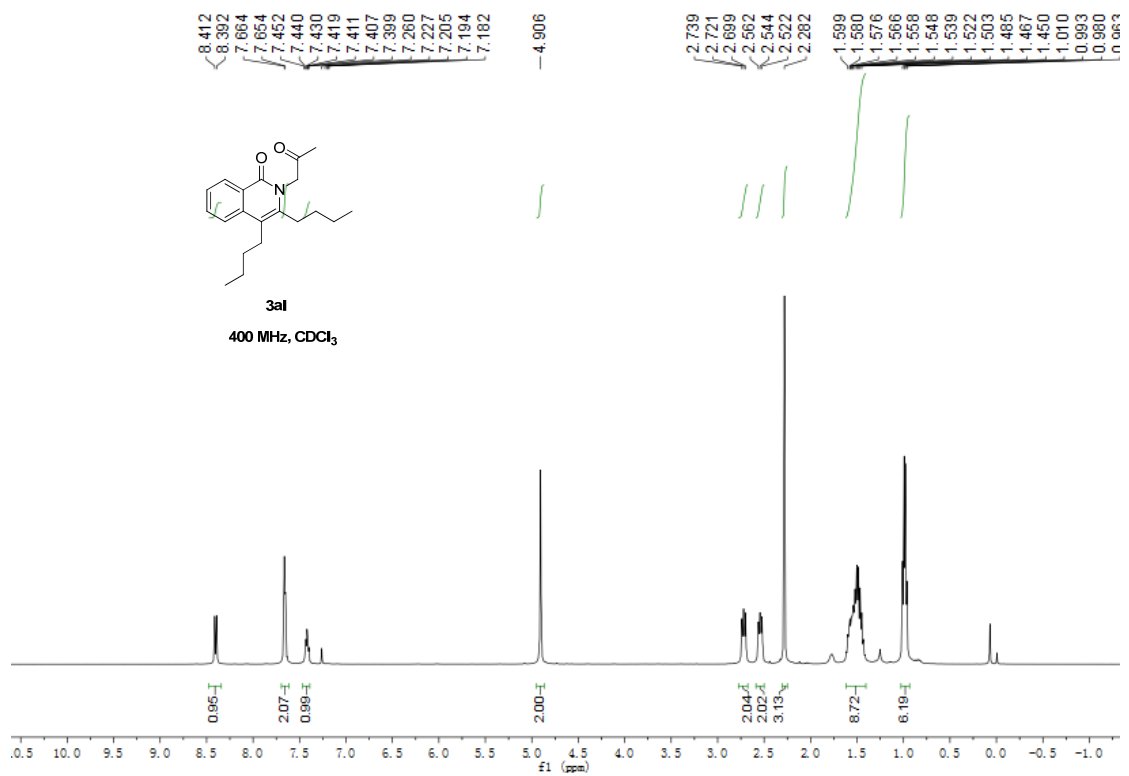

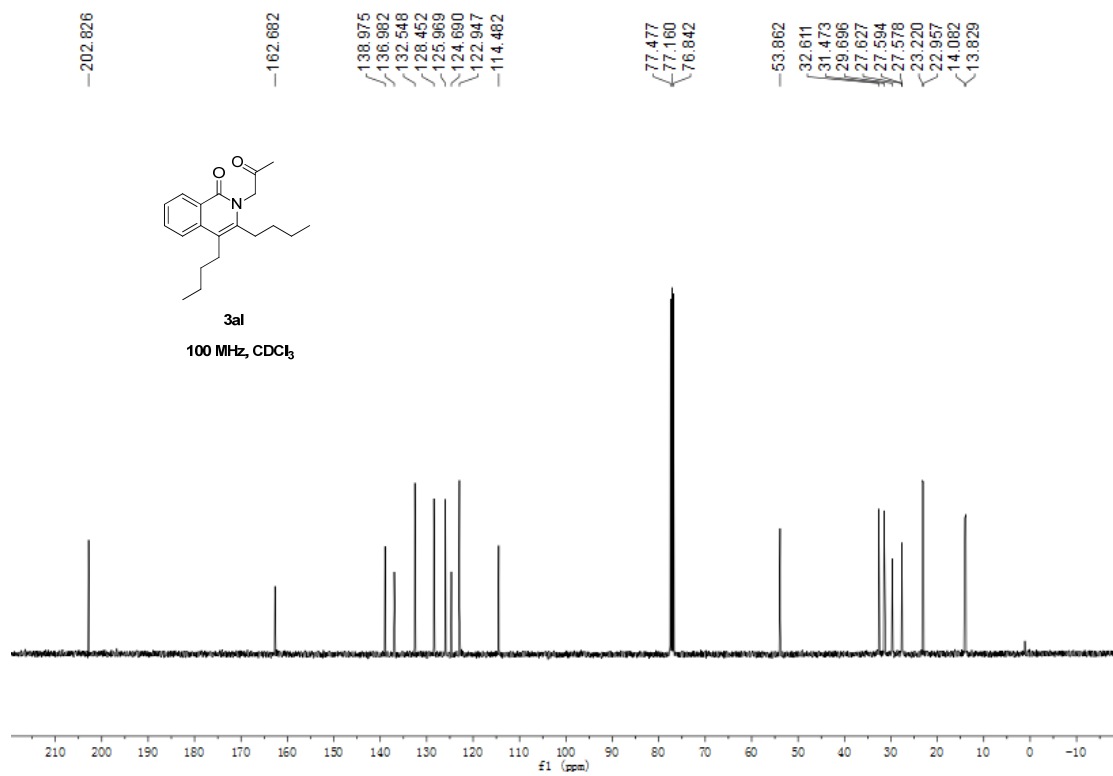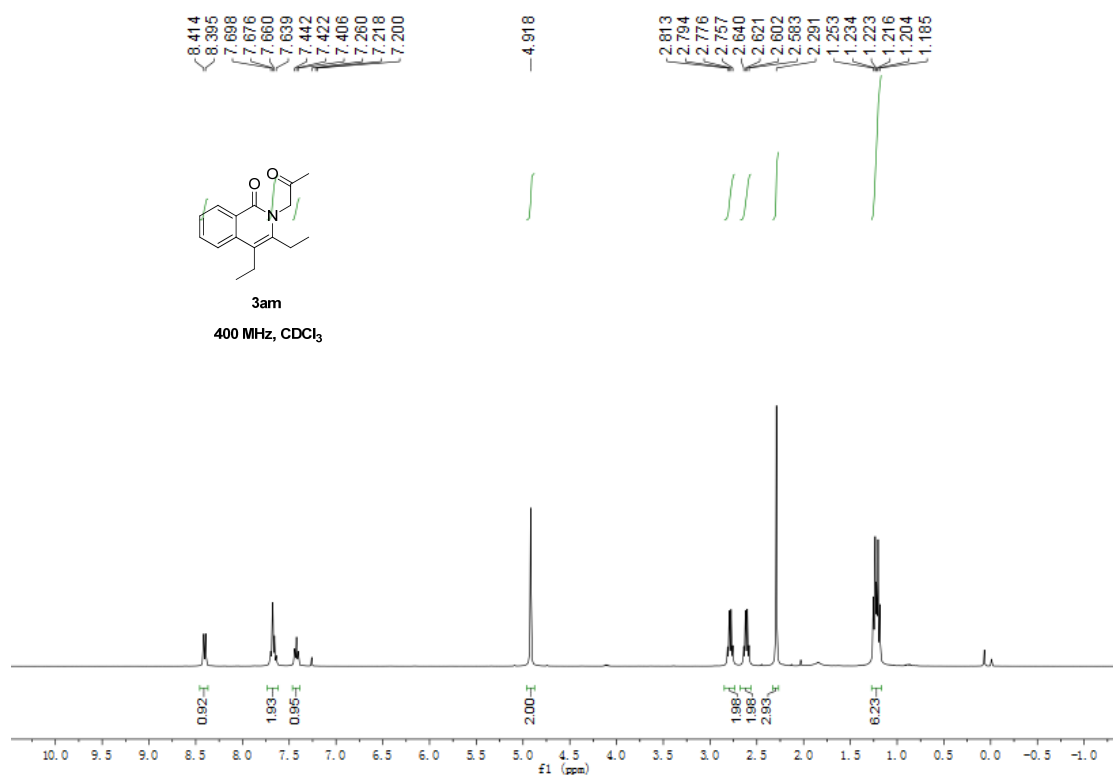

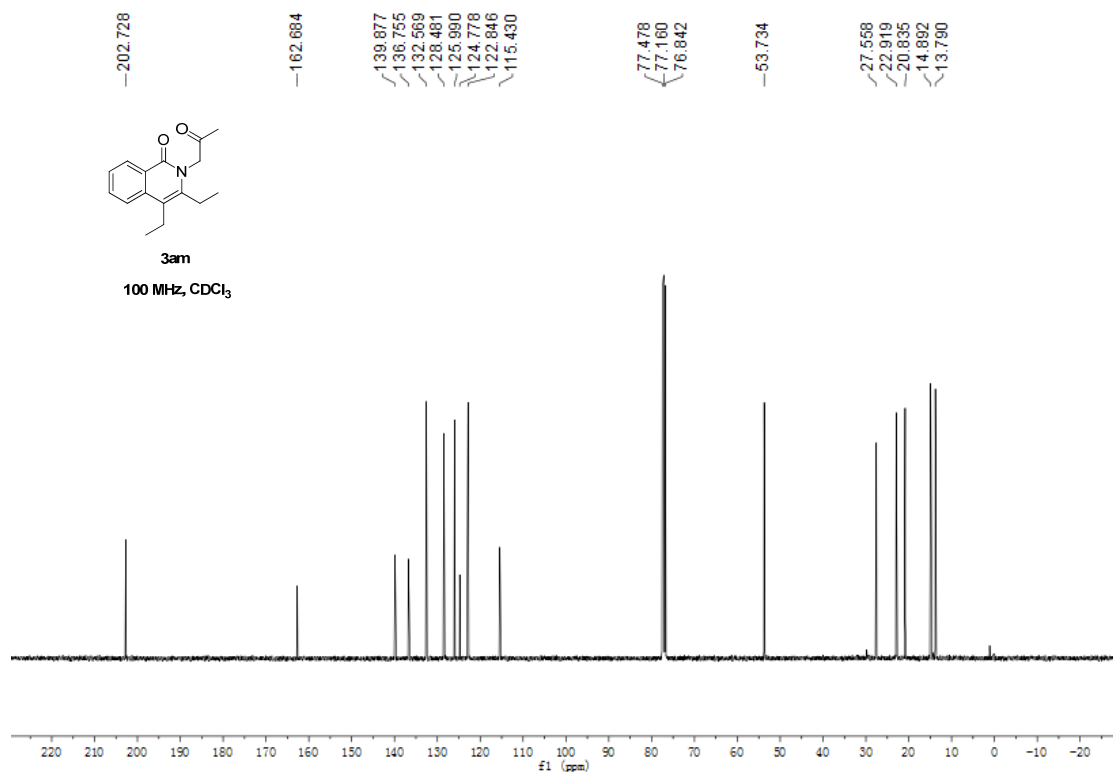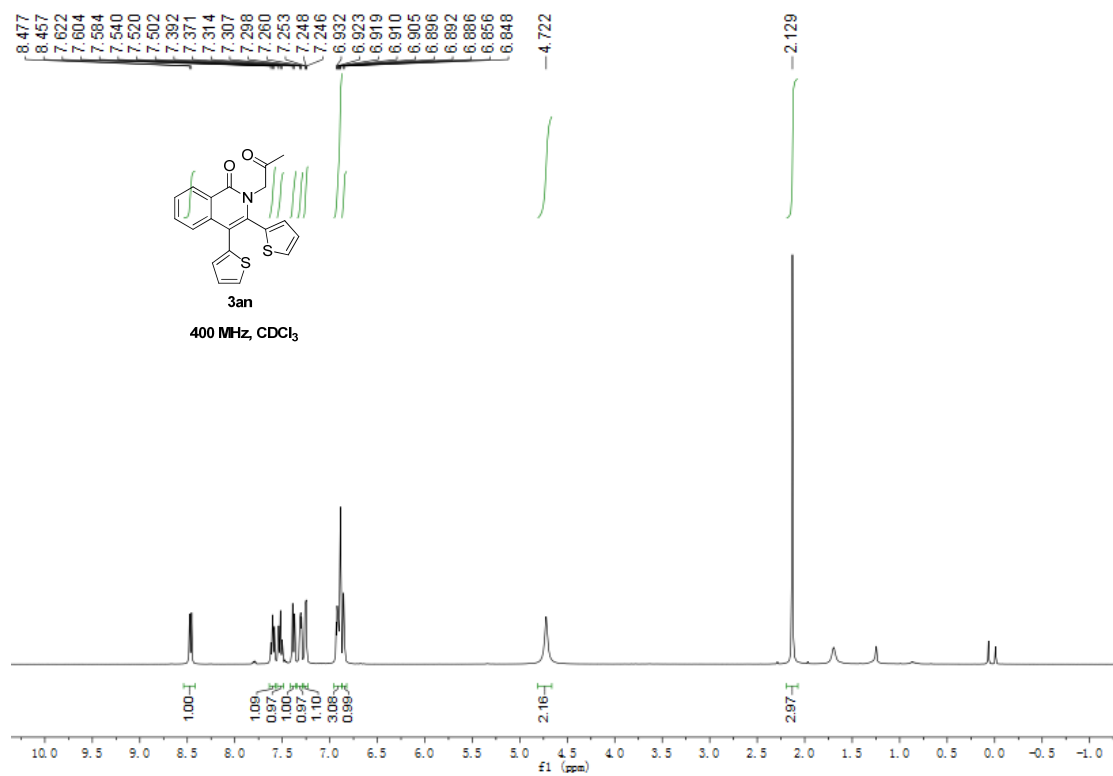

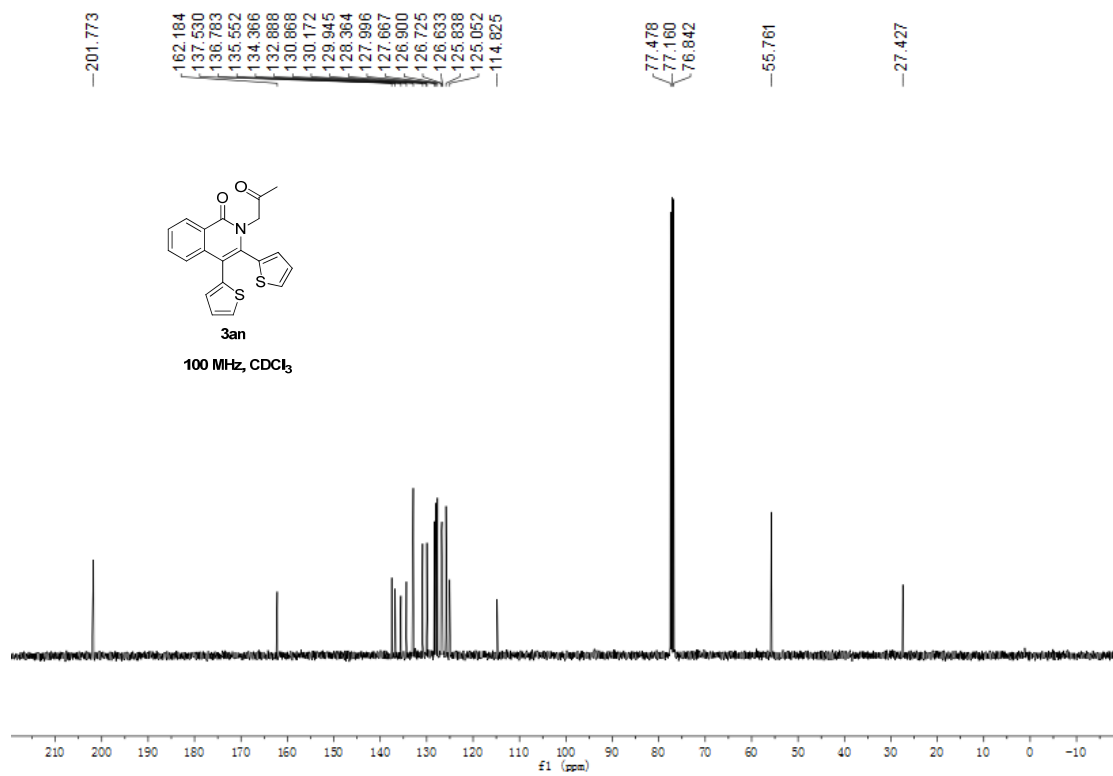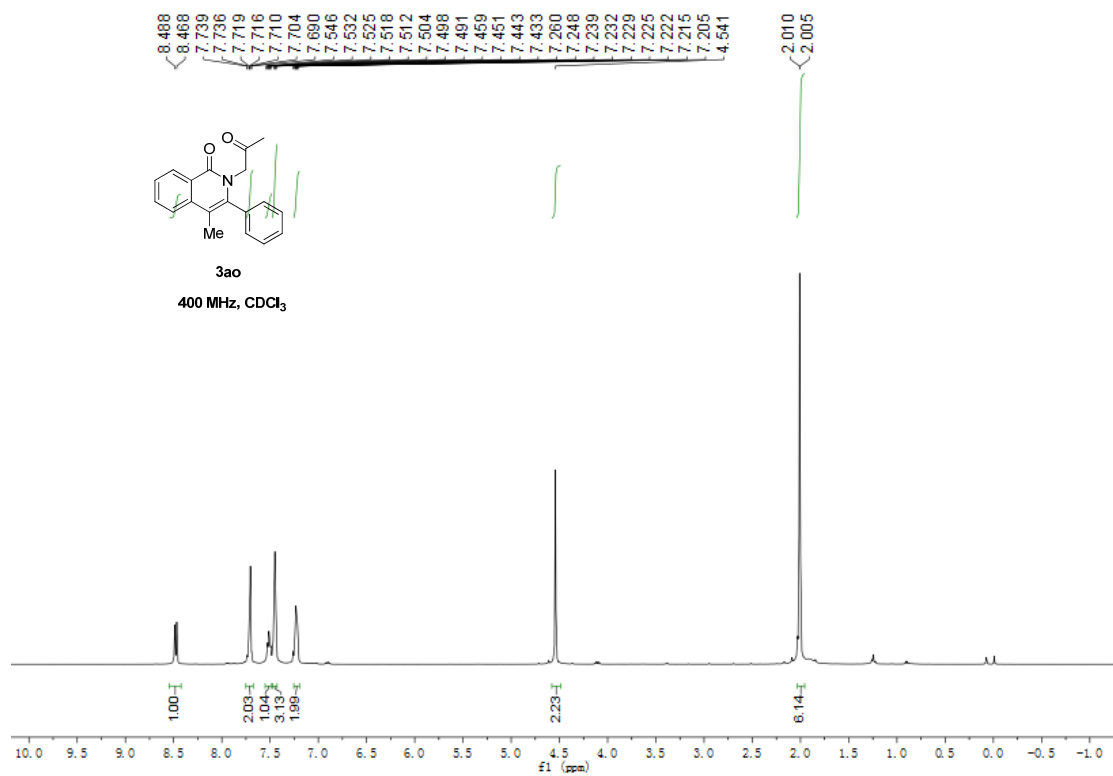

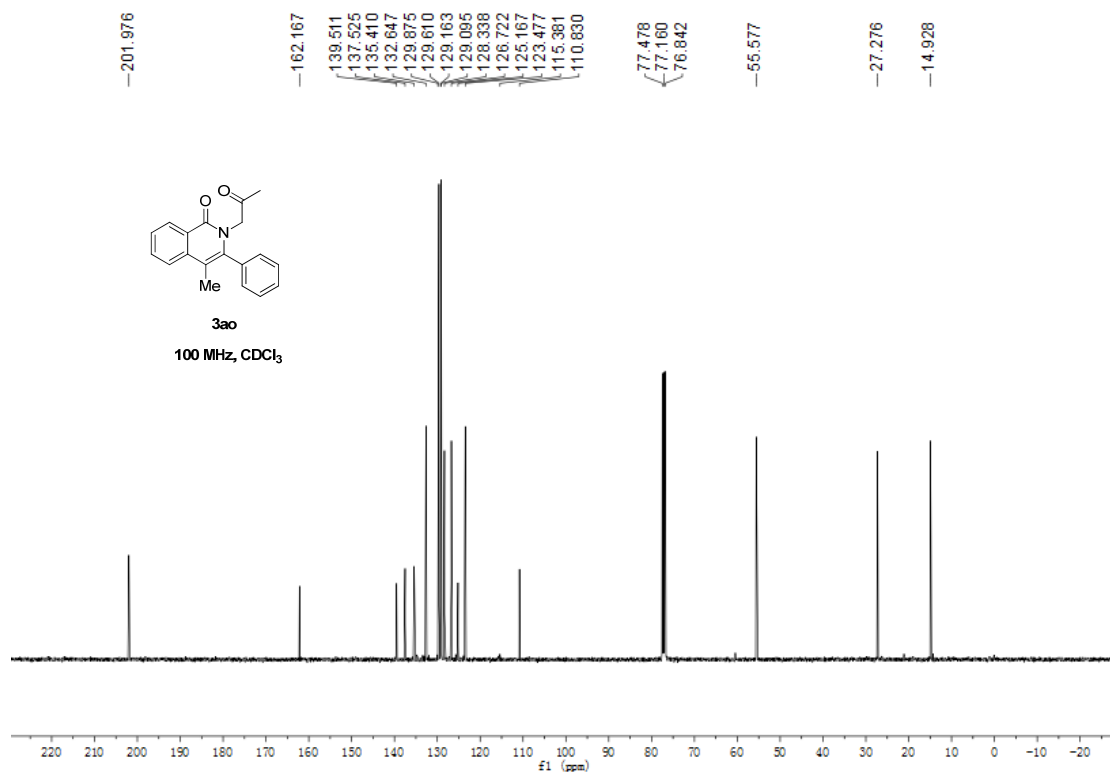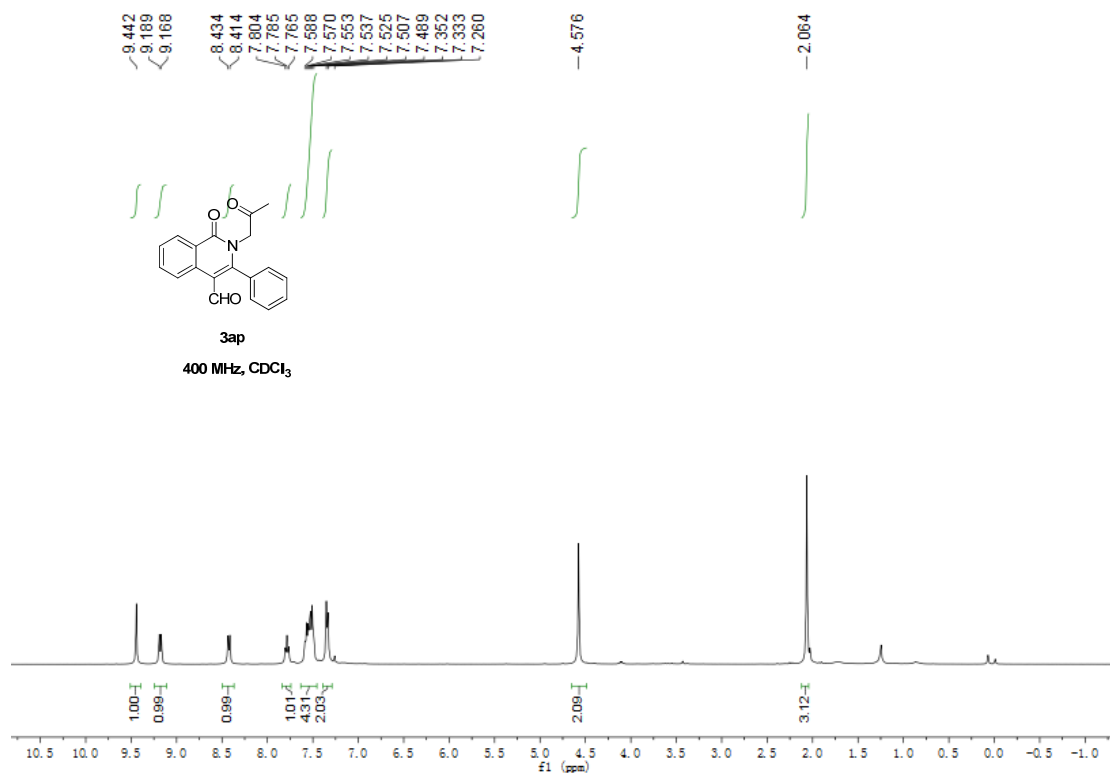

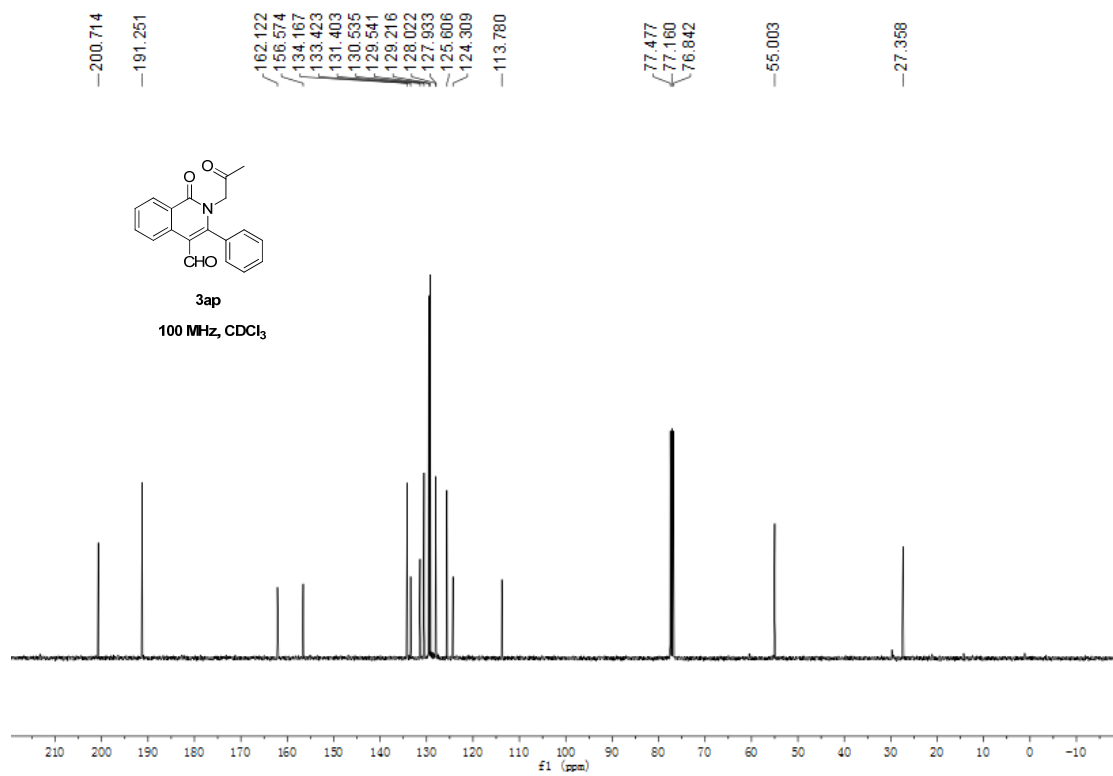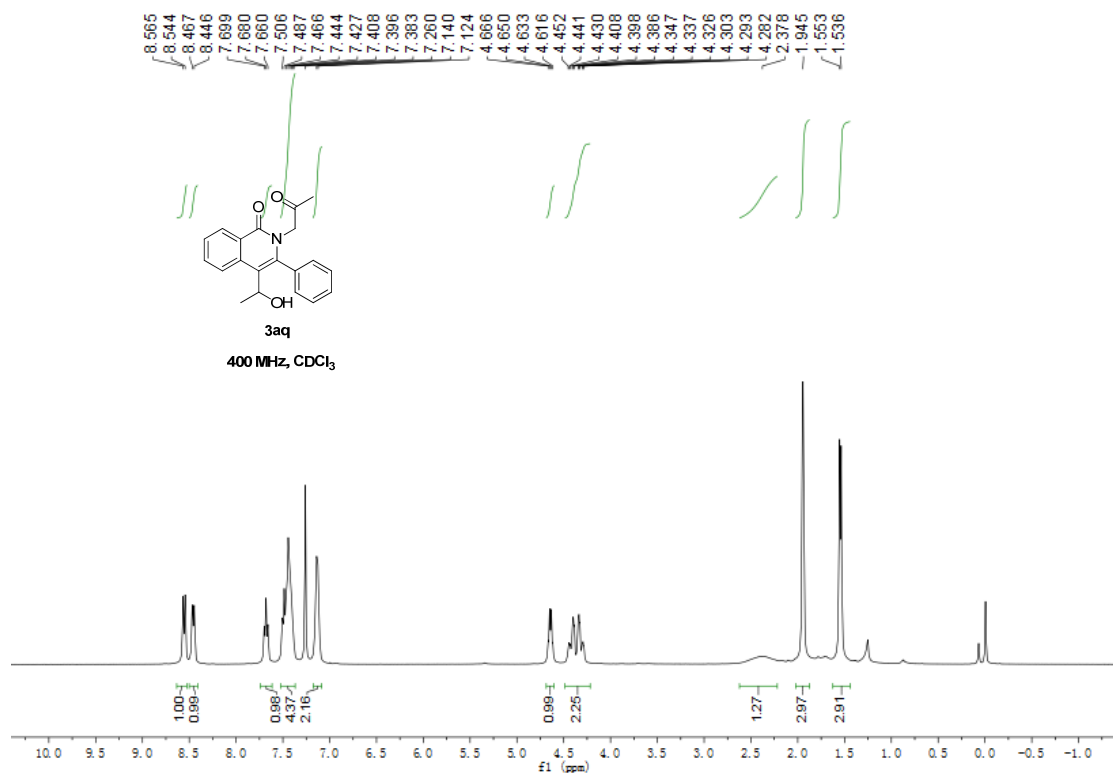

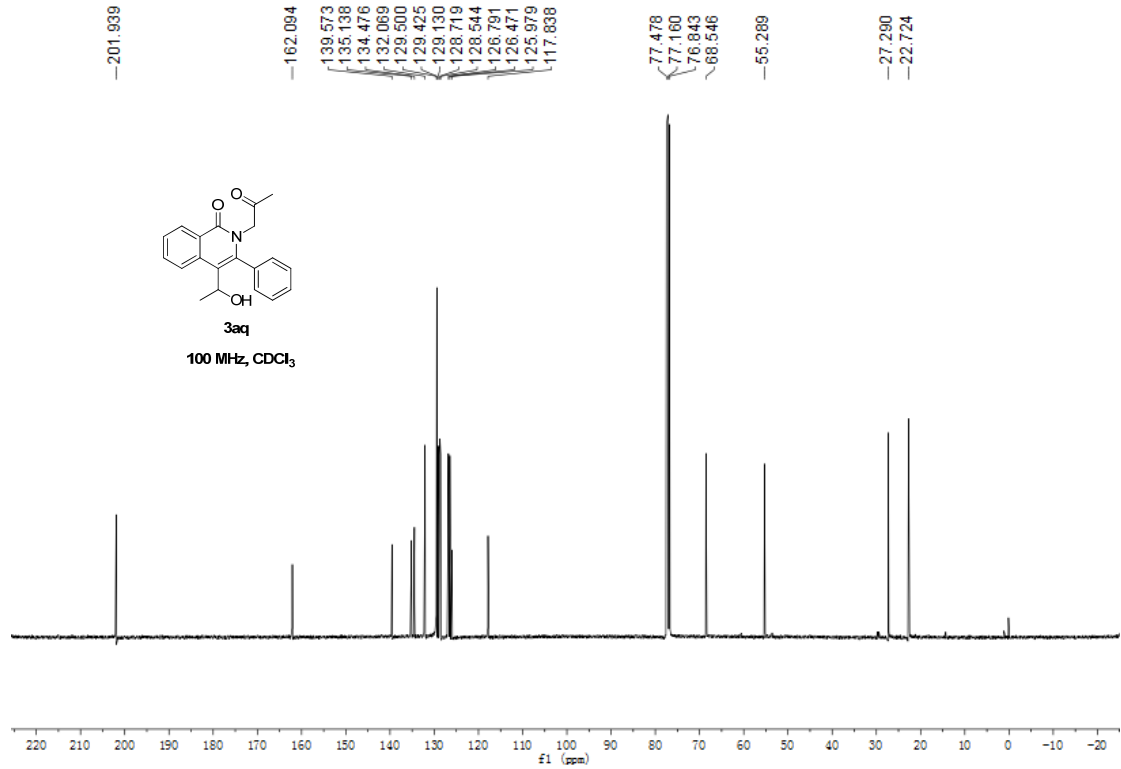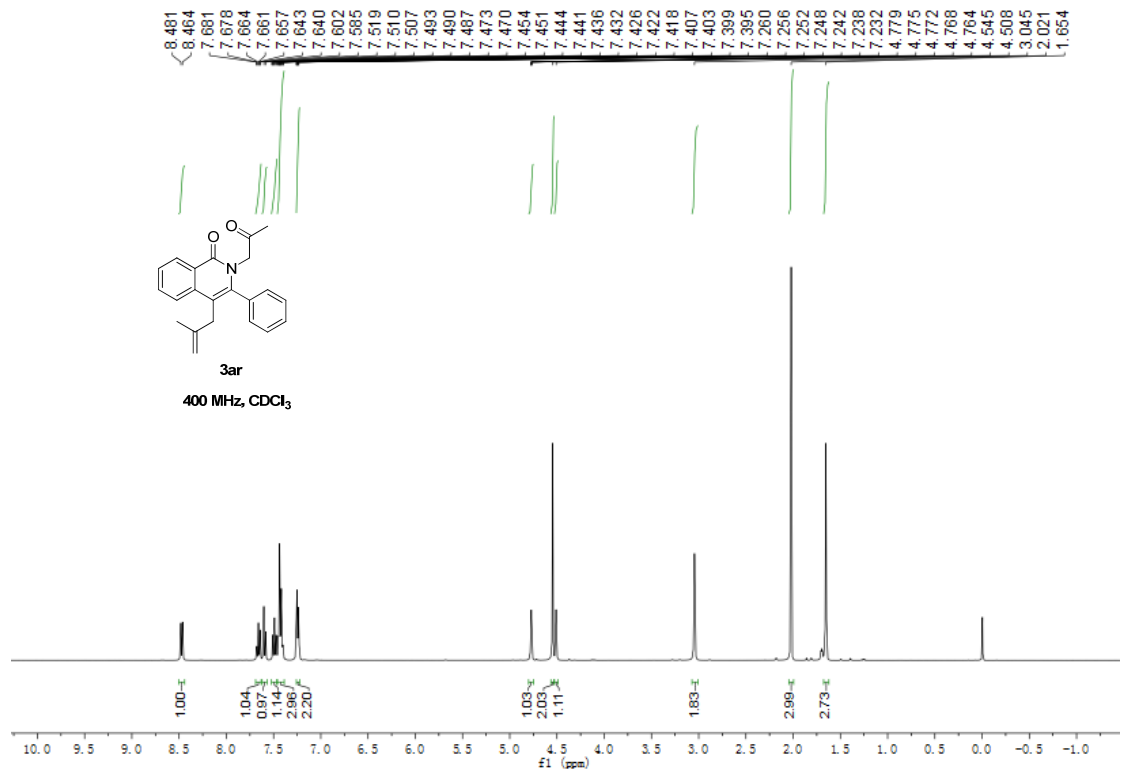

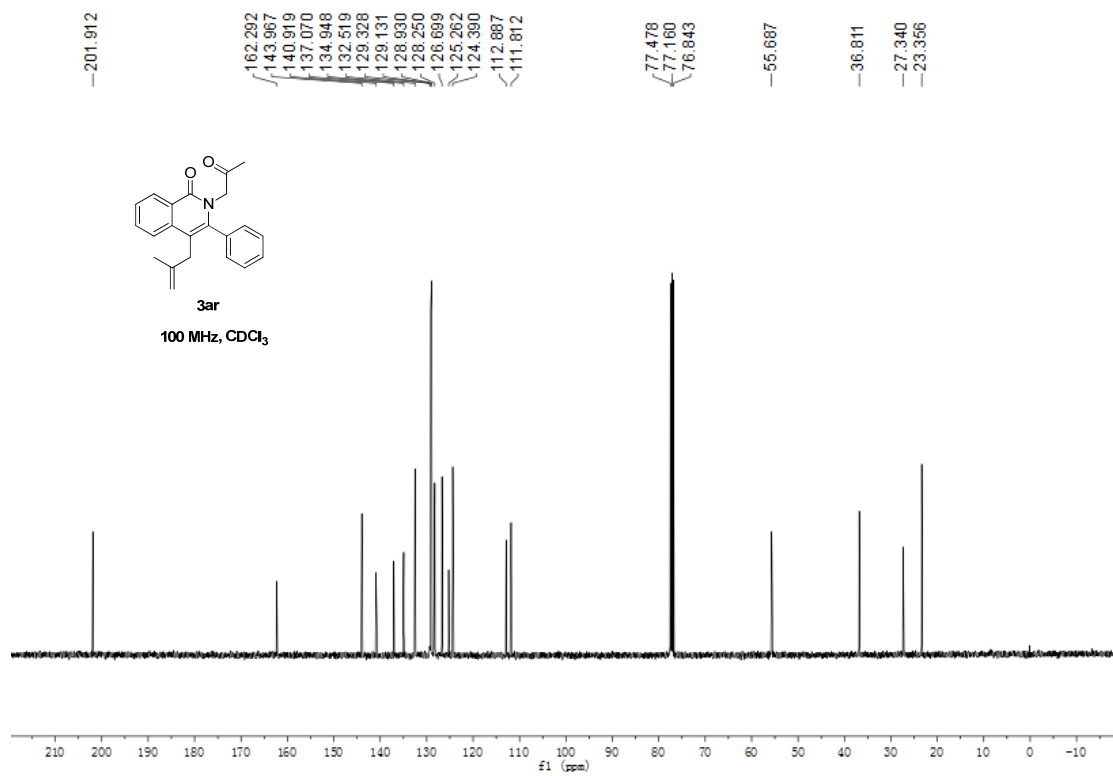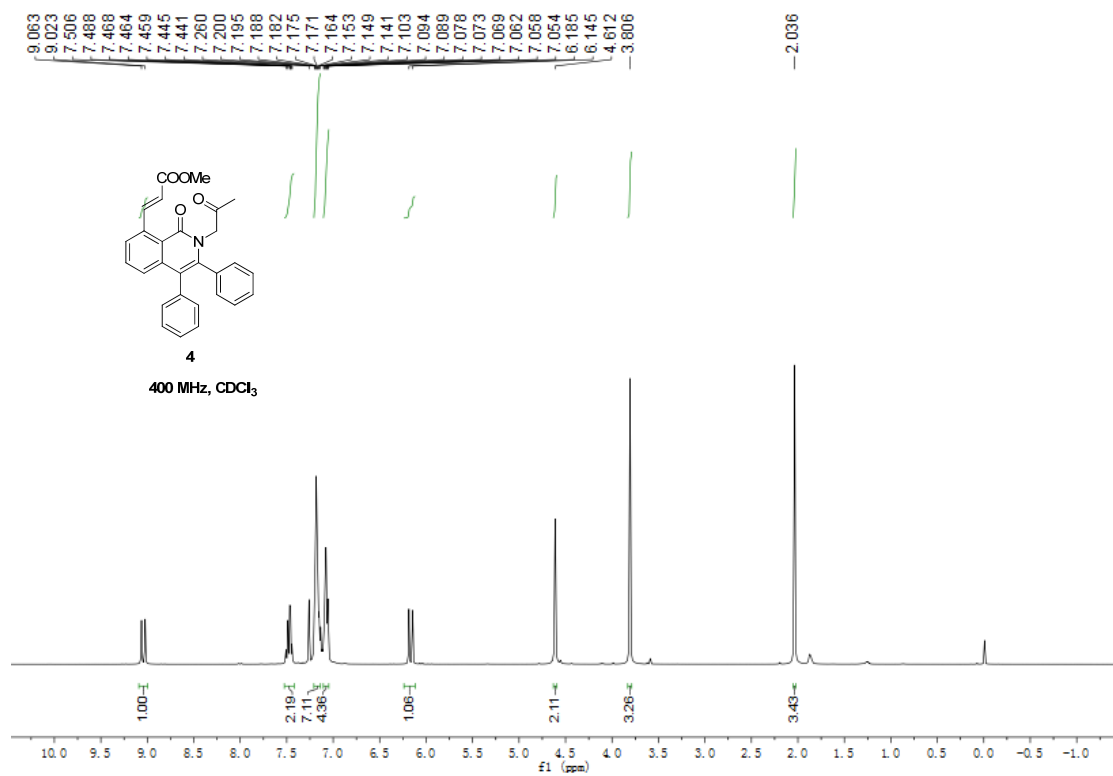



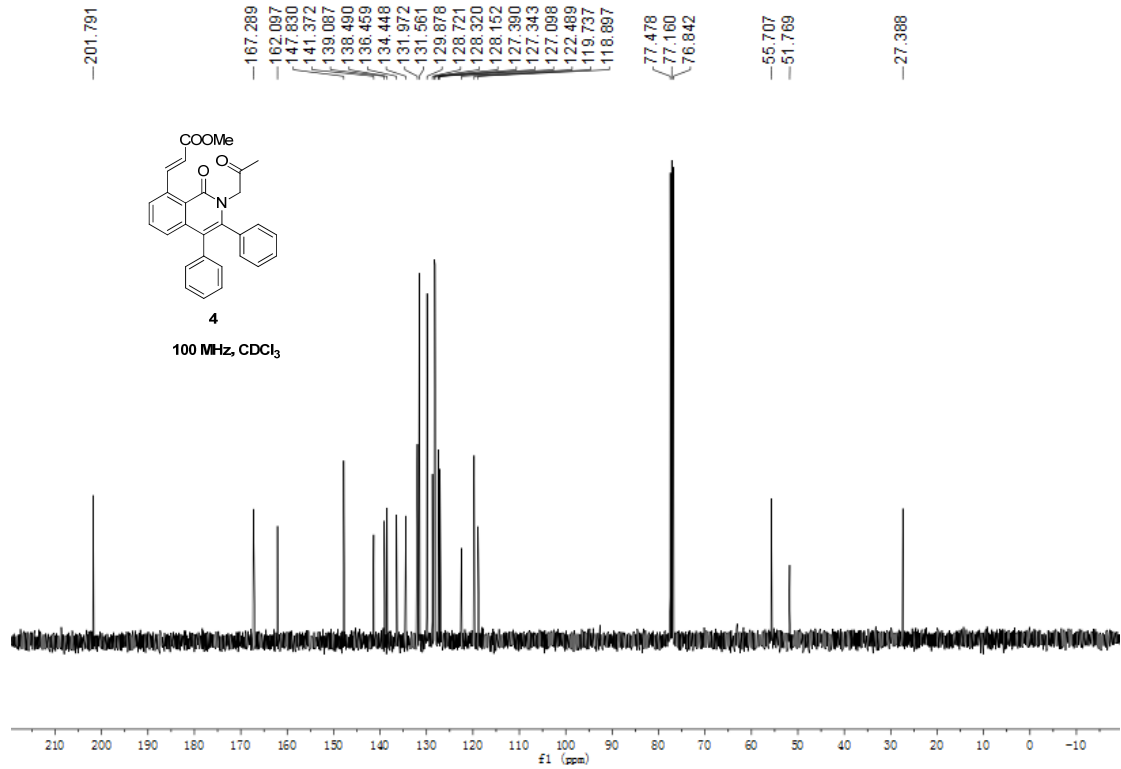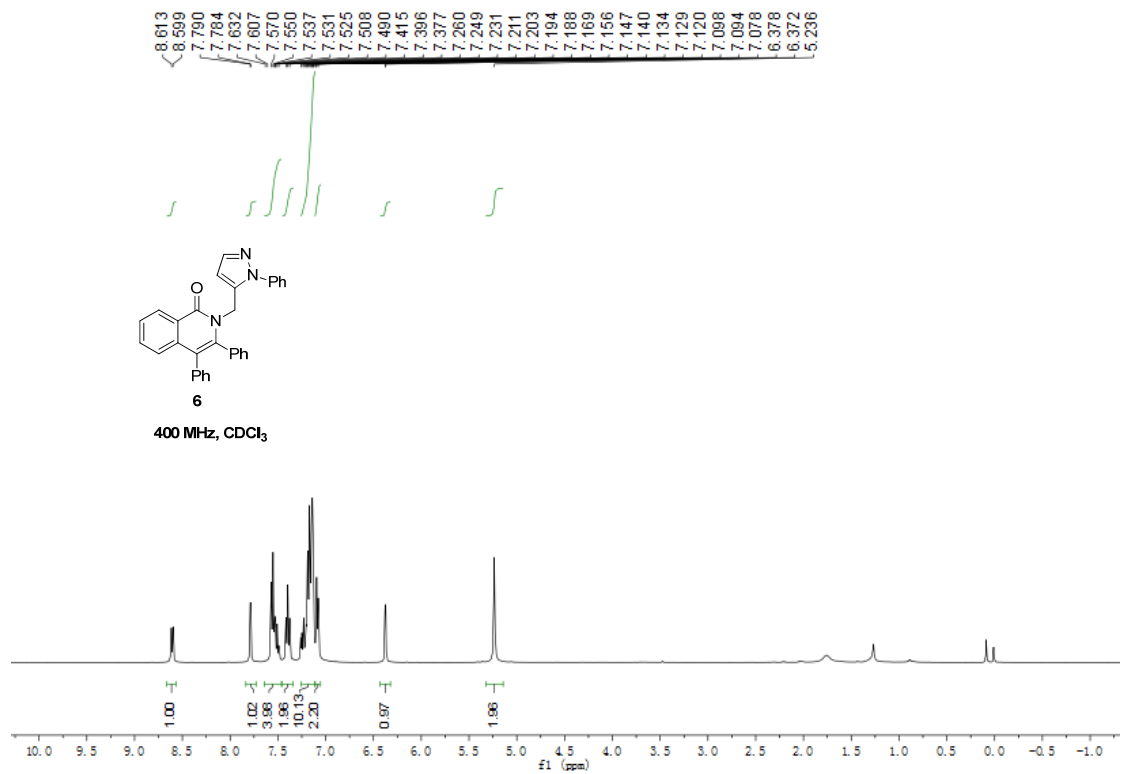

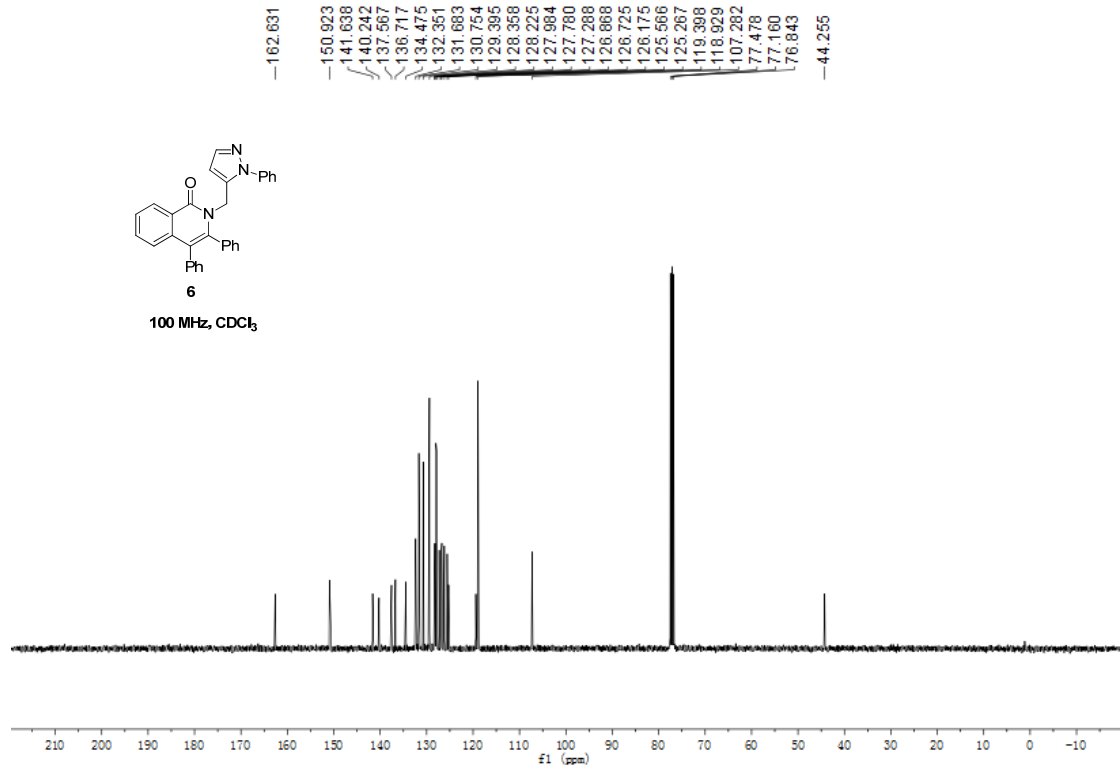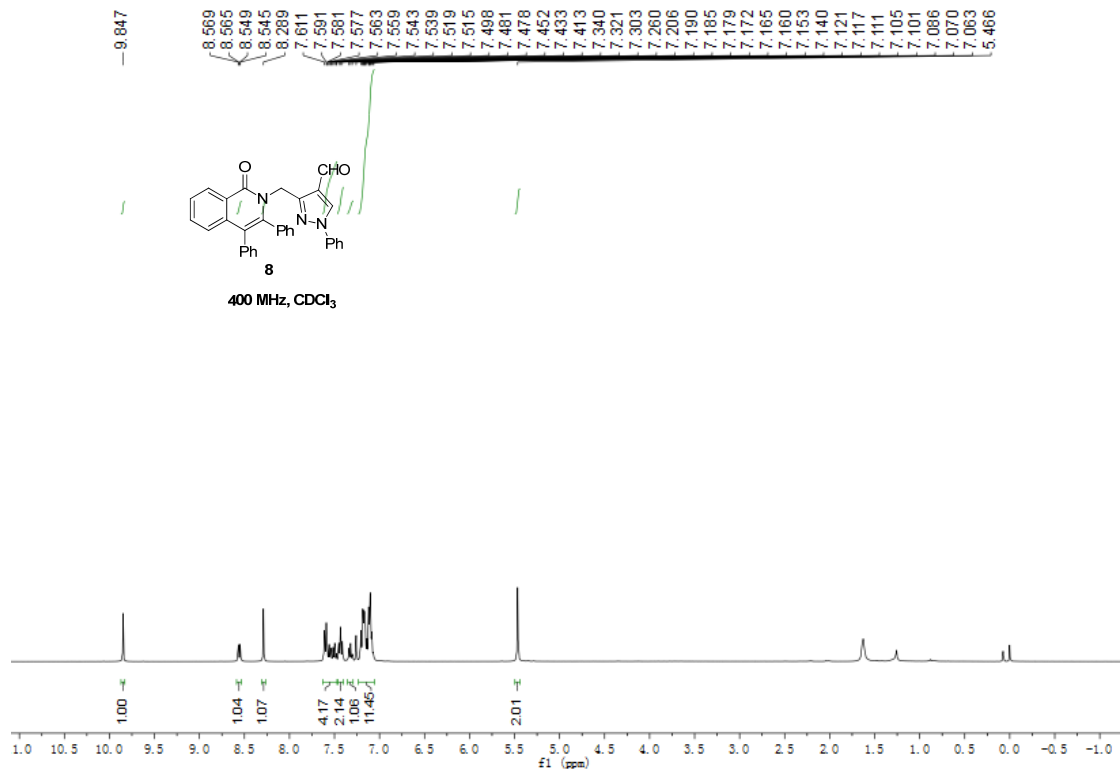

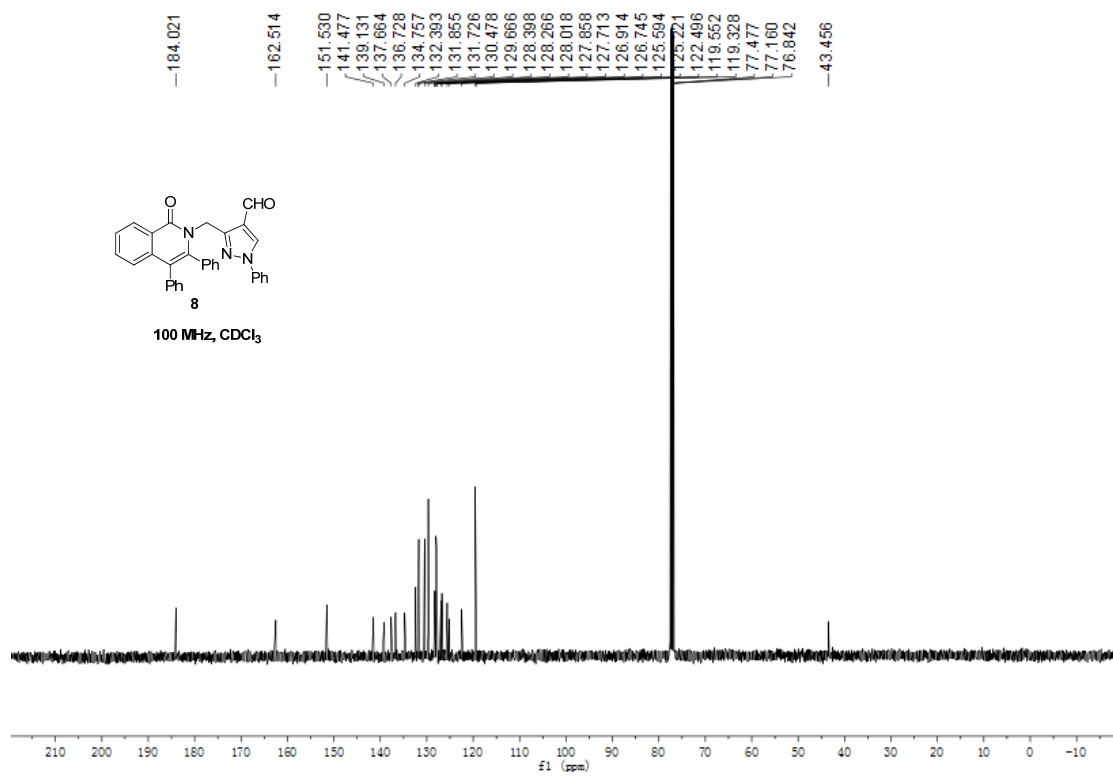

Supplement: d0ob02389b1.pdf [file d0ob02389b1.pdf]
